# Supplementary material for: Lampreys underwent radical changes in ecology and morphology during the Jurassic era
Source: Research Square preprint supplement (doi:10.21203/rs.3.rs-2414749/v1), 2023-01-17
Supplement: Supplementary file 1 [file 79d773dfa71389df0fbbb52c.docx]

The Supplementary Dataset for:

**Lampreys underwent radical changes in ecology and morphology during the Jurassic era**

**Extended Data File 1: Total evidence data matrix**

#NEXUS

Begin data;

Dimensions ntax = 45 nchar = 1701;

Format datatype = mixed (standard:1-208, DNA:209-1701) interleave = yes gap = - missing = ?;

Matrix

*Euconodonta* ?10?????????????????-----10????0???????????0---???????1??00???-??0???--?????????201010?00--1110---0??1111111110-1------------2------0-?0-110?--0-????????00????01?1???------------------------------------------

*Jamoytius*  111????????????11?0?-----10????0???????????010-?00?10000030?0051?????--?????????10?0??00110??1??00?????????0-011??0?--000-?-0-0----0--?0-0-0?0-0-????????100????1?????------------------------------------------

*Euphanerops*  111????????????110??-----10????????????????010-100?100001-1100-101???--?????????101021001101110--01110-------10-------------0-0-----0-?0-0-0?0-0-?111111?10001??1110--------------------------------------------

*Achanarella*  111????????????11?00-----10????0???????????00--?00??0??0131?00-??????--?????????10112100?--110-----??---------------------------------?0-?????-?-?????????00??????1???------------------------------------------

*Ciderius*  111????????????11?00-----10????0???????????00--?00?10??0130?00-??????--?????????101???00?--??0-----??---------------------------------?0-????0-?-?????????00????1?1???------------------------------------------

*Cornovichthys*  ?11?????????????????-----10?????1??????????00--?00?10000031100-?0????--?????????10102000101110-----??---------------------------------?0-????0-?-?????????00??????1???------------------------------------------

*Lasanius*  ?11????????????11?00-----10????01??????????02-0????101100101005001???--?????????1010210011011110100??????--0-011????-10111?-000----0--?0-0-??0-0-????????100????1?1???------------------------------------------

*Birkenia*  111?????????1??11?0?-----10????0???????110?02-0????101100201003001???--?????????0010210011011110100??110---1-0101000-101110110102-010-?100-??0-0-?????????00??????1???------------------------------------------

*Rhyncholepis*  111?????????1??11?0?-----10????0???????110?02-0????101100201000001???--?????????0010210011011110100??110---1-0101000-101111110102-010-?100-??0-0-?????????00??????1???------------------------------------------

*Myxinikela* 111????????????10?00000??10????11??????????12-0?00?10??0000??0-??0???--?????????10?010?00--1?0-----??---------------------------------10-????0?0-?????100001????1??0--------------------------------------------

*Tethymyxine*  1?1????????????1010?101????????????????????02-1????10??0020??0-1?0110--?????????20?010001000?0-----??---------------------------------10-11110?0-?????1??00110???01110------------------------------------------

*Paramyxine_fernholmi*  111101011000-101010000001110---11010100100202-2100010120010000-100110--10111010020101000100010-----??---------------------------------10-1111010-110011000011011101101------------------------------------------

*Eptatretus_burgeri*  111101011000-10101000000?110---11010100100202-1100010110010000-100110--10111010020101000100010-----1?---------------------------------10-1111010-110011000011011101100------------------------------------------

*Eptatretus_stoutii*  111101011000-101010000011110---11010100100202-2100010110030000-100110--10111010020101000100010-----11---------------------------------10-1111010-110011000011011101100------------------------------------------

*Myxine_glutinosa*  111101011000-101010000000120---11010100100202-2100011--0010-00-100110--10111010020101000100010-----11---------------------------------10-1111000-110011000011011101101------------------------------------------

*Rubicundus_eos*  11110?011000-1010100111??110---11010?00100?02-1100010000000000-100110--101110?0020101000100010-----??---------------------------------10-1111010-110011000011011101110------------------------------------------

*Rubicundus_lopheliae*  11110?011000-101010011111110---11010?00100?02-1100010000000000-100110--101110?0020101000100010-----??---------------------------------10-1111010-110011000011011101100------------------------------------------

*Neomyxine_biniplicata*  11110?011000-1010100000?0120---11010?00100?02-1100011--0010000-100110--101110?0020101000100010-----??---------------------------------10-1111000-110011000011011101110------------------------------------------

*Myxineidus*  ??1?????????????????-----??????????????????10--????1????0?0??0-??110????????????20?????0?????0-----??---------------------------------?0-11??0-0?0???????000??????????------------------------------------------

*Gilpichthys*  ?11?????????????????-----10????01??????????20--????10?1001000?-0?0???--?????????10?0?0?00--010-----??---------------------------------?0-11????0-????????000????1?10--------------------------------------------

*Lethenteron_camtschaticum*  11110101011111011000-----10100001000101110100--100010000010100-00110111111000100201110000--110-----11---------------------------------11110110-101110011011001111110--020112220111110000010201001??1001012100000

*Petromyzon_marinus*  11110101011111011000-----10100001000101110100--100010000010100-00110100111000100201110000--110-----11---------------------------------11110110-111110011011001111110--011102001000000000010211111001000100000300

*Lampetra_fluviatilis*  11110101011111011000-----10100001000101110100--100010000010100-00110101111000100201110000--110-----11---------------------------------11110110-101110011011001111110--020212222101110000010101011001101012100000

*Geotria_australis*  11110?01011111011000-----1010000100010?110100--100010000010100-00110110111000100201110000--110-----??---------------------------------11110110-111110011011001111110--212032230110320100121220211211012101110111

*Ichthyomyzon_bdellium*  11110101011111011000-----10100001000101110100--100010000010100-00110100111000100201110000--110-----11---------------------------------11110110-111110011011001111110--011102000000000000?0001101???1000110000200

*Ichthyomyzon_castaneus* 11110101011111011000-----10100001000101110100--100010000010100-00110100111000100201110000--110-----11---------------------------------11110110-111110011011001111110--011102100000000000?00011011??1000110000200

*Ichthyomyzon_unicuspis*  11110101011111011000-----10100001000101110100--100010000010100-00110100111000100201110000--110-----11---------------------------------11110110-111110011011001111110--011002000000000000000011011??1000110000200

*Mordacia_mordax*  11110?01011111011000-----10100001000?0?110100--100010000010100-00110100111000?0?201110000--110-----??---------------------------------11110110-131110011011001111110--012322041000011011221202011121000011101400

*Mordacia_lapicida*  11110?01011111011000-----10100001000?0?110100--100010000010100-00110100111000?0?201110000--110-----??---------------------------------11110110-131110011011001111110--012322041000011021?20222?????1000011101400

*Caspiomyzon_wagneri*  11110101011111011000-----10100001000101110100--100010000010100-00110101111000100201110000--110-----11---------------------------------11110110-111110011011001111110--111001100101010000?10111001??1000101000?00

*Tetrapleurodon_spadiceus*  11110101011111011000-----10100001000101110100--100010000010100-00110111111000100201110000--110-----11---------------------------------11110110-101110011011001111110--01111211011121000??101?100???1001012100?00

*Entosphenus_macrostomus*  11110101011111011000-----10100001000101110100--100010000010100-00110111111000100201110000--110-----11---------------------------------11110110-101110011011001111110--02121111011121000???01?101???1001012100200

*Entosphenus_minimus*  11110101011111011000-----10100001000101110100--100010000010100-00110110111000100201110000--110-----11---------------------------------11110110-101110011011001111110--021211110010110000?1011100???1001012100200

*Entosphenus_similis*  11110101011111011000-----10100001000101110100--100010000010100-00110111111000100201110000--110-----11---------------------------------11110110-101110011011001111110--02121111011111000???010101???1001012100200

*Entosphenus_tridentatus*  11110101011111011000-----10100001000101110100--100010000010100-00110111111000100201110000--110-----11---------------------------------11110110-101110011011001111110--021211110111210000010111011?01001012100200

*Eudontomyzon_danfordi*  11110101011111011000-----10100001000101110100--100010000010100-00110111111000100201110000--110-----11---------------------------------11110110-111110011011001111110--010112222111210000?1010100???1000010100?00

*Eudontomyzon_morii*  11110101011111011000-----10100001000101110100--100010000010100-00110111111000100201110000--110-----11---------------------------------11110110-111110011011001111110--01011222211111000???02?100???1000010100?00

*Lampetra_ayresii*  11110101011111011000-----10100001000101110100--100010000010100-00110101111000100201110000--110-----11---------------------------------11110110-101110011011001111110--020212222101010000?1010100???1101012100000

*Mesomyzon* 111????????????11000-----10????01??????????10--100?10000010100-00111????1??0????20110100100110-----??---------------------------------11110110?121????11?11001??0110--00200?????????01?0?20112??1??11?21031???--

*Yanliaomyzon_ ingensdentes*  111?????????????????-----10????01??????????20--100?10000010000-0011?????1??0????20110?000--110-----??---------------------------------11110110-111????1??11001??0110--212032230?????00?0?10?11??1??1112101110111

*Yanliaomyzon_ occisor*  111?????????????????-----10????01??????????20--100?10000010000-0011?????1??0????20110?00???110-----??---------------------------------11110110-111????1??11001??0110--212032230?????00?0?10?1???1??1112101110111

*Priscomyzon*  111?????????????1???-----10????01??????????20--100?10000010??0-001??????1???????01?0???00--??0-----??---------------------------------11110110-?21????1??110?1???110-?-01?40?????????????00?????0??10??003????--

*Mayomyzon*  111????????????110??-----10????01??????????20--100?10?10010100-001??????????????100010?00--110-----??---------------------------------11111?10-1?1????1??11001???110-???????????????????????????0??10???????????

*Hardistiella*  ?11?????????????1???-----10????0????1??????20--1???10?10010??0-001??????????????101111?00--110-----??---------------------------------???????0-???????????11?1???11??????????????????????1???0??????????????????

*Pipiscius*  11??????????????????-----10????01??????????21--????10?1??0010?-0?????--?????????101020?00--1?0-----??---------------------------------?110-?00-?-?????????10????1110--0021?0?????????????????0??0??10??10?--??--

[16S, 772 sites]

*Euconodonta*  ????????????????????????????????????????????????????????????????????????????????????????????????????????????????????????????????????????????????????????????????????????????????????????????????????????????????????????????????????????????????????????????????????????????????????????????????????????????????????????????????????????????????????????????????????????????????????????????????????????????????????????????????????????????????????????????????????????????????????????????????????????????????????????????????????????????????????????????????????????????????????????????????????????????????????????????????????????????????????????????????????????????????????????????????????????????????????????????????????????????????????????????????????????????????????????????????????

*Jamoytius*  ????????????????????????????????????????????????????????????????????????????????????????????????????????????????????????????????????????????????????????????????????????????????????????????????????????????????????????????????????????????????????????????????????????????????????????????????????????????????????????????????????????????????????????????????????????????????????????????????????????????????????????????????????????????????????????????????????????????????????????????????????????????????????????????????????????????????????????????????????????????????????????????????????????????????????????????????????????????????????????????????????????????????????????????????????????????????????????????????????????????????????????????????????????????????????????????????????

*Euphanerops*  ????????????????????????????????????????????????????????????????????????????????????????????????????????????????????????????????????????????????????????????????????????????????????????????????????????????????????????????????????????????????????????????????????????????????????????????????????????????????????????????????????????????????????????????????????????????????????????????????????????????????????????????????????????????????????????????????????????????????????????????????????????????????????????????????????????????????????????????????????????????????????????????????????????????????????????????????????????????????????????????????????????????????????????????????????????????????????????????????????????????????????????????????????????????????????????????????????

*Achanarella*  ????????????????????????????????????????????????????????????????????????????????????????????????????????????????????????????????????????????????????????????????????????????????????????????????????????????????????????????????????????????????????????????????????????????????????????????????????????????????????????????????????????????????????????????????????????????????????????????????????????????????????????????????????????????????????????????????????????????????????????????????????????????????????????????????????????????????????????????????????????????????????????????????????????????????????????????????????????????????????????????????????????????????????????????????????????????????????????????????????????????????????????????????????????????????????????????????????

*Ciderius*  ????????????????????????????????????????????????????????????????????????????????????????????????????????????????????????????????????????????????????????????????????????????????????????????????????????????????????????????????????????????????????????????????????????????????????????????????????????????????????????????????????????????????????????????????????????????????????????????????????????????????????????????????????????????????????????????????????????????????????????????????????????????????????????????????????????????????????????????????????????????????????????????????????????????????????????????????????????????????????????????????????????????????????????????????????????????????????????????????????????????????????????????????????????????????????????????????????

*Cornovichthys*  ????????????????????????????????????????????????????????????????????????????????????????????????????????????????????????????????????????????????????????????????????????????????????????????????????????????????????????????????????????????????????????????????????????????????????????????????????????????????????????????????????????????????????????????????????????????????????????????????????????????????????????????????????????????????????????????????????????????????????????????????????????????????????????????????????????????????????????????????????????????????????????????????????????????????????????????????????????????????????????????????????????????????????????????????????????????????????????????????????????????????????????????????????????????????????????????????????

*Lasanius*  ????????????????????????????????????????????????????????????????????????????????????????????????????????????????????????????????????????????????????????????????????????????????????????????????????????????????????????????????????????????????????????????????????????????????????????????????????????????????????????????????????????????????????????????????????????????????????????????????????????????????????????????????????????????????????????????????????????????????????????????????????????????????????????????????????????????????????????????????????????????????????????????????????????????????????????????????????????????????????????????????????????????????????????????????????????????????????????????????????????????????????????????????????????????????????????????????????

*Birkenia*  ????????????????????????????????????????????????????????????????????????????????????????????????????????????????????????????????????????????????????????????????????????????????????????????????????????????????????????????????????????????????????????????????????????????????????????????????????????????????????????????????????????????????????????????????????????????????????????????????????????????????????????????????????????????????????????????????????????????????????????????????????????????????????????????????????????????????????????????????????????????????????????????????????????????????????????????????????????????????????????????????????????????????????????????????????????????????????????????????????????????????????????????????????????????????????????????????????

*Rhyncholepis*  ????????????????????????????????????????????????????????????????????????????????????????????????????????????????????????????????????????????????????????????????????????????????????????????????????????????????????????????????????????????????????????????????????????????????????????????????????????????????????????????????????????????????????????????????????????????????????????????????????????????????????????????????????????????????????????????????????????????????????????????????????????????????????????????????????????????????????????????????????????????????????????????????????????????????????????????????????????????????????????????????????????????????????????????????????????????????????????????????????????????????????????????????????????????????????????????????????

*Myxinikela*  ????????????????????????????????????????????????????????????????????????????????????????????????????????????????????????????????????????????????????????????????????????????????????????????????????????????????????????????????????????????????????????????????????????????????????????????????????????????????????????????????????????????????????????????????????????????????????????????????????????????????????????????????????????????????????????????????????????????????????????????????????????????????????????????????????????????????????????????????????????????????????????????????????????????????????????????????????????????????????????????????????????????????????????????????????????????????????????????????????????????????????????????????????????????????????????????????????

*Tethymyxine*  ????????????????????????????????????????????????????????????????????????????????????????????????????????????????????????????????????????????????????????????????????????????????????????????????????????????????????????????????????????????????????????????????????????????????????????????????????????????????????????????????????????????????????????????????????????????????????????????????????????????????????????????????????????????????????????????????????????????????????????????????????????????????????????????????????????????????????????????????????????????????????????????????????????????????????????????????????????????????????????????????????????????????????????????????????????????????????????????????????????????????????????????????????????????????????????????????????

*Paramyxine_fernholmi*  -----------------------------ATATAATAAGTCCTACCTGCCCAG--TGAT-TT--TTTCAACGGCCAT-------CTCTGATGATAACGTAGCATAATCAATTGTCTATTAATTATAGACTAGAATGAATGGATTAACGAAAGCCAGA-----------------------CTGTCTCCTAATTTTAATCAATGAAATTATCCTTTCTGTCCAAAGACAGAAATTCTTTTATAAGACGAAAAGACCCTA-AAAGCTTCAAACATTAA----A-TTAACCTATCTAT----------------------AA--AAACAA-TAAAGAAAA--ATACTAATTT-TAAA---AA--------------------------------------------TTTGGTTGGGGCAACCAC-------------------TGAATAAAACTATCATCAATAATTAAACGA--AA--A-----ATCT-TCTTA------------AAACAAAGTAACAACTTAGTTAAA-----------TAAGAAACTTATTAA--AATGACCCA-GA------ACCTTCTG-----A--TCAATGAA-CAAGTTACTTTAGGGATAACAGC-GCTATTTCTTTTTAAAGTTCACATCGACAAAGAAGCTTACGACCTCGATGTTGGATTAAGATACCCAAGTGGTGCAAAAGCTACTAATGGTTCGTTTGTTCAACGAATAATA-TCTTACGTGATCTGA---------------------

*Eptatretus_burgeri*  TTATTGTTTAATTA---------------ACATAATAAGTCCTACCTGCCCAG--TGAT-TTT--TTCAACGGCCAT-------CTCTGATGATAACGTAGCATAATCAATTGTCTATTAATTATAGACTAGAATGAATGGATTAACGAAAGCCAAA-----------------------CTGTCTCCTAATTTTAATCAATGAAATTATCCTTTCTGTTCAAAGACAGAAATTTTCTTATAAGACGAAAAGACCCTA-AAAGCTTCAAACATTAA----A-TTAACCTATCTAT-------------------AA-----AAACAAATAAAGAAAA--ATACTAATTT-TAAA---------------------------------------------A--ATTTGGTTGGGGCAACCAT-------------------TGAATAAAACTATCATCAATAATTAAACGA--AA--A-----ATTT-TCTTA------------AAACAAAGTAACAACTTAATTAAA-----------TAAGAAACTTATTAA--AATGACCCA-GA------ATCTTCTG-----A--TCAATGAA-CAAGTTACTTTAGGGATAACAGC-GCTATTTCTTTTTAAAGTTCACATCGACAAAGAAGCTTACGACCTCGATGTTGGATTAAGATACCCAAGTGGTGCAAAAGCTACTAATGGTTCGTTTGTTCAACGAATAATA-TCTTACATGATCTGAGTTCAGACCGGAGTAATCC--

*Eptatretus_stoutii*  CGCTTATTGTTAAA------------TTAATATAATAAGTCCTACCTGCCCAG--TGAT-TT--T-TCAACGGCCAT-------CTCTGATGATAACGTAGCATAATCAATTGTCTATTAATTATAGACTAGAATGAATGGATTAACGAAAGCCAAA-----------------------CTGTCTCCTAATTTTTATCAATGAAATTATCCTTTCTGTTCAAAGACAGAAATCCTCTTATAAGACGAAAAGACCCTA-AAAGCTTCAAACATTAA----A-TTAACCTATCTGT----------------------AA--AAACAAATAAAGAAAA--ATACTAATTT-TAAA---AA--------------------------------------------TTTGGTTGGGGCAACCAT-------------------TGAATAAAACTATCATCAACAATTAAACGA--AA--A-----ATTT-TCTTA------------AAACAGAATTACAACTCAGTTAAA-----------TAAGAAACTTATTAA--AATGACCCA-GA------ATCCTCTG-----A--TCAATGAA-CAAGTTACTTTAGGGATAACAGC-GCTATTTCTTTTTAAAGTTCACATCGACAAAGAAGCTTACGACCTCGATGTTGGATTAAGATACCCAAGTGGTGCAAAAGCTACTAA--------------------------------------------------------------

*Myxine_glutinosa*  TTATTGTTATAAAA---------------ATATAATAAGTCCTACCTGCCCAG--TGAT-TTT--TTCAACGGCCAT-------CTTTGATGATAACGTAGCATAATCAATTGTCTATTAATTTTAGACTAGAATGAATGGATTAACGAAAGCCGAA-----------------------CTGTCTCCTATTTCCTATCAATGAAATTAACCTCTCTGTCCAAAGGCAGAGATAAGCCTATAAGACGAAAAGACCCTA-AAAGCTTCAAAT---------A-TTAGATTACCTAG---------------CTTAAA-----CAACAACTAAAGAAAA--GTTTTAATTCCTAAA---------------------------------------------A---TTTGGTTGGGGCAACCATTGATATTAAAGAATCATCAATAATTTAACTAATAACTTGCATAATATCA---------------------------------------GAGTTACATCTCAATTAAGTAAGAAACTTATAAAAATGACCCAGAAAACTGATCAA-TG------A---------------A--------CAAGTTACTTTAGGGATAACAGC-GCTATTTCTTTTTAAAGTCCCCATCGACAAAGAAGCTTACGACCTCGATGTTGGATTAAGATATCCAAGTGGTGCAAAAGCTACTAACGGTTCGTTTGTTCAACGAGTAATA-TCTTACATGATCTGAGTTCAGACCGGAGTAATCC--

*Rubicundus_eos*  ????????????????????????????????????????????????????????????????????????????????????????????????????????????????????????????????????????????????????????????????????????????????????????????????????????????????????????????????????????????????????????????????????????????????????????????????????????????????????????????????????????????????????????????????????????????????????????????????????????????????????????????????????????????????????????????????????????????????????????????????????????????????????????????????????????????????????????????????????????????????????????????????????????????????????????????????????????????????????????????????????????????????????????????????????????????????????????????????????????????????????????????????????????????????????????????????????

*Rubicundus_lopheliae*  -----------------------------ATATAATAAGTCATTCCTGCCCAG--TGAT-TT--TTTTAACGGCCAT-------CTTTGATGATAACGTAGCATAATCAATTGTCTATTAATTATAGACTAGAATGAACGGATTAACGAAAGCCGAA-----------------------CTGTCTCCTAAATTCCATCAATGAAATTAACCTCTCTGTTCAAAGGCAGAGATACTTTTATAAGACGAAAAGACCCTA-AAAGCTTCAAATACTAA----AATTAACTTATCTAT----------------------TA--TATCAAATAAAGAAAA--ATACTAATTT-TTAA---AA--------------------------------------------TTTGGTTGGGGCAACCAT-------------------AGATTAAAACTATCATCTATAATTAAATTA--GTCTA-----CCAC-TATAA------------TATTAGGGAAACACCTCTATTAAA-----------TAAGACACTTAATAT--AATGATCCA-GA------AATAACTG-----A--TCAATGAA-CAAGTTACTTTAGGGATAACAGC-GCTATTTCTTTCAAAAGTTCCTATCGACAAAGAAGCTTACGACCTCGATGTTGGATTAAGATACCCAAGTGGTGCAAAAGCTACTAAAGGTTCGTTTGTTCAACGAATAATA-TCTTACGTGATCTGAG--------------------

*Neomyxine_biniplicata*  -----------------------------TAATAATAAGTCCTACCTGCCCAG--TGATTTT--TTTCAACGGCCAT-------CTTTGATGATAACGTAGCATAATCAATTGTCTATTAACTGTAGACTTGAATGAATGGATTAACGAGAGCCAAA-----------------------CTGTCTCCTAATTTTAATCAATGAAACTAACCTTTCTGTCCAAAGGCAGAAATAAATATATAAGACGAAAAGACCCTA-AAAGCTTCAAATACTAA----A-TTAACCTTCTTGC----------------------GA--ATAACAACTTAAAGAA--CCACTAATTT-CTAA---AA--------------------------------------------TTTGGTTGGGGCAACCAT-------------------TTAAGCAAACCATCATCAATAATTAAACTT--A---A-----CCTT-AATGA------------TTCAAGAGTGACTACTCAATAAAC-----------TAAGAAACTTATTAA--TATGACCCAGGA------ATAATCTG-----A--TCAATGAA-CAAGTTACTTTAGGGATAACAGC-GCTATTTCTTTTCAAAGTTCCCATCGACAAAGAAGCTTACGACCTCGATGTTGGATTAAGATACCCTAGTGGTGCAAAAGCTACTAACGGTTCGTTTGTTCAACGATTAATA-TCTTACGTGATCTGAGTTCAGA------------CC

*Myxineidus*  ????????????????????????????????????????????????????????????????????????????????????????????????????????????????????????????????????????????????????????????????????????????????????????????????????????????????????????????????????????????????????????????????????????????????????????????????????????????????????????????????????????????????????????????????????????????????????????????????????????????????????????????????????????????????????????????????????????????????????????????????????????????????????????????????????????????????????????????????????????????????????????????????????????????????????????????????????????????????????????????????????????????????????????????????????????????????????????????????????????????????????????????????????????????????????????????????????

*Gilpichthys*  ????????????????????????????????????????????????????????????????????????????????????????????????????????????????????????????????????????????????????????????????????????????????????????????????????????????????????????????????????????????????????????????????????????????????????????????????????????????????????????????????????????????????????????????????????????????????????????????????????????????????????????????????????????????????????????????????????????????????????????????????????????????????????????????????????????????????????????????????????????????????????????????????????????????????????????????????????????????????????????????????????????????????????????????????????????????????????????????????????????????????????????????????????????????????????????????????????

*Lethenteron_camtschaticum*  CTCCAGATAAGAAT------------CACCTATTGGAGGCAAGACCTGCCCAA--TGAT-TAATATTGAATGGCCGCGGTACTTTGACCGTGTAAAAGTAGCGTAATCACTTGTCTTGTAAATTAAGACTGGAATGAAAGGTTACACGAGGGCATAA-----------------------CTGTCTCCTTATCCCTATCAATGAAATTGACCTACCCGTGCAAAGGCGGGTATAAACCCATAAGACGAGAAGACCCTGTGGAGCTTCCAAACATTTAC--A-TCGCATAATCATT-----------------------------------ATTCACG--ATGCACAGTT------------------------------------------------------TTAGGTTGGGGCAACCAC-------------------GGAACAAAAGTAATATCCACGACGACGAAA--AT--A--CA-ATTT-TCTTA------------ACCTAGAGTTACAACTCTAAGCAC-----------TAGTAAAACTAACGTTAATAGACCCA-GC------ATCACTTG-CTG-C--CTAACGAAACAAGTTACCCCAGGGATAACAGC-GCAATCCTTTCCACGAGCCCGAATCAACGAAAGGGTTTACGACCTCGATGTTGGATCGGGGCACCCCAATGGCGCAAAAGCTATTAAAGGTTCGTTTGTTCAACGATTAAAG-CCCCACGTGATCTGAGTTCAGACCGGAGTAATCC--

*Petromyzon_marinus*  CTCCAGATAAAAAT------------CAAGTATTGGAGGCAAGACCTGCCCAA--TGAT-TAATATTGAATGGCCGCGGTACTTTGACCGTGTAAAAGTAGCGTAATCACTTGTCTTGTAAATTAAGACTGGAATGAAAGGTTACACGAGGGCATAA-----------------------CTGTCTCCTTATCCCTATCAATGAAATTGACCTACCCGTGCAAAGGCGGGTATAAACCCATAAGACGAGAAGACCCTGTGGAGCTTCCAAACATTTAC--A-TCGAATAATAATT-----------------------------------ATTTACG--ATGTACAGTT------------------------------------------------------TTAGGTTGGGGCAACCAC-------------------GGAACAAAAGTAATATCCACGACGACGAAAATAT--A-----ATTT-TCTAA------------GCCTAGAACCACAACTCTAAGCAC-----------TAGTAAAACTAACGTTAATAGACCCA-GC------ATCACTTGCTGACT----AACGAAACAAGTTACCCCAGGGATAACAGC-GCAATCCTTTCCACGAGCCCGAATCAACGAAAGGGTTTACGACCTCGATGTTGGATCGGGGCACCCCAATGGCGCAAAAGCTATTAAAGGTTCGTTTGTTCAACGATTAAAG-CCCCACGTGATCTGAGTTCAGACCGGAGTAATCC--

*Lampetra_fluviatilis*  CTCCAGATAAGAAT------------CGCCTATTGGAGGCAAGACCTGCCCAA--TGAT-TAATATTGAATGGCCGCGGTACTTTGACCGTGTAAAAGTAGCGTAATCACTTGTCTTGTAAATTAAGACTAGAATGAAAGGTTACACGAGGGCATAA-----------------------CTGTCTCCTTATCCCTATCAATGAAATTGACCTACCCGTGCAAAGGCGGGTATAAACCCATAAGACGAGAAGACCCTGTGGAGCTTCCAAACATTTAC--A-TCGCATAATCATT-----------------------------------ATTCACG--ATGCACAGTT------------------------------------------------------TTAGGTTGGGGCAACCAC-------------------GGAACAAAAGTAATATCCACGACGACGAAA--AT--A--CA-ATTT-TCTTA------------GCCTAGAGTTACAACTCTAAGCAC-----------TAGTAGAACTAACGTTAATAGACCCA-GC------ATCACTTG-CTG-C--CTAACGAAACAAGTTACCCCAGGGATAACAGC-GCAATCCTTTCCACGAGCCCGAATCAACGAAAGGGTTTACGACCTCGATGTTGGATCGGGGCACCCCAATGGCGCAAAAGCTATTAAAGGTTCGTTTGTTCAACGATTAAAG-CCCCACGTGATCTGAGTTCAGACCGGAGTAATCC--

*Geotria_australis*  CTCCTGTTATACAA---ATTAAACA-CACAAATGAGAGGTAAGACCTGCCCAAT-GAAA-AATATTTCAATGGCCGCGGTACTTTGACCGTGTAAAAGTAGCGTAATCACTTGTCTTGTAAATTAAGACTGGAATGAAAGGTTACACGAGGGCATAA-----------------------CTGTCTCCTTATCCTGATCAATGAAATTGACCTACCCGTGCAAAGGCAGGTATATGTACATAAGACGAGAAGACCCTGTGGAGCTTCCAAACATTA-----------------------------------GTGCC-----GAGTAGCCCCATCACC--GGTACGCAGT--------------------------------------------------T---TTAGGTTGGGGCAACCAC-------------------GGAACAAAAGTAACATCCATGACGATGAAA--AT--A--TA-ATTT-TCTCA------------GCTTAGAGTGACAACTCAAAATAC-----------TAGTATGACTAACGTTAATAGACCCA-GT------ATAACTTA-CTG-C--TTTACGAAACAAGTTACCCCAGGGATAACAGC-GCAATCCTTTCCACGAGCTCGAATCAACGAAAGGGTTTACGACCTCGATGTTGGATCGGGGCACCCCAATGGCGCAAAAGCTATTAAAGGTTCGTTTGTTCAACGATTAAAG-CCCCACGTGATCTGAGTTCAGACCGGAGTAATCC--

*Ichthyomyzon_bdellium*  ????????????????????????????????????????????????????????????????????????????????????????????????????????????????????????????????????????????????????????????????????????????????????????????????????????????????????????????????????????????????????????????????????????????????????????????????????????????????????????????????????????????????????????????????????????????????????????????????????????????????????????????????????????????????????????????????????????????????????????????????????????????????????????????????????????????????????????????????????????????????????????????????????????????????????????????????????????????????????????????????????????????????????????????????????????????????????????????????????????????????????????????????????????????????????????????????????

*Ichthyomyzon_castaneus*  ????????????????????????????????????????????????????????????????????????????????????????????????????????????????????????????????????????????????????????????????????????????????????????????????????????????????????????????????????????????????????????????????????????????????????????????????????????????????????????????????????????????????????????????????????????????????????????????????????????????????????????????????????????????????????????????????????????????????????????????????????????????????????????????????????????????????????????????????????????????????????????????????????????????????????????????????????????????????????????????????????????????????????????????????????????????????????????????????????????????????????????????????????????????????????????????????????

*Ichthyomyzon_unicuspis*  ????????????????????????????????????????????????????????????????????????????????????????????????????????????????????????????????????????????????????????????????????????????????????????????????????????????????????????????????????????????????????????????????????????????????????????????????????????????????????????????????????????????????????????????????????????????????????????????????????????????????????????????????????????????????????????????????????????????????????????????????????????????????????????????????????????????????????????????????????????????????????????????????????????????????????????????????????????????????????????????????????????????????????????????????????????????????????????????????????????????????????????????????????????????????????????????????????

*Mordacia_mordax* ????????????????????????????????????????????????????????????????????????????????????????????????????????????????????????????????????????????????????????????????????????????????????????????????????????????????????????????????????????????????????????????????????????????????????????????????????????????????????????????????????????????????????????????????????????????????????????????????????????????????????????????????????????????????????????????????????????????????????????????????????????????????????????????????????????????????????????????????????????????????????????????????????????????????????????????????????????????????????????????????????????????????????????????????????????????????????????????????????????????????????????????????????????????????????????????????????

*Mordacia_lapicida* ????????????????????????????????????????????????????????????????????????????????????????????????????????????????????????????????????????????????????????????????????????????????????????????????????????????????????????????????????????????????????????????????????????????????????????????????????????????????????????????????????????????????????????????????????????????????????????????????????????????????????????????????????????????????????????????????????????????????????????????????????????????????????????????????????????????????????????????????????????????????????????????????????????????????????????????????????????????????????????????????????????????????????????????????????????????????????????????????????????????????????????????????????????????????????????????????????

*Caspiomyzon_wagneri*  ????????????????????????????????????????????????????????????????????????????????????????????????????????????????????????????????????????????????????????????????????????????????????????????????????????????????????????????????????????????????????????????????????????????????????????????????????????????????????????????????????????????????????????????????????????????????????????????????????????????????????????????????????????????????????????????????????????????????????????????????????????????????????????????????????????????????????????????????????????????????????????????????????????????????????????????????????????????????????????????????????????????????????????????????????????????????????????????????????????????????????????????????????????????????????????????????????

*Tetrapleurodon_spadiceus*  ????????????????????????????????????????????????????????????????????????????????????????????????????????????????????????????????????????????????????????????????????????????????????????????????????????????????????????????????????????????????????????????????????????????????????????????????????????????????????????????????????????????????????????????????????????????????????????????????????????????????????????????????????????????????????????????????????????????????????????????????????????????????????????????????????????????????????????????????????????????????????????????????????????????????????????????????????????????????????????????????????????????????????????????????????????????????????????????????????????????????????????????????????????????????????????????????????

*Entosphenus_macrostomus*  ????????????????????????????????????????????????????????????????????????????????????????????????????????????????????????????????????????????????????????????????????????????????????????????????????????????????????????????????????????????????????????????????????????????????????????????????????????????????????????????????????????????????????????????????????????????????????????????????????????????????????????????????????????????????????????????????????????????????????????????????????????????????????????????????????????????????????????????????????????????????????????????????????????????????????????????????????????????????????????????????????????????????????????????????????????????????????????????????????????????????????????????????????????????????????????????????????

*Entosphenus_minimus*  ????????????????????????????????????????????????????????????????????????????????????????????????????????????????????????????????????????????????????????????????????????????????????????????????????????????????????????????????????????????????????????????????????????????????????????????????????????????????????????????????????????????????????????????????????????????????????????????????????????????????????????????????????????????????????????????????????????????????????????????????????????????????????????????????????????????????????????????????????????????????????????????????????????????????????????????????????????????????????????????????????????????????????????????????????????????????????????????????????????????????????????????????????????????????????????????????????

*Entosphenus_similis* ????????????????????????????????????????????????????????????????????????????????????????????????????????????????????????????????????????????????????????????????????????????????????????????????????????????????????????????????????????????????????????????????????????????????????????????????????????????????????????????????????????????????????????????????????????????????????????????????????????????????????????????????????????????????????????????????????????????????????????????????????????????????????????????????????????????????????????????????????????????????????????????????????????????????????????????????????????????????????????????????????????????????????????????????????????????????????????????????????????????????????????????????????????????????????????????????????

*Entosphenus_tridentatus*  ????????????????????????????????????????????????????????????????????????????????????????????????????????????????????????????????????????????????????????????????????????????????????????????????????????????????????????????????????????????????????????????????????????????????????????????????????????????????????????????????????????????????????????????????????????????????????????????????????????????????????????????????????????????????????????????????????????????????????????????????????????????????????????????????????????????????????????????????????????????????????????????????????????????????????????????????????????????????????????????????????????????????????????????????????????????????????????????????????????????????????????????????????????????????????????????????????

*Eudontomyzon_danfordi*  ????????????????????????????????????????????????????????????????????????????????????????????????????????????????????????????????????????????????????????????????????????????????????????????????????????????????????????????????????????????????????????????????????????????????????????????????????????????????????????????????????????????????????????????????????????????????????????????????????????????????????????????????????????????????????????????????????????????????????????????????????????????????????????????????????????????????????????????????????????????????????????????????????????????????????????????????????????????????????????????????????????????????????????????????????????????????????????????????????????????????????????????????????????????????????????????????????

*Eudontomyzon_morii* ????????????????????????????????????????????????????????????????????????????????????????????????????????????????????????????????????????????????????????????????????????????????????????????????????????????????????????????????????????????????????????????????????????????????????????????????????????????????????????????????????????????????????????????????????????????????????????????????????????????????????????????????????????????????????????????????????????????????????????????????????????????????????????????????????????????????????????????????????????????????????????????????????????????????????????????????????????????????????????????????????????????????????????????????????????????????????????????????????????????????????????????????????????????????????????????????????

*Lampetra_ayresii*  ????????????????????????????????????????????????????????????????????????????????????????????????????????????????????????????????????????????????????????????????????????????????????????????????????????????????????????????????????????????????????????????????????????????????????????????????????????????????????????????????????????????????????????????????????????????????????????????????????????????????????????????????????????????????????????????????????????????????????????????????????????????????????????????????????????????????????????????????????????????????????????????????????????????????????????????????????????????????????????????????????????????????????????????????????????????????????????????????????????????????????????????????????????????????????????????????????

*Mesomyzon*  ????????????????????????????????????????????????????????????????????????????????????????????????????????????????????????????????????????????????????????????????????????????????????????????????????????????????????????????????????????????????????????????????????????????????????????????????????????????????????????????????????????????????????????????????????????????????????????????????????????????????????????????????????????????????????????????????????????????????????????????????????????????????????????????????????????????????????????????????????????????????????????????????????????????????????????????????????????????????????????????????????????????????????????????????????????????????????????????????????????????????????????????????????????????????????????????????????

*Yanliaomyzon_ingensdentes* ????????????????????????????????????????????????????????????????????????????????????????????????????????????????????????????????????????????????????????????????????????????????????????????????????????????????????????????????????????????????????????????????????????????????????????????????????????????????????????????????????????????????????????????????????????????????????????????????????????????????????????????????????????????????????????????????????????????????????????????????????????????????????????????????????????????????????????????????????????????????????????????????????????????????????????????????????????????????????????????????????????????????????????????????????????????????????????????????????????????????????????????????????????????????????????????????????

*Yanliaomyzon_occisor*  ????????????????????????????????????????????????????????????????????????????????????????????????????????????????????????????????????????????????????????????????????????????????????????????????????????????????????????????????????????????????????????????????????????????????????????????????????????????????????????????????????????????????????????????????????????????????????????????????????????????????????????????????????????????????????????????????????????????????????????????????????????????????????????????????????????????????????????????????????????????????????????????????????????????????????????????????????????????????????????????????????????????????????????????????????????????????????????????????????????????????????????????????????????????????????????????????????

*Priscomyzon*  ????????????????????????????????????????????????????????????????????????????????????????????????????????????????????????????????????????????????????????????????????????????????????????????????????????????????????????????????????????????????????????????????????????????????????????????????????????????????????????????????????????????????????????????????????????????????????????????????????????????????????????????????????????????????????????????????????????????????????????????????????????????????????????????????????????????????????????????????????????????????????????????????????????????????????????????????????????????????????????????????????????????????????????????????????????????????????????????????????????????????????????????????????????????????????????????????????

*Mayomyzon* ????????????????????????????????????????????????????????????????????????????????????????????????????????????????????????????????????????????????????????????????????????????????????????????????????????????????????????????????????????????????????????????????????????????????????????????????????????????????????????????????????????????????????????????????????????????????????????????????????????????????????????????????????????????????????????????????????????????????????????????????????????????????????????????????????????????????????????????????????????????????????????????????????????????????????????????????????????????????????????????????????????????????????????????????????????????????????????????????????????????????????????????????????????????????????????????????????

*Hardistiella*  ????????????????????????????????????????????????????????????????????????????????????????????????????????????????????????????????????????????????????????????????????????????????????????????????????????????????????????????????????????????????????????????????????????????????????????????????????????????????????????????????????????????????????????????????????????????????????????????????????????????????????????????????????????????????????????????????????????????????????????????????????????????????????????????????????????????????????????????????????????????????????????????????????????????????????????????????????????????????????????????????????????????????????????????????????????????????????????????????????????????????????????????????????????????????????????????????????

*Pipiscius* ????????????????????????????????????????????????????????????????????????????????????????????????????????????????????????????????????????????????????????????????????????????????????????????????????????????????????????????????????????????????????????????????????????????????????????????????????????????????????????????????????????????????????????????????????????????????????????????????????????????????????????????????????????????????????????????????????????????????????????????????????????????????????????????????????????????????????????????????????????????????????????????????????????????????????????????????????????????????????????????????????????????????????????????????????????????????????????????????????????????????????????????????????????????????????????????????????

[CO1, 721 sites]

*Euconodonta* ?????????????????????????????????????????????????????????????????????????????????????????????????????????????????????????????????????????????????????????????????????????????????????????????????????????????????????????????????????????????????????????????????????????????????????????????????????????????????????????????????????????????????????????????????????????????????????????????????????????????????????????????????????????????????????????????????????????????????????????????????????????????????????????????????????????????????????????????????????????????????????????????????????????????????????????????????????????????????????????????????????????????????????????????????????????????????????????????????????????????????

*Jamoytius* ?????????????????????????????????????????????????????????????????????????????????????????????????????????????????????????????????????????????????????????????????????????????????????????????????????????????????????????????????????????????????????????????????????????????????????????????????????????????????????????????????????????????????????????????????????????????????????????????????????????????????????????????????????????????????????????????????????????????????????????????????????????????????????????????????????????????????????????????????????????????????????????????????????????????????????????????????????????????????????????????????????????????????????????????????????????????????????????????????????????????????

*Euphanerops*  ?????????????????????????????????????????????????????????????????????????????????????????????????????????????????????????????????????????????????????????????????????????????????????????????????????????????????????????????????????????????????????????????????????????????????????????????????????????????????????????????????????????????????????????????????????????????????????????????????????????????????????????????????????????????????????????????????????????????????????????????????????????????????????????????????????????????????????????????????????????????????????????????????????????????????????????????????????????????????????????????????????????????????????????????????????????????????????????????????????????????????

*Achanarella*  ?????????????????????????????????????????????????????????????????????????????????????????????????????????????????????????????????????????????????????????????????????????????????????????????????????????????????????????????????????????????????????????????????????????????????????????????????????????????????????????????????????????????????????????????????????????????????????????????????????????????????????????????????????????????????????????????????????????????????????????????????????????????????????????????????????????????????????????????????????????????????????????????????????????????????????????????????????????????????????????????????????????????????????????????????????????????????????????????????????????????????

*Ciderius* ?????????????????????????????????????????????????????????????????????????????????????????????????????????????????????????????????????????????????????????????????????????????????????????????????????????????????????????????????????????????????????????????????????????????????????????????????????????????????????????????????????????????????????????????????????????????????????????????????????????????????????????????????????????????????????????????????????????????????????????????????????????????????????????????????????????????????????????????????????????????????????????????????????????????????????????????????????????????????????????????????????????????????????????????????????????????????????????????????????????????????

*Cornovichthys* ?????????????????????????????????????????????????????????????????????????????????????????????????????????????????????????????????????????????????????????????????????????????????????????????????????????????????????????????????????????????????????????????????????????????????????????????????????????????????????????????????????????????????????????????????????????????????????????????????????????????????????????????????????????????????????????????????????????????????????????????????????????????????????????????????????????????????????????????????????????????????????????????????????????????????????????????????????????????????????????????????????????????????????????????????????????????????????????????????????????????????

*Lasanius*  ?????????????????????????????????????????????????????????????????????????????????????????????????????????????????????????????????????????????????????????????????????????????????????????????????????????????????????????????????????????????????????????????????????????????????????????????????????????????????????????????????????????????????????????????????????????????????????????????????????????????????????????????????????????????????????????????????????????????????????????????????????????????????????????????????????????????????????????????????????????????????????????????????????????????????????????????????????????????????????????????????????????????????????????????????????????????????????????????????????????????????

*Birkenia*  ?????????????????????????????????????????????????????????????????????????????????????????????????????????????????????????????????????????????????????????????????????????????????????????????????????????????????????????????????????????????????????????????????????????????????????????????????????????????????????????????????????????????????????????????????????????????????????????????????????????????????????????????????????????????????????????????????????????????????????????????????????????????????????????????????????????????????????????????????????????????????????????????????????????????????????????????????????????????????????????????????????????????????????????????????????????????????????????????????????????????????

*Rhyncholepis*  ?????????????????????????????????????????????????????????????????????????????????????????????????????????????????????????????????????????????????????????????????????????????????????????????????????????????????????????????????????????????????????????????????????????????????????????????????????????????????????????????????????????????????????????????????????????????????????????????????????????????????????????????????????????????????????????????????????????????????????????????????????????????????????????????????????????????????????????????????????????????????????????????????????????????????????????????????????????????????????????????????????????????????????????????????????????????????????????????????????????????????

*Myxinikela* ?????????????????????????????????????????????????????????????????????????????????????????????????????????????????????????????????????????????????????????????????????????????????????????????????????????????????????????????????????????????????????????????????????????????????????????????????????????????????????????????????????????????????????????????????????????????????????????????????????????????????????????????????????????????????????????????????????????????????????????????????????????????????????????????????????????????????????????????????????????????????????????????????????????????????????????????????????????????????????????????????????????????????????????????????????????????????????????????????????????????????

*Tethymyxine* ?????????????????????????????????????????????????????????????????????????????????????????????????????????????????????????????????????????????????????????????????????????????????????????????????????????????????????????????????????????????????????????????????????????????????????????????????????????????????????????????????????????????????????????????????????????????????????????????????????????????????????????????????????????????????????????????????????????????????????????????????????????????????????????????????????????????????????????????????????????????????????????????????????????????????????????????????????????????????????????????????????????????????????????????????????????????????????????????????????????????????

*Paramyxine_fernholmi* -------------------CACAAAGACATTGGCACCCTTTACCTAATTTTTGGTGCATGAGCCGGAATAATCGGAACAGCTTTAAGTGTAATTATTCGAACAGAACTAAGCCAACCAGGACCTTTAATTAACAATGACC----------AACTTTATAATACAATCATTACAGCCCATGCATTCATTATAATTTTCTTTATAGTTATACCAATTATAATTGGTGGTTTCGGAAACTGATTAGTACCATTAATAATTGGTGCACCAGACATAGCAT--TTCCACGAATAAACAATATAAGCTTCTGACTTCTTCCACCTTCACTCCTTCTTTTACTCTCATCTTCCATAATTAGCTCTG---GTGCAGGAACTGGGTGAACTGTTTACCCACCCCTTTCAAATCATATTTCACATATAGGTCCATCAGTAGACTTAACTATTTTCTCACTACACCTAGCAGGTGTTTCCTCCATTTTAGGAGCGATCAACTTTATCACTACTATTATTAACATAAAAATACAATCAATAACCATATACCACATCCCCTTATTTGTGTGATCAATTTTAATTACCACAATTTTACTTCTTCTTTCCCTGCCAGTTTTAGCTGCTGCTATTACTATGCTGCTCACTGATCGTAATCTCAACACTACCTTTTTTGACCCTTCTGGCGGAGGAGACCCTATCCTTTATCAACACCTTTTCTGATTCTTTGGCCAC

*Eptatretus_burgeri* ATGATTATTTTCTACTAATCACAAAGACATTGGCACCCTTTACCTAATTTTTGGTGCATGAGCCGGAATAATCGGAACAGCTTTAAGTGTAATTATTCGAACAGAACTAAGCCAACCAGGACCCTTAATCAACAATGACC----------AGCTTTATAATACAATCATTACAGCCCATGCATTTATTATAATTTTCTTCATAGTTATACCAATTATGATTGGAGGTTTCGGAAATTGATTAGTCCCACTAATAATTGGTGCGCCAGACATAGCAT--TTCCACGAATAAATAATATAAGCTTTTGACTTTTACCACCTTCACTCCTTCTATTACTTTCATCTTCCATAATTAGTTCTG---GTGCAGGAACTGGGTGAACTGTCTACCCACCCCTTTCAAATCATATTTCACATATAGGCCCATCAGTAGACTTAACCATTTTCTCACTACACCTAGCAGGTGTTTCTTCAATTTTAGGAGCAATCAACTTTATCACTACTATCATTAACATAAAAATACAGTCAATAACCATATACCATATTCCATTATTTGTTTGATCAATTCTAATTACCACAATTTTACTTCTTCTTTCCCTTCCAGTTTTAGCCGCTGCTATCACTATACTACTTACTGATCGTAACCTTAATACCACTTTTTTTGATCCCTCCGGTGGAGGAGACCCTATCCTTTATCAACATCTTTTCTGATTTTTTGGACAT

*Eptatretus_stoutii* ------------------------------------CCTTTATCTAATTTTTGGTGCATGAGCCGGAATAATCGGAACAGCTTTAAGTGTAATTATTCGAACAGAATTAAGCCAACCAGGGCCCTTAATTAACAATGACC----------AACTTTATAATACAATCATCACAGCCCATGCATTCATTATAATTTTCTTCATAGTTATACCAATTATAATTGGTGGTTTTGGAAACTGACTAGTACCATTAATAATTGGTGCACCAGATATAGCAT--TCCCACGAATAAACAATATAAGCTTCTGACTTCTTCCCCCTTCACTCCTTCTTCTACTTTCATCTTCCATAATTAGTTCTG---GTGCAGGAACTGGGTGAACTGTTTACCCACCCCTTTCAAATCATATTTCACATATAGGCCCATCAGTAGATTTAACTATTTTCTCACTACACCTAGCAGGTGTTTCTTCCATTTTAGGAGCAATCAACTTTATCACTACTATTATCAACATAAAAATACAATCAATAACCATATATCACATCCCATTATTTGTATGATCAATCCTAATCACCACAATTTTACTTCTCCTTTCCCTGCCAGTTTTAGCTGCTGCCATCACTATACTACTTACTGATCGTAATCTCAATACTACCTTTTTCGATCCTTCTGGTGGAGGAGATCCTATCCTTTATCAACACCT-------------------

*Myxine_glutinosa* ATGATTTTTCTCCACCAATCATAAAGACATTGGTACCCTTTACCTTATTTTCGGGGCCTGAGCCGGAATAATTGGCACAGCCCTTAGCGTAATCATCCGAACAGAGTTGAGTCAGCCAGGATCCTTAATCAATAATGACC----------AACTCTATAATACAATTATCACAGCCCACGCATTTGTAATAATCTTTTTTATAGTAATACCTATCATAATCGGGGGCTTTGGGAACTGACTAGTCCCAATAATAATCGGCGCCCCTGATATAGCAT--TTCCCCGAATAAACAATATAAGCTTCTGACTTTTGCCCCCATCACTTATACTATTACTCTCCTCCTCACTAGTAAGCTCTG---GAGCAGGAACTGGATGAACAGTTTATCCCCCTCTCTCTAATCACATTTCTCACATAGGCCCTTCAGTAGACCTAGCTATTTTCTCCCTTCATCTAGCAGGAGTTTCCTCAATCTTAGGGGCAATCAACTTTATCACAACAATTATTAACATAAAAACACGGTCTATAGAAATATACCATATCCCATTATTTGTATGATCAATTCTAATCACCGCAATCCTACTTCTTTTATCCTTACCTGTTTTAGCCGCAGCTATCACTATACTCCTCACAGACCGTAATCTCAACACCACCTTCTTTGACCCCTCTGGTGGAGGGGATCCCATCCTCTATCAGCATTTATTTTGATTTTTTGGCCAC

*Rubicundus_eos* ?????????????????????????????????????????????????????????????????????????????????????????????????????????????????????????????????????????????????????????????????????????????????????????????????????????????????????????????????????????????????????????????????????????????????????????????????????????????????????????????????????????????????????????????????????????????????????????????????????????????????????????????????????????????????????????????????????????????????????????????????????????????????????????????????????????????????????????????????????????????????????????????????????????????????????????????????????????????????????????????????????????????????????????????????????????????????????????????????????????????????

*Rubicundus_lopheliae*  -------------------CACAAAGACATTGGCACCCTCTATCTTATCTTTGGTGCATGAGCTGGAATAATTGGAACAGGTCTTAGTGTAATTATTCGTACAGAATTAAGCCAACCTGGACCCCTTATTAATAATGATC----------AACTTTATAATACAGTAATTACAGCTCATGCTTTTATTATAATTTTCTTTATAGTTATACCAGTCATAATTGGGGGATTTGGAAACTGATTAGTTCCTCTAATAATTGGAGCTCCAGATATAGCAT--TTCCTCGAATAAACAATATAAGCTTCTGACTTTTACCGCCTTCCCTCCTTCTTCTACTTTCTTCCTCTATAGTCGGATCAG---GGGCAGGCACAGGATGAACAGTATATCCGCCTCTTTCCAACCATATTTCACATATAGGACCATCAGTCGATCTAACTATTTTCTCCCTCCATTTAGCAGGTGTATCTTCTATTTTAGGAGCAATTAATTTTATTACCACAATCATCAACATGAAAATACAATCTATAACTATATATCATATCCCATTATTTGTTTGATCAGTCCTGATTACCGCAATTCTTCTTCTTTTATCCTTACCTGTTTTAGCAGCAGCTATTACTATACTTCTTACAGATCGAAATTTAAACACTACTTTTTTTGATCCTTCTGGTGGAGGAGACCCTATTCTTTACCAACACCTATTCTGATTCTTTGGCCAC

*Neomyxine_biniplicata* -------------------CACAAAGACATTGGCACCCTTTACCTTATCTTTGGTGCTTGGGCCGGAATAATTGGCACAGCCCTTAGTGTAATTATTCGAACAGAGCTAAGTCAGCCTGGTGCCTTAATCGACAATGAGC----------AGCTTTATAACACAATTATTACAGCACATGCATTTATTATAATCTTCTTTATAGTTATACCGATCATAATCGGGGGGTTTGGAAACTGATTAGTCCCTTTAATAATTGGGGCACCAGACATAGCCT--TCCCTCGAATAAACAACATAAGCTTCTGATTACTTCCTCCATCACTCTTACTCTTACTTTCCTCTTCCCTTATCAGCACCG---GGGCAGGAACTGGTTGAACAGTTTACCCGCCTCTCTCTAACCATATCTCACATATAGGACCCTCGGTAGATTTAGCTATCTTTTCCTTACACTTAGCGGGAGTATCCTCAATCTTAGGGGCAATTAATTTTATTACTACAATTATTAACATAAAAATACAACCTATAGACATGTATAACACCCCTCTATTCGTATGATCAATCTTCATTACTGCTATTTTACTCCTACTCTCACTACCAGTATTAGCTGCTGCTGTTACAATACTACTTACAGACCGTAACCTAAATACTACATTCTTCGATCCTGCCGGCGGTGGGGATCCAATTCTCTACCAACACCTATTCTGATTCTTTGGCCAC

*Myxineidus*  ?????????????????????????????????????????????????????????????????????????????????????????????????????????????????????????????????????????????????????????????????????????????????????????????????????????????????????????????????????????????????????????????????????????????????????????????????????????????????????????????????????????????????????????????????????????????????????????????????????????????????????????????????????????????????????????????????????????????????????????????????????????????????????????????????????????????????????????????????????????????????????????????????????????????????????????????????????????????????????????????????????????????????????????????????????????????????????????????????????????????????

*Gilpichthys*  ?????????????????????????????????????????????????????????????????????????????????????????????????????????????????????????????????????????????????????????????????????????????????????????????????????????????????????????????????????????????????????????????????????????????????????????????????????????????????????????????????????????????????????????????????????????????????????????????????????????????????????????????????????????????????????????????????????????????????????????????????????????????????????????????????????????????????????????????????????????????????????????????????????????????????????????????????????????????????????????????????????????????????????????????????????????????????????????????????????????????????

*Lethenteron_camtschaticum* TTGATTATTCTCTACTAATCATAAAGACATCGGCACCCTATATCTAATTTTTGGGGCCTGAGCAGGAATAGTGGGAACCGCTTTAAGCATCCTAATTCGAGCAGAACTCAGTCAACCGGGCACTTTACTAGGAGATGACC----------AGATCTTTAATGTTATCGTAACCGCTCATGCTTTCGTTATAATTTTTTTTATAGTCATACCAATTATAATCGGAGGCTTCGGAAACTGACTTGTGCCTATAATACTTAGCGCCCCTGATATAGCCT--TCCCACGTATAAATAACATAAGCTTTTGACTGCTCCCACCATCCCTACTCTTACTTTTAGCTTCCGCAGGAGTTGAAGCAG---GAGCCGGAACTGGATGAACAGTATACCCACCTCTAGCAGGAAATTTAGCCCACACAGGGGCCTCTGTTGACTTAACAATTTTCTCCCTTCATCTAGCCGGTATTTCATCAATCCTTGGGGCAGTCAACTTTATTACAACAATTTTTAACATAAAACCTCCAACTATAACACAATACCAAACCCCATTATTTGTTTGATCCGTTTTAATTACTGCAGTCCTCCTTCTTCTATCACTTCCTGTACTTGCAGCTGCCATCACTATACTTTTAACAGATCGTAATTTAAATACATCCTTCTTTGACCCTGCAGGAGGAGGAGACCCAATCCTTTACCAACACCTGTTCTGATTCTTTGGGCAC

*Petromyzon_marinus* TTGATTATTCTCTACTAATCACAAAGACATCGGCACCCTATATCTAATTTTCGGGGCCTGAGCAGGAATAGTAGGAACTGCTTTAAGTATTCTAATTCGAGCTGAACTAAGTCAGCCAGGCACTTTATTAGGAGACGACC----------AAATTTTTAATGTTATCGTAACTGCCCATGCCTTCGTCATAATCTTTTTTATAGTTATACCAATTATAATTGGAGGCTTTGGCAACTGACTTGTACCCCTAATACTTGGTGCTCCTGATATGGCCT--TCCCTCGTATAAACAACATAAGTTTTTGACTACTTCCGCCCTCTTTACTTTTACTCTTAGCCTCTGCAGGAGTTGAAGCTG---GGGCAGGAACAGGATGAACTGTATATCCTCCCTTAGCCGGAAACCTAGCCCACACCGGGGCCTCTGTCGACCTAACAATCTTTTCCTTACACTTAGCCGGAGTTTCATCAATTCTAGGAGCAGTTAATTTCATCACAACTATTTTTAACATGAAACCCCCAACTATGACTCAATACCAAACCCCCTTATTTGTTTGATCAGTCTTAATCACTGCAGTTCTTCTTCTTCTATCTCTACCAGTACTAGCAGCTGCTATCACAATACTTCTAACAGATCGTAACTTAAATACATCCTTCTTCGACCCTGCAGGAGGAGGAGACCCCATTCTTTACCAACACTTATTTTGATTCTTCGGACAC

*Lampetra_fluviatilis* TTGATTATTCTCTACTAATCATAAAGACATCGGCACCCTATATCTAATCTTTGGGGCCTGAGCAGGAATAGTGGGAACTGCTTTAAGCATCCTAATTCGGGCAGAATTAAGTCAACCAGGCACTTTACTAGGAGACGATC----------AAATCTTTAACGTTATCGTAACCGCCCATGCTTTCGTTATAATCTTTTTTATAGTTATACCAATTATAATCGGAGGCTTCGGAAACTGACTTGTACCAATAATACTTAGCGCCCCAGATATAGCCT--TCCCACGTATAAACAACATAAGCTTTTGACTACTTCCACCCTCACTCCTTCTACTTTTAGCTTCCGCAGGAGTTGAAGCAG---GGGCCGGAACGGGATGAACCGTATACCCACCCCTAGCAGGAAATTTAGCCCACACAGGGGCCTCTGTTGACTTAACAATTTTCTCCCTTCACCTAGCTGGTATTTCATCAATTCTAGGGGCAGTCAACTTTATTACAACAATTTTTAATATAAAGCCCCCAACTATAACACAATACCAAATTCCTTTATTTGTTTGATCCGTTTTAATTACTGCAGTCCTCCTTCTTCTATCACTTCCTGTACTTGCAGCCGCCATTACTATACTTTTAACAGATCGTAATTTAAATACATCTTTCTTCGACCCTGCAGGGGGAGGAGACCCAATTCTTTACCAACACCTATTTTGATTCTTTGGACAT

*Geotria_australis*  TTGATTATTCTCCACTAATCACAAAGACATCGGCACCCTCTATCTTATCTTTGGGGCCTGAGCAGGAATAGTAGGAACCGCACTAAGTATCCTAATTCGAGCAGAACTAAGCCAACCCGGCACGCTATTAGGTGATGACC----------AAATCTACAATGTCATTGTTACAGCCCATGCTTTTGTTATAATTTTCTTTATAGTTATACCAATCATAATCGGAGGCTTTGGTAATTGATTAATTCCCCTAATACTTGGTGCCCCAGACATGGCAT--TCCCCCGAATAAATAACATAAGCTTCTGACTTCTACCCCCATCCCTTCTACTTCTTTTAGCCTCTTCAGGGGTCGAAGCCG---GAGCAGGTACAGGTTGGACAGTATACCCCCCGCTAGCAGGGAATCTTGCACACATAGGAGCCTCCGTTGACTTAACAATTTTCTCGCTACATCTTGCCGGGATCTCCTCAATTTTAGGAGCAATTAACTTCATTACTACTATTTTCAATATAAAACCCCCAACTATAACACAGTACCAAACACCCCTATTCGTGTGATCTGTATTAATTACCGCAGTTCTTCTCCTACTTGCACTACCAGTTCTAGCGGCTGCCATTACAATATTACTGACAGATCGAAATTTAAATACAGCCTTTTTCGACCCTGCTGGGGGAGGAGATCCCATTCTTTACCAACATTTATTCTGATTCTTCGGACAC

*Ichthyomyzon_bdellium* ?????????????????????????????????????????????????????????????????????????????????????????????????????????????????????????????????????????????????????????????????????????????????????????????????????????????????????????????????????????????????????????????????????????????????????????????????????????????????????????????????????????????????????????????????????????????????????????????????????????????????????????????????????????????????????????????????????????????????????????????????????????????????????????????????????????????????????????????????????????????????????????????????????????????????????????????????????????????????????????????????????????????????????????????????????????????????????????????????????????????????

*Ichthyomyzon_castaneus* ?????????????????????????????????????????????????????????????????????????????????????????????????????????????????????????????????????????????????????????????????????????????????????????????????????????????????????????????????????????????????????????????????????????????????????????????????????????????????????????????????????????????????????????????????????????????????????????????????????????????????????????????????????????????????????????????????????????????????????????????????????????????????????????????????????????????????????????????????????????????????????????????????????????????????????????????????????????????????????????????????????????????????????????????????????????????????????????????????????????????????

*Ichthyomyzon_unicuspis* ?????????????????????????????????????????????????????????????????????????????????????????????????????????????????????????????????????????????????????????????????????????????????????????????????????????????????????????????????????????????????????????????????????????????????????????????????????????????????????????????????????????????????????????????????????????????????????????????????????????????????????????????????????????????????????????????????????????????????????????????????????????????????????????????????????????????????????????????????????????????????????????????????????????????????????????????????????????????????????????????????????????????????????????????????????????????????????????????????????????????????

*Mordacia_mordax*  ------------------------------------CCTTTATTTAATCTTCGGGGCTTGAGCAGGAATAGTAGGAACAGCATTAAGCATTCTAATCCGAGCAGAACTAAGTCAACCAGGAACGCTCCTAGGTGATGATC----------AAATCTACAATGTAATTGTTACAGCTCATGCTTTTATTATAATTTTTTTCATGGTAATACCCATCATAATAGGAGGCTTTGGGAATTGATTAACTCCTTTAATACTAGGTGCCCCAGATATAGCAT--TTCCTCGAATAAATAACATAAGTTTCTGACTTCTCCCTCCTTCCCTCCTTCTTCTCTTAGCATCTTCAGGTGTTGAAGCAG---GAGTAGGTACAGGCTGAACAGTCTATCCACCACTAGCAGGAAACTTAGCTCACACAGGAGCCTCTGTAGACTTGGCCATCTTTTCCCTACACCTTGCAGGTGTGTCATCAATTTTAGGAGCCATTAATTTTATCACAACAATTTTCAACATAAAACCCCCAACTATAACTATATATCACGTACCACTATTTATTTGATCAGTGTTAATTACAGCTGTTCTTCTTCTTCTTTCACTCCCAGTTTTAGCCGCAGCTATTACAATACTACTAACAGACCGTAATCTAAATACAACCTTCTTTGACCCAGCAGGTGGAGGAGACCCTATCTTATACCAACACCTA------------------

*Mordacia_lapicida*  ?????????????????????????????????????????????????????????????????????????????????????????????????????????????????????????????????????????????????????????????????????????????????????????????????????????????????????????????????????????????????????????????????????????????????????????????????????????????????????????????????????????????????????????????????????????????????????????????????????????????????????????????????????????????????????????????????????????????????????????????????????????????????????????????????????????????????????????????????????????????????????????????????????????????????????????????????????????????????????????????????????????????????????????????????????????????????????????????????????????????????

*Caspiomyzon_wagneri*  ?????????????????????????????????????????????????????????????????????????????????????????????????????????????????????????????????????????????????????????????????????????????????????????????????????????????????????????????????????????????????????????????????????????????????????????????????????????????????????????????????????????????????????????????????????????????????????????????????????????????????????????????????????????????????????????????????????????????????????????????????????????????????????????????????????????????????????????????????????????????????????????????????????????????????????????????????????????????????????????????????????????????????????????????????????????????????????????????????????????????????

*Tetrapleurodon_spadiceus*  ?????????????????????????????????????????????????????????????????????????????????????????????????????????????????????????????????????????????????????????????????????????????????????????????????????????????????????????????????????????????????????????????????????????????????????????????????????????????????????????????????????????????????????????????????????????????????????????????????????????????????????????????????????????????????????????????????????????????????????????????????????????????????????????????????????????????????????????????????????????????????????????????????????????????????????????????????????????????????????????????????????????????????????????????????????????????????????????????????????????????????

*Entosphenus_macrostomus* ?????????????????????????????????????????????????????????????????????????????????????????????????????????????????????????????????????????????????????????????????????????????????????????????????????????????????????????????????????????????????????????????????????????????????????????????????????????????????????????????????????????????????????????????????????????????????????????????????????????????????????????????????????????????????????????????????????????????????????????????????????????????????????????????????????????????????????????????????????????????????????????????????????????????????????????????????????????????????????????????????????????????????????????????????????????????????????????????????????????????????

*Entosphenus_minimus* ?????????????????????????????????????????????????????????????????????????????????????????????????????????????????????????????????????????????????????????????????????????????????????????????????????????????????????????????????????????????????????????????????????????????????????????????????????????????????????????????????????????????????????????????????????????????????????????????????????????????????????????????????????????????????????????????????????????????????????????????????????????????????????????????????????????????????????????????????????????????????????????????????????????????????????????????????????????????????????????????????????????????????????????????????????????????????????????????????????????????????

*Entosphenus_similis* ?????????????????????????????????????????????????????????????????????????????????????????????????????????????????????????????????????????????????????????????????????????????????????????????????????????????????????????????????????????????????????????????????????????????????????????????????????????????????????????????????????????????????????????????????????????????????????????????????????????????????????????????????????????????????????????????????????????????????????????????????????????????????????????????????????????????????????????????????????????????????????????????????????????????????????????????????????????????????????????????????????????????????????????????????????????????????????????????????????????????????

*Entosphenus_tridentatus* ?????????????????????????????????????????????????????????????????????????????????????????????????????????????????????????????????????????????????????????????????????????????????????????????????????????????????????????????????????????????????????????????????????????????????????????????????????????????????????????????????????????????????????????????????????????????????????????????????????????????????????????????????????????????????????????????????????????????????????????????????????????????????????????????????????????????????????????????????????????????????????????????????????????????????????????????????????????????????????????????????????????????????????????????????????????????????????????????????????????????????

*Eudontomyzon_danfordi* ?????????????????????????????????????????????????????????????????????????????????????????????????????????????????????????????????????????????????????????????????????????????????????????????????????????????????????????????????????????????????????????????????????????????????????????????????????????????????????????????????????????????????????????????????????????????????????????????????????????????????????????????????????????????????????????????????????????????????????????????????????????????????????????????????????????????????????????????????????????????????????????????????????????????????????????????????????????????????????????????????????????????????????????????????????????????????????????????????????????????????

*Eudontomyzon_morii* ?????????????????????????????????????????????????????????????????????????????????????????????????????????????????????????????????????????????????????????????????????????????????????????????????????????????????????????????????????????????????????????????????????????????????????????????????????????????????????????????????????????????????????????????????????????????????????????????????????????????????????????????????????????????????????????????????????????????????????????????????????????????????????????????????????????????????????????????????????????????????????????????????????????????????????????????????????????????????????????????????????????????????????????????????????????????????????????????????????????????????

*Lampetra_ayresii* ?????????????????????????????????????????????????????????????????????????????????????????????????????????????????????????????????????????????????????????????????????????????????????????????????????????????????????????????????????????????????????????????????????????????????????????????????????????????????????????????????????????????????????????????????????????????????????????????????????????????????????????????????????????????????????????????????????????????????????????????????????????????????????????????????????????????????????????????????????????????????????????????????????????????????????????????????????????????????????????????????????????????????????????????????????????????????????????????????????????????????

*Mesomyzon* ?????????????????????????????????????????????????????????????????????????????????????????????????????????????????????????????????????????????????????????????????????????????????????????????????????????????????????????????????????????????????????????????????????????????????????????????????????????????????????????????????????????????????????????????????????????????????????????????????????????????????????????????????????????????????????????????????????????????????????????????????????????????????????????????????????????????????????????????????????????????????????????????????????????????????????????????????????????????????????????????????????????????????????????????????????????????????????????????????????????????????

*Yanliaomyzon_igensdentes* ?????????????????????????????????????????????????????????????????????????????????????????????????????????????????????????????????????????????????????????????????????????????????????????????????????????????????????????????????????????????????????????????????????????????????????????????????????????????????????????????????????????????????????????????????????????????????????????????????????????????????????????????????????????????????????????????????????????????????????????????????????????????????????????????????????????????????????????????????????????????????????????????????????????????????????????????????????????????????????????????????????????????????????????????????????????????????????????????????????????????????

*Yanliaomyzon_occisor* ?????????????????????????????????????????????????????????????????????????????????????????????????????????????????????????????????????????????????????????????????????????????????????????????????????????????????????????????????????????????????????????????????????????????????????????????????????????????????????????????????????????????????????????????????????????????????????????????????????????????????????????????????????????????????????????????????????????????????????????????????????????????????????????????????????????????????????????????????????????????????????????????????????????????????????????????????????????????????????????????????????????????????????????????????????????????????????????????????????????????????

*Priscomyzon* ?????????????????????????????????????????????????????????????????????????????????????????????????????????????????????????????????????????????????????????????????????????????????????????????????????????????????????????????????????????????????????????????????????????????????????????????????????????????????????????????????????????????????????????????????????????????????????????????????????????????????????????????????????????????????????????????????????????????????????????????????????????????????????????????????????????????????????????????????????????????????????????????????????????????????????????????????????????????????????????????????????????????????????????????????????????????????????????????????????????????????

*Mayomyzon*  ?????????????????????????????????????????????????????????????????????????????????????????????????????????????????????????????????????????????????????????????????????????????????????????????????????????????????????????????????????????????????????????????????????????????????????????????????????????????????????????????????????????????????????????????????????????????????????????????????????????????????????????????????????????????????????????????????????????????????????????????????????????????????????????????????????????????????????????????????????????????????????????????????????????????????????????????????????????????????????????????????????????????????????????????????????????????????????????????????????????????????

*Hardistiella*  ?????????????????????????????????????????????????????????????????????????????????????????????????????????????????????????????????????????????????????????????????????????????????????????????????????????????????????????????????????????????????????????????????????????????????????????????????????????????????????????????????????????????????????????????????????????????????????????????????????????????????????????????????????????????????????????????????????????????????????????????????????????????????????????????????????????????????????????????????????????????????????????????????????????????????????????????????????????????????????????????????????????????????????????????????????????????????????????????????????????????????

*Pipiscius* ?????????????????????????????????????????????????????????????????????????????????????????????????????????????????????????????????????????????????????????????????????????????????????????????????????????????????????????????????????????????????????????????????????????????????????????????????????????????????????????????????????????????????????????????????????????????????????????????????????????????????????????????????????????????????????????????????????????????????????????????????????????????????????????????????????????????????????????????????????????????????????????????????????????????????????????????????????????????????????????????????????????????????????????????????????????????????????????????????????????????????

;

End;

**Extended Data File 2: Total-evidence analyses command and log file**

MrBayes 3.2.7b x86_64

(Bayesian Analysis of Phylogeny)

(Parallel version)

(8 processors available)

Distributed under the GNU General Public License

Type "help" or "help <command>" for information

on the commands that are available.

Type "about" for authorship and general

information about the program.

Executing file "run.nex"

UNIX line termination

Longest line length = 79

Parsing file

Expecting NEXUS formatted file

Reading mrbayes block

Executing file "../data/morph_molec.nex"...

UNIX line termination

Longest line length = 801

Parsing file

Expecting NEXUS formatted file

Reading data block

Allocated taxon set

Allocated matrix

Defining new matrix with 45 taxa and 1701 characters

Data is Mixed

Data for partition 1 is Standard

Data for partition 2 is Dna

There are a total of 2 default data divisions

Data matrix is interleaved

Gaps coded as -

Missing data coded as ?

Taxon 1 -> Euconodonta

Taxon 2 -> Jamoytius

Taxon 3 -> Euphanerops

Taxon 4 -> Achanarella

Taxon 5 -> Ciderius

Taxon 6 -> Cornovichthys

Taxon 7 -> Lasanius

Taxon 8 -> Birkenia

Taxon 9 -> Rhyncholepis

Taxon 10 -> Myxinikela

Taxon 11 -> Tethymyxine

Taxon 12 -> Paramyxine_fernholmi

Taxon 13 -> Eptatretus_burgeri

Taxon 14 -> Eptatretus_stoutii

Taxon 15 -> Myxine_glutinosa

Taxon 16 -> Rubicundus_eos

Taxon 17 -> Rubicundus_lopheliae

Taxon 18 -> Neomyxine_biniplicata

Taxon 19 -> Myxineidus

Taxon 20 -> Gilpichthys

Taxon 21 -> Lethenteron_camtschaticum

Taxon 22 -> Petromyzon_marinus

Taxon 23 -> Lampetra_fluviatilis

Taxon 24 -> Geotria_australis

Taxon 25 -> Ichthyomyzon_bdellium

Taxon 26 -> Ichthyomyzon_castaneus

Taxon 27 -> Ichthyomyzon_unicuspis

Taxon 28 -> Mordacia_mordax

Taxon 29 -> Mordacia_lapicida

Taxon 30 -> Caspiomyzon_wagneri

Taxon 31 -> Tetrapleurodon_spadiceus

Taxon 32 -> Entosphenus_macrostomus

Taxon 33 -> Entosphenus_minimus

Taxon 34 -> Entosphenus_similis

Taxon 35 -> Entosphenus_tridentatus

Taxon 36 -> Eudontomyzon_danfordi

Taxon 37 -> Eudontomyzon_morii

Taxon 38 -> Lampetra_ayresii

Taxon 39 -> Mesomyzon

Taxon 40 -> Yanliaomyzon_igensdentes

Taxon 41 -> Yanliaomyzon_occisor

Taxon 42 -> Priscomyzon

Taxon 43 -> Mayomyzon

Taxon 44 -> Hardistiella

Taxon 45 -> Pipiscius

Successfully read matrix

Setting default partition, dividing characters into 2 parts

Setting model defaults

Seed (for generating default start values) = 1654745601

WARNING: There are 76 characters incompatible with the specified

coding bias. These characters will be excluded.

Setting output file names to "../data/morph_molec.nex.run<i>.<p|t>"

Exiting data block

Reached end of file

Returning execution to calling file ...

Defining charset called 'MVothers'

Defining charset called 'BranchialApparatus'

Defining charset called 'FeedingMechanism'

Defining charset called '16S'

Defining charset called 'CO1'

Defining partition called 'five'

Setting five as the partition, dividing characters into 5 parts.

Setting model defaults

Seed (for generating default start values) = 235116259

WARNING: There are 61 characters incompatible with the specified

coding bias. These characters will be excluded.

WARNING: There are 10 characters incompatible with the specified

coding bias. These characters will be excluded.

WARNING: There are 5 characters incompatible with the specified

coding bias. These characters will be excluded.

Enabling Coding Variable for partition 1

Enabling Coding Variable for partition 2

Enabling Coding Variable for partition 3

Setting Rates to Gamma for partition 1

Setting Rates to Gamma for partition 2

Setting Rates to Gamma for partition 3

Successfully set likelihood model parameters to

partitions 1, 2, and 3 (if applicable)

WARNING: There are 61 characters incompatible with the specified

coding bias. These characters will be excluded.

WARNING: There are 10 characters incompatible with the specified

coding bias. These characters will be excluded.

WARNING: There are 5 characters incompatible with the specified

coding bias. These characters will be excluded.

Setting Nst to 2 for partition 4

Setting Nst to 2 for partition 5

Setting Rates to Gamma for partition 4

Setting Rates to Gamma for partition 5

Successfully set likelihood model parameters to

partitions 4 and 5 (if applicable)

WARNING: There are 61 characters incompatible with the specified

coding bias. These characters will be excluded.

WARNING: There are 10 characters incompatible with the specified

coding bias. These characters will be excluded.

WARNING: There are 5 characters incompatible with the specified

coding bias. These characters will be excluded.

Unlinking

WARNING: There are 61 characters incompatible with the specified

coding bias. These characters will be excluded.

WARNING: There are 10 characters incompatible with the specified

coding bias. These characters will be excluded.

WARNING: There are 5 characters incompatible with the specified

coding bias. These characters will be excluded.

Setting Ratepr to Variable [Dirichlet(..,1,..)] for partition 1

Setting Ratepr to Variable [Dirichlet(..,1,..)] for partition 2

Setting Ratepr to Variable [Dirichlet(..,1,..)] for partition 3

Setting Ratepr to Variable [Dirichlet(..,1,..)] for partition 4

Setting Ratepr to Variable [Dirichlet(..,1,..)] for partition 5

Successfully set prior model parameters to all

applicable data partitions

WARNING: There are 61 characters incompatible with the specified

coding bias. These characters will be excluded.

WARNING: There are 10 characters incompatible with the specified

coding bias. These characters will be excluded.

WARNING: There are 5 characters incompatible with the specified

coding bias. These characters will be excluded.

Defining constraint called 'ingroup'

Setting Clockratepr to Lognormal(-6.00,1.00)

Setting Clockratepr to Lognormal(-6.00,1.00)

Setting Clockratepr to Lognormal(-6.00,1.00)

Setting Clockratepr to Lognormal(-6.00,1.00)

Setting Clockratepr to Lognormal(-6.00,1.00)

Successfully set prior model parameters to all

applicable data partitions

WARNING: There are 61 characters incompatible with the specified

coding bias. These characters will be excluded.

WARNING: There are 10 characters incompatible with the specified

coding bias. These characters will be excluded.

WARNING: There are 5 characters incompatible with the specified

coding bias. These characters will be excluded.

Setting Clockvarpr to ILN for partition 1

Setting Clockvarpr to ILN for partition 2

Setting Clockvarpr to ILN for partition 3

Setting Clockvarpr to ILN for partition 4

Setting Clockvarpr to ILN for partition 5

Successfully set prior model parameters to all

applicable data partitions

WARNING: There are 61 characters incompatible with the specified

coding bias. These characters will be excluded.

WARNING: There are 10 characters incompatible with the specified

coding bias. These characters will be excluded.

WARNING: There are 5 characters incompatible with the specified

coding bias. These characters will be excluded.

Unlinking

WARNING: There are 61 characters incompatible with the specified

coding bias. These characters will be excluded.

WARNING: There are 10 characters incompatible with the specified

coding bias. These characters will be excluded.

WARNING: There are 5 characters incompatible with the specified

coding bias. These characters will be excluded.

Setting age of taxon 'Euconodonta' to Fixed(535.50)

Setting age of taxon 'Jamoytius' to Fixed(435.40)

Setting age of taxon 'Euphanerops' to Fixed(370.00)

Setting age of taxon 'Achanarella' to Fixed(385.00)

Setting age of taxon 'Ciderius' to Fixed(432.00)

Setting age of taxon 'Cornovichthys' to Fixed(385.00)

Setting age of taxon 'Lasanius' to Fixed(428.20)

Setting age of taxon 'Birkenia' to Fixed(435.40)

Setting age of taxon 'Rhyncholepis' to Fixed(431.95)

Setting age of taxon 'Myxinikela' to Fixed(310.00)

Setting age of taxon 'Tethymyxine' to Fixed(95.00)

Setting age of taxon 'Myxineidus' to Fixed(310.00)

Setting age of taxon 'Gilpichthys' to Fixed(310.00)

Setting age of taxon 'Mesomyzon' to Fixed(125.00)

Setting age of taxon 'Yanliaomyzon_occisor' to Fixed(158.00)

Setting age of taxon 'Yanliaomyzon_igensdentes' to Fixed(163.00)

Setting age of taxon 'Priscomyzon' to Fixed(360.00)

Setting age of taxon 'Mayomyzon' to Fixed(310.00)

Setting age of taxon 'Hardistiella' to Fixed(320.00)

Setting age of taxon 'Pipiscius' to Fixed(310.00)

Setting Nodeagepr to Calibrated for partition 1

Setting Nodeagepr to Calibrated for partition 2

Setting Nodeagepr to Calibrated for partition 3

Setting Nodeagepr to Calibrated for partition 4

Setting Nodeagepr to Calibrated for partition 5

Successfully set prior model parameters to all

applicable data partitions

WARNING: There are 61 characters incompatible with the specified

coding bias. These characters will be excluded.

WARNING: There are 10 characters incompatible with the specified

coding bias. These characters will be excluded.

WARNING: There are 5 characters incompatible with the specified

coding bias. These characters will be excluded.

Setting Brlenspr to Clock:Fossilization for partition 1

Setting Brlenspr to Clock:Fossilization for partition 2

Setting Brlenspr to Clock:Fossilization for partition 3

Setting Brlenspr to Clock:Fossilization for partition 4

Setting Brlenspr to Clock:Fossilization for partition 5

Successfully set prior model parameters to all

applicable data partitions

WARNING: There are 61 characters incompatible with the specified

coding bias. These characters will be excluded.

WARNING: There are 10 characters incompatible with the specified

coding bias. These characters will be excluded.

WARNING: There are 5 characters incompatible with the specified

coding bias. These characters will be excluded.

Setting SampleStrat to Random for partition 1

Setting SampleStrat to Random for partition 2

Setting SampleStrat to Random for partition 3

Setting SampleStrat to Random for partition 4

Setting SampleStrat to Random for partition 5

Successfully set prior model parameters to all

applicable data partitions

WARNING: There are 61 characters incompatible with the specified

coding bias. These characters will be excluded.

WARNING: There are 10 characters incompatible with the specified

coding bias. These characters will be excluded.

WARNING: There are 5 characters incompatible with the specified

coding bias. These characters will be excluded.

Setting Sampleprob to 0.30000000 for partition 1

Setting Sampleprob to 0.30000000 for partition 2

Setting Sampleprob to 0.30000000 for partition 3

Setting Sampleprob to 0.30000000 for partition 4

Setting Sampleprob to 0.30000000 for partition 5

Successfully set prior model parameters to all

applicable data partitions

WARNING: There are 61 characters incompatible with the specified

coding bias. These characters will be excluded.

WARNING: There are 10 characters incompatible with the specified

coding bias. These characters will be excluded.

WARNING: There are 5 characters incompatible with the specified

coding bias. These characters will be excluded.

Setting Speciationpr to Exponential(100.00) for partition 1

Setting Speciationpr to Exponential(100.00) for partition 2

Setting Speciationpr to Exponential(100.00) for partition 3

Setting Speciationpr to Exponential(100.00) for partition 4

Setting Speciationpr to Exponential(100.00) for partition 5

Successfully set prior model parameters to all

applicable data partitions

WARNING: There are 61 characters incompatible with the specified

coding bias. These characters will be excluded.

WARNING: There are 10 characters incompatible with the specified

coding bias. These characters will be excluded.

WARNING: There are 5 characters incompatible with the specified

coding bias. These characters will be excluded.

Setting Extinctionpr to Beta(2.00,1.00) for partition 1

Setting Extinctionpr to Beta(2.00,1.00) for partition 2

Setting Extinctionpr to Beta(2.00,1.00) for partition 3

Setting Extinctionpr to Beta(2.00,1.00) for partition 4

Setting Extinctionpr to Beta(2.00,1.00) for partition 5

Successfully set prior model parameters to all

applicable data partitions

WARNING: There are 61 characters incompatible with the specified

coding bias. These characters will be excluded.

WARNING: There are 10 characters incompatible with the specified

coding bias. These characters will be excluded.

WARNING: There are 5 characters incompatible with the specified

coding bias. These characters will be excluded.

Setting Fossilizationpr to Beta(1.00,9.00) for partition 1

Setting Fossilizationpr to Beta(1.00,9.00) for partition 2

Setting Fossilizationpr to Beta(1.00,9.00) for partition 3

Setting Fossilizationpr to Beta(1.00,9.00) for partition 4

Setting Fossilizationpr to Beta(1.00,9.00) for partition 5

Successfully set prior model parameters to all

applicable data partitions

WARNING: There are 61 characters incompatible with the specified

coding bias. These characters will be excluded.

WARNING: There are 10 characters incompatible with the specified

coding bias. These characters will be excluded.

WARNING: There are 5 characters incompatible with the specified

coding bias. These characters will be excluded.

Setting Treeagepr to Offsetexponential(500.00,600.00)

Setting Treeagepr to Offsetexponential(500.00,600.00)

Setting Treeagepr to Offsetexponential(500.00,600.00)

Setting Treeagepr to Offsetexponential(500.00,600.00)

Setting Treeagepr to Offsetexponential(500.00,600.00)

Successfully set prior model parameters to all

applicable data partitions

WARNING: There are 61 characters incompatible with the specified

coding bias. These characters will be excluded.

WARNING: There are 10 characters incompatible with the specified

coding bias. These characters will be excluded.

WARNING: There are 5 characters incompatible with the specified

coding bias. These characters will be excluded.

Setting Topologypr to Constraints for partition 1

Setting Topologypr to Constraints for partition 2

Setting Topologypr to Constraints for partition 3

Setting Topologypr to Constraints for partition 4

Setting Topologypr to Constraints for partition 5

Successfully set prior model parameters to all

applicable data partitions

WARNING: There are 61 characters incompatible with the specified

coding bias. These characters will be excluded.

WARNING: There are 10 characters incompatible with the specified

coding bias. These characters will be excluded.

WARNING: There are 5 characters incompatible with the specified

coding bias. These characters will be excluded.

Setting number of generations to 30000000

Setting sample frequency to 400

Setting print frequency to 10000

Setting diagnosing frequency to 50000

Successfully set chain parameters

Setting heating parameter to 0.070000

Setting chain output file names to "run.te.run<i>.<p/t>"

Successfully set chain parameters

Running Markov chain

MCMC stamp = 6291437938

Seed = 1816318358

Swapseed = 1654745601

Model settings:

Settings for partition 1 --

Datatype = Standard

Coding = Variable

# States = Variable, up to 24

State frequencies are fixed to be equal

Rates = Gamma

The distribution is approximated using 4 categories.

Shape parameter is exponentially

distributed with parameter (1.00).

Settings for partition 2 --

Datatype = Standard

Coding = Variable

# States = Variable, up to 24

State frequencies are fixed to be equal

Rates = Gamma

The distribution is approximated using 4 categories.

Shape parameter is exponentially

distributed with parameter (1.00).

Settings for partition 3 --

Datatype = Standard

Coding = Variable

# States = Variable, up to 24

State frequencies are fixed to be equal

Rates = Gamma

The distribution is approximated using 4 categories.

Shape parameter is exponentially

distributed with parameter (1.00).

Settings for partition 4 --

Datatype = DNA

Nucmodel = 4by4

Nst = 2

Transition and transversion rates, expressed

as proportions of the rate sum, have a

Beta(1.00,1.00) prior

Covarion = No

# States = 4

State frequencies have a Dirichlet prior

(1.00,1.00,1.00,1.00)

Rates = Gamma

The distribution is approximated using 4 categories.

Shape parameter is exponentially

distributed with parameter (1.00).

Settings for partition 5 --

Datatype = DNA

Nucmodel = 4by4

Nst = 2

Transition and transversion rates, expressed

as proportions of the rate sum, have a

Beta(1.00,1.00) prior

Covarion = No

# States = 4

State frequencies have a Dirichlet prior

(1.00,1.00,1.00,1.00)

Rates = Gamma

The distribution is approximated using 4 categories.

Shape parameter is exponentially

distributed with parameter (1.00).

Active parameters:

Partition(s)

Parameters 1 2 3 4 5

---------------------------------

Tratio . . . 1 2

Statefreq 3 4 5 6 7

Shape 8 8 8 9 10

Ratemultiplier 11 11 11 11 11

Topology 12 12 12 12 12

Brlens 13 13 13 13 13

Speciationrate 14 14 14 14 14

Extinctionrate 15 15 15 15 15

Fossilizationrate 16 16 16 16 16

ILNvar 17 18 19 20 20

ILNbranchrates 21 22 23 24 24

Clockrate 25 25 25 25 25

---------------------------------

Parameters can be linked or unlinked across partitions using 'link' and 'unlink'

1 -- Parameter = Tratio{4}

Type = Transition and transversion rates

Prior = Beta(1.00,1.00)

Partition = 4

2 -- Parameter = Tratio{5}

Type = Transition and transversion rates

Prior = Beta(1.00,1.00)

Partition = 5

3 -- Parameter = Alpha_symdir{1}

Type = Symmetric diricihlet/beta distribution alpha_i parameter

Prior = Symmetric dirichlet with all parameters fixed to infinity

Partition = 1

4 -- Parameter = Alpha_symdir{2}

Type = Symmetric diricihlet/beta distribution alpha_i parameter

Prior = Symmetric dirichlet with all parameters fixed to infinity

Partition = 2

5 -- Parameter = Alpha_symdir{3}

Type = Symmetric diricihlet/beta distribution alpha_i parameter

Prior = Symmetric dirichlet with all parameters fixed to infinity

Partition = 3

6 -- Parameter = Pi{4}

Type = Stationary state frequencies

Prior = Dirichlet

Partition = 4

7 -- Parameter = Pi{5}

Type = Stationary state frequencies

Prior = Dirichlet

Partition = 5

8 -- Parameter = Alpha{1,2,3}

Type = Shape of scaled gamma distribution of site rates

Prior = Exponential(1.00)

Partitions = 1, 2, and 3

9 -- Parameter = Alpha{4}

Type = Shape of scaled gamma distribution of site rates

Prior = Exponential(1.00)

Partition = 4

10 -- Parameter = Alpha{5}

Type = Shape of scaled gamma distribution of site rates

Prior = Exponential(1.00)

Partition = 5

11 -- Parameter = Ratemultiplier{all}

Type = Partition-specific rate multiplier

Prior = Dirichlet(1.00,1.00,1.00,1.00,1.00)

Partitions = All

12 -- Parameter = Tau{all}

Type = Topology

Prior = Prior on topology obeys the following constraints:

-- Hard constraint "ingroup"

Partitions = All

Subparam. = V{all}

13 -- Parameter = V{all}

Type = Branch lengths

Prior = Clock:Fossilization

Node depths are constrained by the following age constraints:

-- The age of terminal "Euconodonta" is Fixed(535.50)

-- The age of terminal "Jamoytius" is Fixed(435.40)

-- The age of terminal "Euphanerops" is Fixed(370.00)

-- The age of terminal "Achanarella" is Fixed(385.00)

-- The age of terminal "Ciderius" is Fixed(432.00)

-- The age of terminal "Cornovichthys" is Fixed(385.00)

-- The age of terminal "Lasanius" is Fixed(428.20)

-- The age of terminal "Birkenia" is Fixed(435.40)

-- The age of terminal "Rhyncholepis" is Fixed(431.95)

-- The age of terminal "Myxinikela" is Fixed(310.00)

-- The age of terminal "Tethymyxine" is Fixed(95.00)

-- The age of terminal "Myxineidus" is Fixed(310.00)

-- The age of terminal "Gilpichthys" is Fixed(310.00)

-- The age of terminal "Mesomyzon" is Fixed(125.00)

-- The age of terminal "Yanliaomyzon_igensdentes" is Fixed(163.00)

-- The age of terminal "Yanliaomyzon_occisor" is Fixed(158.00)

-- The age of terminal "Priscomyzon" is Fixed(360.00)

-- The age of terminal "Mayomyzon" is Fixed(310.00)

-- The age of terminal "Hardistiella" is Fixed(320.00)

-- The age of terminal "Pipiscius" is Fixed(310.00)

-- Tree age has a Offsetexponential(500.00,600.00) distribution

Partitions = All

Subparams = IlnBrlens{1}, IlnBrlens{2}, IlnBrlens{3} and IlnBrlens{4,5}

14 -- Parameter = Net_speciation{all}

Type = Speciation rate

Prior = Exponential(100.00)

Partitions = All

15 -- Parameter = Relative_extinction{all}

Type = Extinction rate

Prior = Beta(2.00,1.00)

Partitions = All

16 -- Parameter = Relative_fossilization{all}

Type = Fossilization rate

Prior = Beta(1.00,9.00)

Partitions = All

17 -- Parameter = ILNvar{1}

Type = Variance of ILN model branch rates

Prior = Exponential(1.00)

Partition = 1

Subparam. = IlnBrlens{1}

18 -- Parameter = ILNvar{2}

Type = Variance of ILN model branch rates

Prior = Exponential(1.00)

Partition = 2

Subparam. = IlnBrlens{2}

19 -- Parameter = ILNvar{3}

Type = Variance of ILN model branch rates

Prior = Exponential(1.00)

Partition = 3

Subparam. = IlnBrlens{3}

20 -- Parameter = ILNvar{4,5}

Type = Variance of ILN model branch rates

Prior = Exponential(1.00)

Partitions = 4 and 5

Subparam. = IlnBrlens{4,5}

21 -- Parameter = IlnBrlens{1}

Type = Branch lengths of ILN relaxed clock

Prior = LogNormal (expectation = 1.0, variance = ILNvar{1})

Partition = 1

22 -- Parameter = IlnBrlens{2}

Type = Branch lengths of ILN relaxed clock

Prior = LogNormal (expectation = 1.0, variance = ILNvar{2})

Partition = 2

23 -- Parameter = IlnBrlens{3}

Type = Branch lengths of ILN relaxed clock

Prior = LogNormal (expectation = 1.0, variance = ILNvar{3})

Partition = 3

24 -- Parameter = IlnBrlens{4,5}

Type = Branch lengths of ILN relaxed clock

Prior = LogNormal (expectation = 1.0, variance = ILNvar{4,5})

Partitions = 4 and 5

25 -- Parameter = Clockrate{all}

Type = Base rate of clock

Prior = Lognormal(-6.00,1.00)

The clock rate varies according to an independent lognormal model

Partitions = All

Number of chains per MPI processor = 1

The MCMC sampler will use the following moves:

With prob. Chain will use move

0.45 % Dirichlet(Tratio{4})

0.45 % Dirichlet(Tratio{5})

0.22 % Dirichlet(Pi{4})

0.22 % Slider(Pi{4})

0.22 % Dirichlet(Pi{5})

0.22 % Slider(Pi{5})

0.45 % Multiplier(Alpha{1,2,3})

0.45 % Multiplier(Alpha{4})

0.45 % Multiplier(Alpha{5})

0.34 % Dirichlet(Ratemultiplier{all})

0.34 % Slider(Ratemultiplier{all})

4.49 % ExtSPRClock(Tau{all},V{all})

8.99 % NNIClock(Tau{all},V{all})

4.49 % ParsSPRClock(Tau{all},V{all})

4.49 % AddBranch(V{all})

4.49 % DelBranch(V{all})

13.48 % NodesliderClock(V{all})

1.35 % TreeStretch(V{all})

1.35 % Multiplier(Net_speciation{all})

1.35 % Slider(Relative_extinction{all})

1.35 % Slider(Relative_fossilization{all})

0.90 % Multiplier(ILNvar{1})

0.90 % Multiplier(ILNvar{2})

0.90 % Multiplier(ILNvar{3})

0.90 % Multiplier(ILNvar{4,5})

11.24 % Multiplier(IlnBrlens{1})

11.24 % Multiplier(IlnBrlens{2})

11.24 % Multiplier(IlnBrlens{3})

11.24 % Multiplier(IlnBrlens{4,5})

1.80 % Multiplier(Clockrate{all})

Division 1 has 67 unique site patterns

Division 2 has 14 unique site patterns

Division 3 has 47 unique site patterns

Division 4 has 244 unique site patterns

Division 5 has 290 unique site patterns

Initializing conditional likelihoods

Using standard non-SSE likelihood calculator for division 1 (single-precision)

Using standard non-SSE likelihood calculator for division 2 (single-precision)

Using standard non-SSE likelihood calculator for division 3 (single-precision)

Using standard AVX likelihood calculator for division 4 (single-precision)

Using standard AVX likelihood calculator for division 5 (single-precision)

Initial log likelihoods and log prior probs for run 1:

Chain 1 -- -13011.842873 -- -9309.200117

There are 7 more chains on other processor(s)

Overwriting file "run.te.mcmc"

Overwriting file "run.te.run1.p"

Overwriting file "run.te.run1.t"

Overwriting file "run.te.run2.p"

Overwriting file "run.te.run2.t"

Using a relative burnin of 25.0 % for diagnostics

Chain results (30000000 generations requested):

0 -- [-13011.843] [...7 remote chains...]

10000 -- (-7682.346) [...7 remote chains...] -- 2:29:57

20000 -- (-7638.304) [...7 remote chains...] -- 2:29:54

30000 -- (-7623.934) [...7 remote chains...] -- 2:29:51

40000 -- (-7623.441) [...7 remote chains...] -- 2:29:48

50000 -- (-7615.233) [...7 remote chains...] -- 2:29:45

Average standard deviation of split frequencies: 0.079969

60000 -- (-7626.585) [...7 remote chains...] -- 2:29:42

70000 -- (-7624.625) [...7 remote chains...] -- 2:29:39

80000 -- (-7597.828) [...7 remote chains...] -- 2:29:36

90000 -- (-7607.496) [...7 remote chains...] -- 2:29:33

100000 -- (-7607.036) [...7 remote chains...] -- 2:29:30

Average standard deviation of split frequencies: 0.051715

110000 -- (-7593.247) [...7 remote chains...] -- 2:29:27

120000 -- (-7598.622) [...7 remote chains...] -- 2:29:24

130000 -- (-7606.982) [...7 remote chains...] -- 2:29:21

140000 -- (-7601.663) [...7 remote chains...] -- 2:29:18

150000 -- (-7607.740) [...7 remote chains...] -- 2:29:15

Average standard deviation of split frequencies: 0.053986

160000 -- (-7619.128) [...7 remote chains...] -- 2:29:12

170000 -- (-7588.377) [...7 remote chains...] -- 2:32:04

180000 -- (-7615.555) [...7 remote chains...] -- 2:29:06

190000 -- (-7598.637) [...7 remote chains...] -- 2:29:03

200000 -- (-7594.577) [...7 remote chains...] -- 2:31:29

Average standard deviation of split frequencies: 0.039421

210000 -- (-7593.987) [...7 remote chains...] -- 2:31:18

220000 -- (-7591.238) [...7 remote chains...] -- 2:31:09

230000 -- (-7606.585) [...7 remote chains...] -- 2:31:00

240000 -- (-7593.834) [...7 remote chains...] -- 2:30:52

250000 -- (-7596.497) [...7 remote chains...] -- 2:30:44

Average standard deviation of split frequencies: 0.045629

260000 -- (-7604.291) [...7 remote chains...] -- 2:30:36

270000 -- (-7584.434) [...7 remote chains...] -- 2:30:29

280000 -- (-7575.931) [...7 remote chains...] -- 2:30:22

290000 -- (-7599.795) [...7 remote chains...] -- 2:30:15

300000 -- (-7579.356) [...7 remote chains...] -- 2:30:09

Average standard deviation of split frequencies: 0.044689

310000 -- (-7585.729) [...7 remote chains...] -- 2:30:02

320000 -- (-7583.159) [...7 remote chains...] -- 2:29:56

330000 -- (-7592.774) [...7 remote chains...] -- 2:29:50

340000 -- (-7596.062) [...7 remote chains...] -- 2:29:45

350000 -- (-7586.496) [...7 remote chains...] -- 2:29:39

Average standard deviation of split frequencies: 0.040956

360000 -- (-7591.190) [...7 remote chains...] -- 2:29:34

370000 -- (-7587.641) [...7 remote chains...] -- 2:29:29

380000 -- (-7579.912) [...7 remote chains...] -- 2:29:23

390000 -- (-7587.083) [...7 remote chains...] -- 2:29:18

400000 -- (-7584.670) [...7 remote chains...] -- 2:29:14

Average standard deviation of split frequencies: 0.040156

410000 -- (-7572.795) [...7 remote chains...] -- 2:29:09

420000 -- (-7584.787) [...7 remote chains...] -- 2:29:04

430000 -- (-7573.922) [...7 remote chains...] -- 2:30:08

440000 -- (-7592.125) [...7 remote chains...] -- 2:30:02

450000 -- (-7597.964) [...7 remote chains...] -- 2:29:56

Average standard deviation of split frequencies: 0.037329

460000 -- (-7580.500) [...7 remote chains...] -- 2:29:50

470000 -- (-7584.371) [...7 remote chains...] -- 2:29:44

480000 -- (-7594.150) [...7 remote chains...] -- 2:29:39

490000 -- (-7589.335) [...7 remote chains...] -- 2:29:33

500000 -- (-7583.961) [...7 remote chains...] -- 2:29:28

Average standard deviation of split frequencies: 0.033278

510000 -- (-7576.738) [...7 remote chains...] -- 2:29:22

520000 -- (-7598.278) [...7 remote chains...] -- 2:29:17

530000 -- (-7593.268) [...7 remote chains...] -- 2:29:12

540000 -- (-7594.579) [...7 remote chains...] -- 2:29:07

550000 -- (-7578.447) [...7 remote chains...] -- 2:29:55

Average standard deviation of split frequencies: 0.030074

560000 -- (-7565.072) [...7 remote chains...] -- 2:29:49

570000 -- (-7577.534) [...7 remote chains...] -- 2:29:43

580000 -- (-7568.902) [...7 remote chains...] -- 2:29:38

590000 -- (-7557.450) [...7 remote chains...] -- 2:29:32

600000 -- (-7577.858) [...7 remote chains...] -- 2:29:27

Average standard deviation of split frequencies: 0.029362

610000 -- (-7581.121) [...7 remote chains...] -- 2:29:21

620000 -- (-7568.089) [...7 remote chains...] -- 2:29:16

630000 -- (-7584.466) [...7 remote chains...] -- 2:29:10

640000 -- (-7596.782) [...7 remote chains...] -- 2:29:05

650000 -- (-7574.356) [...7 remote chains...] -- 2:29:00

Average standard deviation of split frequencies: 0.029616

660000 -- (-7575.071) [...7 remote chains...] -- 2:28:55

670000 -- (-7574.136) [...7 remote chains...] -- 2:29:34

680000 -- (-7572.287) [...7 remote chains...] -- 2:29:28

690000 -- (-7580.073) [...7 remote chains...] -- 2:29:22

700000 -- (-7572.081) [...7 remote chains...] -- 2:29:17

Average standard deviation of split frequencies: 0.030042

710000 -- (-7570.861) [...7 remote chains...] -- 2:29:12

720000 -- (-7586.453) [...7 remote chains...] -- 2:29:06

730000 -- (-7579.258) [...7 remote chains...] -- 2:29:01

740000 -- (-7576.904) [...7 remote chains...] -- 2:28:56

750000 -- (-7581.948) [...7 remote chains...] -- 2:28:51

Average standard deviation of split frequencies: 0.030637

760000 -- (-7597.500) [...7 remote chains...] -- 2:28:45

770000 -- (-7580.356) [...7 remote chains...] -- 2:28:40

780000 -- (-7565.366) [...7 remote chains...] -- 2:28:35

790000 -- (-7569.265) [...7 remote chains...] -- 2:28:30

800000 -- (-7576.538) [...7 remote chains...] -- 2:29:02

Average standard deviation of split frequencies: 0.030885

810000 -- (-7576.079) [...7 remote chains...] -- 2:28:57

820000 -- (-7571.484) [...7 remote chains...] -- 2:28:51

830000 -- (-7570.255) [...7 remote chains...] -- 2:28:46

840000 -- (-7588.459) [...7 remote chains...] -- 2:28:41

850000 -- (-7557.271) [...7 remote chains...] -- 2:28:36

Average standard deviation of split frequencies: 0.028426

860000 -- (-7570.284) [...7 remote chains...] -- 2:28:31

870000 -- (-7568.598) [...7 remote chains...] -- 2:28:26

880000 -- (-7567.108) [...7 remote chains...] -- 2:28:21

890000 -- (-7561.476) [...7 remote chains...] -- 2:28:16

900000 -- (-7578.133) [...7 remote chains...] -- 2:28:11

Average standard deviation of split frequencies: 0.027290

910000 -- (-7570.662) [...7 remote chains...] -- 2:28:06

920000 -- (-7586.541) [...7 remote chains...] -- 2:28:02

930000 -- (-7577.022) [...7 remote chains...] -- 2:28:28

940000 -- (-7575.260) [...7 remote chains...] -- 2:28:23

950000 -- (-7570.648) [...7 remote chains...] -- 2:28:18

Average standard deviation of split frequencies: 0.030025

960000 -- (-7587.606) [...7 remote chains...] -- 2:28:13

970000 -- (-7579.150) [...7 remote chains...] -- 2:28:08

980000 -- (-7581.586) [...7 remote chains...] -- 2:28:03

990000 -- (-7563.706) [...7 remote chains...] -- 2:27:58

1000000 -- (-7556.246) [...7 remote chains...] -- 2:27:54

Average standard deviation of split frequencies: 0.033624

1010000 -- (-7577.219) [...7 remote chains...] -- 2:27:49

1020000 -- (-7558.326) [...7 remote chains...] -- 2:27:44

1030000 -- (-7575.483) [...7 remote chains...] -- 2:28:07

1040000 -- (-7581.695) [...7 remote chains...] -- 2:28:02

1050000 -- (-7583.035) [...7 remote chains...] -- 2:27:58

Average standard deviation of split frequencies: 0.035240

1060000 -- (-7578.076) [...7 remote chains...] -- 2:27:53

1070000 -- (-7582.485) [...7 remote chains...] -- 2:27:48

1080000 -- (-7577.937) [...7 remote chains...] -- 2:27:43

1090000 -- (-7603.767) [...7 remote chains...] -- 2:27:38

1100000 -- (-7580.680) [...7 remote chains...] -- 2:27:33

Average standard deviation of split frequencies: 0.037356

1110000 -- (-7575.373) [...7 remote chains...] -- 2:27:29

1120000 -- (-7581.613) [...7 remote chains...] -- 2:27:24

1130000 -- (-7580.953) [...7 remote chains...] -- 2:27:45

1140000 -- (-7580.782) [...7 remote chains...] -- 2:27:40

1150000 -- (-7594.640) [...7 remote chains...] -- 2:27:35

Average standard deviation of split frequencies: 0.036653

1160000 -- (-7591.776) [...7 remote chains...] -- 2:27:30

1170000 -- (-7609.007) [...7 remote chains...] -- 2:27:26

1180000 -- (-7579.642) [...7 remote chains...] -- 2:27:21

1190000 -- (-7583.749) [...7 remote chains...] -- 2:27:16

1200000 -- (-7573.564) [...7 remote chains...] -- 2:27:12

Average standard deviation of split frequencies: 0.036414

1210000 -- (-7550.216) [...7 remote chains...] -- 2:27:31

1220000 -- (-7568.243) [...7 remote chains...] -- 2:27:26

1230000 -- (-7575.843) [...7 remote chains...] -- 2:27:21

1240000 -- (-7585.983) [...7 remote chains...] -- 2:27:16

1250000 -- (-7615.398) [...7 remote chains...] -- 2:27:12

Average standard deviation of split frequencies: 0.038713

1260000 -- (-7597.850) [...7 remote chains...] -- 2:27:07

1270000 -- (-7569.231) [...7 remote chains...] -- 2:27:02

1280000 -- (-7582.742) [...7 remote chains...] -- 2:26:57

1290000 -- (-7559.062) [...7 remote chains...] -- 2:27:15

1300000 -- (-7556.087) [...7 remote chains...] -- 2:27:10

Average standard deviation of split frequencies: 0.039591

1310000 -- (-7547.940) [...7 remote chains...] -- 2:27:06

1320000 -- (-7548.266) [...7 remote chains...] -- 2:27:01

1330000 -- (-7564.406) [...7 remote chains...] -- 2:26:56

1340000 -- (-7558.461) [...7 remote chains...] -- 2:26:51

1350000 -- (-7549.903) [...7 remote chains...] -- 2:26:47

Average standard deviation of split frequencies: 0.039184

1360000 -- (-7557.271) [...7 remote chains...] -- 2:26:42

1370000 -- (-7567.564) [...7 remote chains...] -- 2:26:37

1380000 -- (-7571.802) [...7 remote chains...] -- 2:26:33

1390000 -- (-7573.978) [...7 remote chains...] -- 2:26:49

1400000 -- (-7550.223) [...7 remote chains...] -- 2:26:44

Average standard deviation of split frequencies: 0.038637

1410000 -- (-7561.645) [...7 remote chains...] -- 2:26:40

1420000 -- (-7554.642) [...7 remote chains...] -- 2:26:35

1430000 -- (-7548.320) [...7 remote chains...] -- 2:26:30

1440000 -- (-7554.085) [...7 remote chains...] -- 2:26:26

1450000 -- (-7538.092) [...7 remote chains...] -- 2:26:21

Average standard deviation of split frequencies: 0.037597

1460000 -- (-7545.751) [...7 remote chains...] -- 2:26:17

1470000 -- (-7523.384) [...7 remote chains...] -- 2:26:12

1480000 -- (-7524.093) [...7 remote chains...] -- 2:26:27

1490000 -- (-7544.225) [...7 remote chains...] -- 2:26:22

1500000 -- (-7551.288) [...7 remote chains...] -- 2:26:18

Average standard deviation of split frequencies: 0.038030

1510000 -- (-7546.430) [...7 remote chains...] -- 2:26:13

1520000 -- (-7549.055) [...7 remote chains...] -- 2:26:08

1530000 -- (-7556.570) [...7 remote chains...] -- 2:26:04

1540000 -- (-7559.462) [...7 remote chains...] -- 2:25:59

1550000 -- (-7543.214) [...7 remote chains...] -- 2:26:13

Average standard deviation of split frequencies: 0.038277

1560000 -- (-7542.230) [...7 remote chains...] -- 2:26:09

1570000 -- (-7566.541) [...7 remote chains...] -- 2:26:04

1580000 -- (-7554.027) [...7 remote chains...] -- 2:25:59

1590000 -- (-7566.120) [...7 remote chains...] -- 2:25:55

1600000 -- (-7544.798) [...7 remote chains...] -- 2:25:50

Average standard deviation of split frequencies: 0.037951

1610000 -- (-7557.765) [...7 remote chains...] -- 2:25:46

1620000 -- (-7566.404) [...7 remote chains...] -- 2:25:59

1630000 -- (-7548.351) [...7 remote chains...] -- 2:25:54

1640000 -- (-7559.103) [...7 remote chains...] -- 2:25:50

1650000 -- (-7553.310) [...7 remote chains...] -- 2:25:45

Average standard deviation of split frequencies: 0.037978

1660000 -- (-7563.085) [...7 remote chains...] -- 2:25:41

1670000 -- (-7562.511) [...7 remote chains...] -- 2:25:36

1680000 -- (-7557.823) [...7 remote chains...] -- 2:25:32

1690000 -- (-7571.353) [...7 remote chains...] -- 2:25:44

1700000 -- (-7555.163) [...7 remote chains...] -- 2:25:39

Average standard deviation of split frequencies: 0.038629

1710000 -- (-7567.559) [...7 remote chains...] -- 2:25:35

1720000 -- (-7561.407) [...7 remote chains...] -- 2:25:30

1730000 -- (-7575.399) [...7 remote chains...] -- 2:25:26

1740000 -- (-7566.615) [...7 remote chains...] -- 2:25:21

1750000 -- (-7573.951) [...7 remote chains...] -- 2:25:17

Average standard deviation of split frequencies: 0.038105

1760000 -- (-7553.498) [...7 remote chains...] -- 2:25:12

1770000 -- (-7559.143) [...7 remote chains...] -- 2:25:24

1780000 -- [-7545.255] [...7 remote chains...] -- 2:25:19

1790000 -- (-7572.678) [...7 remote chains...] -- 2:25:15

1800000 -- (-7567.839) [...7 remote chains...] -- 2:25:10

Average standard deviation of split frequencies: 0.037890

1810000 -- (-7567.638) [...7 remote chains...] -- 2:25:06

1820000 -- (-7555.733) [...7 remote chains...] -- 2:25:01

1830000 -- [-7548.363] [...7 remote chains...] -- 2:24:57

1840000 -- [-7558.114] [...7 remote chains...] -- 2:25:08

1850000 -- [-7565.676] [...7 remote chains...] -- 2:25:03

Average standard deviation of split frequencies: 0.038823

1860000 -- [-7568.561] [...7 remote chains...] -- 2:24:59

1870000 -- [-7551.001] [...7 remote chains...] -- 2:24:54

1880000 -- [-7544.124] [...7 remote chains...] -- 2:24:50

1890000 -- [-7544.979] [...7 remote chains...] -- 2:24:45

1900000 -- [-7554.826] [...7 remote chains...] -- 2:24:56

Average standard deviation of split frequencies: 0.038204

1910000 -- [-7548.039] [...7 remote chains...] -- 2:24:51

1920000 -- (-7555.070) [...7 remote chains...] -- 2:24:47

1930000 -- [-7555.962] [...7 remote chains...] -- 2:24:42

1940000 -- (-7555.226) [...7 remote chains...] -- 2:24:38

1950000 -- (-7562.736) [...7 remote chains...] -- 2:24:33

Average standard deviation of split frequencies: 0.037662

1960000 -- (-7576.212) [...7 remote chains...] -- 2:24:29

1970000 -- (-7574.276) [...7 remote chains...] -- 2:24:39

1980000 -- (-7543.461) [...7 remote chains...] -- 2:24:34

1990000 -- (-7562.929) [...7 remote chains...] -- 2:24:30

2000000 -- (-7563.095) [...7 remote chains...] -- 2:24:26

Average standard deviation of split frequencies: 0.035726

2010000 -- (-7590.881) [...7 remote chains...] -- 2:24:21

2020000 -- (-7561.093) [...7 remote chains...] -- 2:24:17

2030000 -- (-7569.617) [...7 remote chains...] -- 2:24:12

2040000 -- (-7560.598) [...7 remote chains...] -- 2:24:08

2050000 -- (-7552.090) [...7 remote chains...] -- 2:24:17

Average standard deviation of split frequencies: 0.035096

2060000 -- (-7578.873) [...7 remote chains...] -- 2:24:13

2070000 -- (-7560.159) [...7 remote chains...] -- 2:24:08

2080000 -- (-7561.789) [...7 remote chains...] -- 2:24:04

2090000 -- (-7587.867) [...7 remote chains...] -- 2:24:00

2100000 -- (-7570.457) [...7 remote chains...] -- 2:23:55

Average standard deviation of split frequencies: 0.033412

2110000 -- (-7565.467) [...7 remote chains...] -- 2:23:51

2120000 -- (-7562.281) [...7 remote chains...] -- 2:23:47

2130000 -- (-7559.889) [...7 remote chains...] -- 2:23:55

2140000 -- (-7564.601) [...7 remote chains...] -- 2:23:51

2150000 -- (-7545.600) [...7 remote chains...] -- 2:23:47

Average standard deviation of split frequencies: 0.032405

2160000 -- (-7558.435) [...7 remote chains...] -- 2:23:42

2170000 -- (-7556.480) [...7 remote chains...] -- 2:23:38

2180000 -- (-7557.421) [...7 remote chains...] -- 2:23:33

2190000 -- (-7552.492) [...7 remote chains...] -- 2:23:42

2200000 -- (-7558.908) [...7 remote chains...] -- 2:23:38

Average standard deviation of split frequencies: 0.033459

2210000 -- (-7559.491) [...7 remote chains...] -- 2:23:33

2220000 -- (-7547.709) [...7 remote chains...] -- 2:23:29

2230000 -- (-7578.473) [...7 remote chains...] -- 2:23:24

2240000 -- (-7579.228) [...7 remote chains...] -- 2:23:20

2250000 -- (-7573.696) [...7 remote chains...] -- 2:23:16

Average standard deviation of split frequencies: 0.033270

2260000 -- (-7549.040) [...7 remote chains...] -- 2:23:24

2270000 -- (-7558.065) [...7 remote chains...] -- 2:23:19

2280000 -- [-7540.903] [...7 remote chains...] -- 2:23:15

2290000 -- [-7548.280] [...7 remote chains...] -- 2:23:11

2300000 -- [-7545.737] [...7 remote chains...] -- 2:23:07

Average standard deviation of split frequencies: 0.033292

2310000 -- [-7561.205] [...7 remote chains...] -- 2:23:02

2320000 -- [-7551.831] [...7 remote chains...] -- 2:22:58

2330000 -- [-7545.883] [...7 remote chains...] -- 2:23:06

2340000 -- (-7543.545) [...7 remote chains...] -- 2:23:01

2350000 -- (-7549.660) [...7 remote chains...] -- 2:22:57

Average standard deviation of split frequencies: 0.033162

2360000 -- (-7541.949) [...7 remote chains...] -- 2:22:53

2370000 -- (-7562.032) [...7 remote chains...] -- 2:22:48

2380000 -- (-7547.882) [...7 remote chains...] -- 2:22:44

2390000 -- (-7534.648) [...7 remote chains...] -- 2:22:40

2400000 -- (-7558.916) [...7 remote chains...] -- 2:22:47

Average standard deviation of split frequencies: 0.032365

2410000 -- (-7556.860) [...7 remote chains...] -- 2:22:43

2420000 -- (-7535.572) [...7 remote chains...] -- 2:22:38

2430000 -- (-7548.043) [...7 remote chains...] -- 2:22:34

2440000 -- (-7551.927) [...7 remote chains...] -- 2:22:30

2450000 -- (-7541.013) [...7 remote chains...] -- 2:22:26

Average standard deviation of split frequencies: 0.031733

2460000 -- (-7551.113) [...7 remote chains...] -- 2:22:21

2470000 -- (-7543.819) [...7 remote chains...] -- 2:22:28

2480000 -- [-7551.371] [...7 remote chains...] -- 2:22:24

2490000 -- (-7541.924) [...7 remote chains...] -- 2:22:20

2500000 -- (-7548.889) [...7 remote chains...] -- 2:22:16

Average standard deviation of split frequencies: 0.031853

2510000 -- (-7557.469) [...7 remote chains...] -- 2:22:11

2520000 -- (-7574.578) [...7 remote chains...] -- 2:22:07

2530000 -- (-7555.991) [...7 remote chains...] -- 2:22:03

2540000 -- (-7579.079) [...7 remote chains...] -- 2:21:59

2550000 -- (-7571.454) [...7 remote chains...] -- 2:22:05

Average standard deviation of split frequencies: 0.031465

2560000 -- (-7556.157) [...7 remote chains...] -- 2:22:01

2570000 -- (-7560.325) [...7 remote chains...] -- 2:21:57

2580000 -- (-7549.446) [...7 remote chains...] -- 2:21:52

2590000 -- (-7553.202) [...7 remote chains...] -- 2:21:48

2600000 -- (-7562.511) [...7 remote chains...] -- 2:21:44

Average standard deviation of split frequencies: 0.030033

2610000 -- (-7575.541) [...7 remote chains...] -- 2:21:40

2620000 -- (-7563.425) [...7 remote chains...] -- 2:21:36

2630000 -- (-7559.571) [...7 remote chains...] -- 2:21:42

2640000 -- (-7549.500) [...7 remote chains...] -- 2:21:38

2650000 -- (-7557.074) [...7 remote chains...] -- 2:21:33

Average standard deviation of split frequencies: 0.029947

2660000 -- (-7530.982) [...7 remote chains...] -- 2:21:29

2670000 -- (-7559.272) [...7 remote chains...] -- 2:21:25

2680000 -- (-7550.741) [...7 remote chains...] -- 2:21:21

2690000 -- (-7564.926) [...7 remote chains...] -- 2:21:17

2700000 -- (-7566.726) [...7 remote chains...] -- 2:21:13

Average standard deviation of split frequencies: 0.029550

2710000 -- (-7557.519) [...7 remote chains...] -- 2:21:19

2720000 -- (-7596.478) [...7 remote chains...] -- 2:21:14

2730000 -- (-7558.102) [...7 remote chains...] -- 2:21:10

2740000 -- (-7558.547) [...7 remote chains...] -- 2:21:06

2750000 -- (-7545.213) [...7 remote chains...] -- 2:21:02

Average standard deviation of split frequencies: 0.028691

2760000 -- (-7551.942) [...7 remote chains...] -- 2:20:58

2770000 -- (-7553.672) [...7 remote chains...] -- 2:20:54

2780000 -- (-7543.819) [...7 remote chains...] -- 2:20:49

2790000 -- (-7550.083) [...7 remote chains...] -- 2:20:45

2800000 -- [-7542.009] [...7 remote chains...] -- 2:20:51

Average standard deviation of split frequencies: 0.028044

2810000 -- [-7546.040] [...7 remote chains...] -- 2:20:47

2820000 -- (-7559.436) [...7 remote chains...] -- 2:20:43

2830000 -- (-7547.544) [...7 remote chains...] -- 2:20:39

2840000 -- (-7560.337) [...7 remote chains...] -- 2:20:34

2850000 -- (-7574.002) [...7 remote chains...] -- 2:20:30

Average standard deviation of split frequencies: 0.027933

2860000 -- (-7561.357) [...7 remote chains...] -- 2:20:26

2870000 -- (-7567.481) [...7 remote chains...] -- 2:20:32

2880000 -- (-7554.812) [...7 remote chains...] -- 2:20:27

2890000 -- (-7549.346) [...7 remote chains...] -- 2:20:23

2900000 -- (-7547.478) [...7 remote chains...] -- 2:20:19

Average standard deviation of split frequencies: 0.028467

2910000 -- (-7553.047) [...7 remote chains...] -- 2:20:15

2920000 -- (-7588.848) [...7 remote chains...] -- 2:20:11

2930000 -- (-7565.018) [...7 remote chains...] -- 2:20:07

2940000 -- (-7584.334) [...7 remote chains...] -- 2:20:12

2950000 -- (-7559.753) [...7 remote chains...] -- 2:20:08

Average standard deviation of split frequencies: 0.027919

2960000 -- (-7583.868) [...7 remote chains...] -- 2:20:04

2970000 -- [-7588.144] [...7 remote chains...] -- 2:20:00

2980000 -- (-7546.721) [...7 remote chains...] -- 2:19:56

2990000 -- (-7535.421) [...7 remote chains...] -- 2:19:52

3000000 -- (-7584.871) [...7 remote chains...] -- 2:19:48

Average standard deviation of split frequencies: 0.026922

3010000 -- (-7564.290) [...7 remote chains...] -- 2:19:52

3020000 -- (-7571.367) [...7 remote chains...] -- 2:19:48

3030000 -- (-7554.623) [...7 remote chains...] -- 2:19:44

3040000 -- (-7534.373) [...7 remote chains...] -- 2:19:40

3050000 -- (-7568.372) [...7 remote chains...] -- 2:19:36

Average standard deviation of split frequencies: 0.026674

3060000 -- (-7551.468) [...7 remote chains...] -- 2:19:32

3070000 -- (-7542.524) [...7 remote chains...] -- 2:19:28

3080000 -- (-7559.975) [...7 remote chains...] -- 2:19:33

3090000 -- (-7552.894) [...7 remote chains...] -- 2:19:29

3100000 -- (-7554.804) [...7 remote chains...] -- 2:19:25

Average standard deviation of split frequencies: 0.026845

3110000 -- (-7548.130) [...7 remote chains...] -- 2:19:20

3120000 -- (-7551.249) [...7 remote chains...] -- 2:19:16

3130000 -- (-7552.063) [...7 remote chains...] -- 2:19:12

3140000 -- [-7543.057] [...7 remote chains...] -- 2:19:08

3150000 -- (-7556.409) [...7 remote chains...] -- 2:19:13

Average standard deviation of split frequencies: 0.026228

3160000 -- [-7541.711] [...7 remote chains...] -- 2:19:09

3170000 -- (-7548.362) [...7 remote chains...] -- 2:19:05

3180000 -- (-7559.004) [...7 remote chains...] -- 2:19:01

3190000 -- [-7562.944] [...7 remote chains...] -- 2:18:57

3200000 -- [-7546.305] [...7 remote chains...] -- 2:18:53

Average standard deviation of split frequencies: 0.026255

3210000 -- (-7559.313) [...7 remote chains...] -- 2:18:49

3220000 -- [-7539.821] [...7 remote chains...] -- 2:18:53

3230000 -- [-7549.028] [...7 remote chains...] -- 2:18:49

3240000 -- [-7560.017] [...7 remote chains...] -- 2:18:45

3250000 -- [-7559.044] [...7 remote chains...] -- 2:18:41

Average standard deviation of split frequencies: 0.026307

3260000 -- [-7534.311] [...7 remote chains...] -- 2:18:37

3270000 -- [-7554.989] [...7 remote chains...] -- 2:18:33

3280000 -- (-7562.658) [...7 remote chains...] -- 2:18:29

3290000 -- [-7546.242] [...7 remote chains...] -- 2:18:25

3300000 -- [-7537.363] [...7 remote chains...] -- 2:18:21

Average standard deviation of split frequencies: 0.026316

3310000 -- [-7540.341] [...7 remote chains...] -- 2:18:25

3320000 -- [-7537.785] [...7 remote chains...] -- 2:18:21

3330000 -- [-7548.572] [...7 remote chains...] -- 2:18:17

3340000 -- [-7538.758] [...7 remote chains...] -- 2:18:13

3350000 -- (-7573.216) [...7 remote chains...] -- 2:18:09

Average standard deviation of split frequencies: 0.025612

3360000 -- [-7547.176] [...7 remote chains...] -- 2:18:05

3370000 -- [-7551.554] [...7 remote chains...] -- 2:18:01

3380000 -- [-7548.602] [...7 remote chains...] -- 2:17:57

3390000 -- (-7547.504) [...7 remote chains...] -- 2:18:01

3400000 -- [-7539.520] [...7 remote chains...] -- 2:17:57

Average standard deviation of split frequencies: 0.025361

3410000 -- [-7537.402] [...7 remote chains...] -- 2:17:53

3420000 -- [-7551.549] [...7 remote chains...] -- 2:17:49

3430000 -- [-7547.510] [...7 remote chains...] -- 2:17:45

3440000 -- [-7550.028] [...7 remote chains...] -- 2:17:41

3450000 -- (-7561.132) [...7 remote chains...] -- 2:17:37

Average standard deviation of split frequencies: 0.025511

3460000 -- [-7544.204] [...7 remote chains...] -- 2:17:33

3470000 -- [-7562.901] [...7 remote chains...] -- 2:17:37

3480000 -- [-7554.904] [...7 remote chains...] -- 2:17:33

3490000 -- (-7545.596) [...7 remote chains...] -- 2:17:29

3500000 -- (-7561.994) [...7 remote chains...] -- 2:17:25

Average standard deviation of split frequencies: 0.025311

3510000 -- (-7551.669) [...7 remote chains...] -- 2:17:21

3520000 -- (-7551.261) [...7 remote chains...] -- 2:17:17

3530000 -- (-7555.002) [...7 remote chains...] -- 2:17:13

3540000 -- [-7541.744] [...7 remote chains...] -- 2:17:16

3550000 -- (-7542.904) [...7 remote chains...] -- 2:17:13

Average standard deviation of split frequencies: 0.024559

3560000 -- [-7527.569] [...7 remote chains...] -- 2:17:09

3570000 -- (-7543.157) [...7 remote chains...] -- 2:17:05

3580000 -- (-7550.986) [...7 remote chains...] -- 2:17:01

3590000 -- (-7545.078) [...7 remote chains...] -- 2:16:57

3600000 -- (-7542.629) [...7 remote chains...] -- 2:16:53

Average standard deviation of split frequencies: 0.024268

3610000 -- (-7550.424) [...7 remote chains...] -- 2:16:49

3620000 -- [-7541.868] [...7 remote chains...] -- 2:16:52

3630000 -- (-7536.929) [...7 remote chains...] -- 2:16:48

3640000 -- (-7548.105) [...7 remote chains...] -- 2:16:44

3650000 -- (-7538.798) [...7 remote chains...] -- 2:16:40

Average standard deviation of split frequencies: 0.024359

3660000 -- [-7549.361] [...7 remote chains...] -- 2:16:37

3670000 -- [-7548.675] [...7 remote chains...] -- 2:16:33

3680000 -- [-7560.589] [...7 remote chains...] -- 2:16:29

3690000 -- [-7572.545] [...7 remote chains...] -- 2:16:25

3700000 -- [-7537.951] [...7 remote chains...] -- 2:16:28

Average standard deviation of split frequencies: 0.023962

3710000 -- [-7535.470] [...7 remote chains...] -- 2:16:24

3720000 -- [-7539.359] [...7 remote chains...] -- 2:16:20

3730000 -- [-7556.341] [...7 remote chains...] -- 2:16:16

3740000 -- [-7538.842] [...7 remote chains...] -- 2:16:12

3750000 -- [-7556.599] [...7 remote chains...] -- 2:16:08

Average standard deviation of split frequencies: 0.023791

3760000 -- (-7535.863) [...7 remote chains...] -- 2:16:05

3770000 -- (-7548.824) [...7 remote chains...] -- 2:16:08

3780000 -- [-7555.231] [...7 remote chains...] -- 2:16:04

3790000 -- [-7531.654] [...7 remote chains...] -- 2:16:00

3800000 -- (-7563.329) [...7 remote chains...] -- 2:15:56

Average standard deviation of split frequencies: 0.023196

3810000 -- (-7555.781) [...7 remote chains...] -- 2:15:52

3820000 -- (-7572.164) [...7 remote chains...] -- 2:15:48

3830000 -- [-7557.395] [...7 remote chains...] -- 2:15:44

3840000 -- [-7557.533] [...7 remote chains...] -- 2:15:47

3850000 -- [-7551.035] [...7 remote chains...] -- 2:15:43

Average standard deviation of split frequencies: 0.022233

3860000 -- (-7553.043) [...7 remote chains...] -- 2:15:39

3870000 -- [-7547.225] [...7 remote chains...] -- 2:15:36

3880000 -- [-7518.414] [...7 remote chains...] -- 2:15:32

3890000 -- [-7546.713] [...7 remote chains...] -- 2:15:28

3900000 -- [-7543.327] [...7 remote chains...] -- 2:15:24

Average standard deviation of split frequencies: 0.021382

3910000 -- (-7540.464) [...7 remote chains...] -- 2:15:20

3920000 -- (-7555.645) [...7 remote chains...] -- 2:15:23

3930000 -- (-7557.534) [...7 remote chains...] -- 2:15:19

3940000 -- (-7557.979) [...7 remote chains...] -- 2:15:15

3950000 -- [-7552.302] [...7 remote chains...] -- 2:15:11

Average standard deviation of split frequencies: 0.021358

3960000 -- [-7543.867] [...7 remote chains...] -- 2:15:07

3970000 -- (-7552.863) [...7 remote chains...] -- 2:15:04

3980000 -- (-7526.870) [...7 remote chains...] -- 2:15:00

3990000 -- [-7542.524] [...7 remote chains...] -- 2:14:56

4000000 -- [-7547.934] [...7 remote chains...] -- 2:14:52

Average standard deviation of split frequencies: 0.021620

4010000 -- (-7542.426) [...7 remote chains...] -- 2:14:55

4020000 -- [-7558.814] [...7 remote chains...] -- 2:14:51

4030000 -- [-7542.789] [...7 remote chains...] -- 2:14:47

4040000 -- [-7552.673] [...7 remote chains...] -- 2:14:43

4050000 -- [-7555.782] [...7 remote chains...] -- 2:14:39

Average standard deviation of split frequencies: 0.021373

4060000 -- [-7551.587] [...7 remote chains...] -- 2:14:35

4070000 -- [-7546.577] [...7 remote chains...] -- 2:14:32

4080000 -- [-7555.994] [...7 remote chains...] -- 2:14:28

4090000 -- [-7540.025] [...7 remote chains...] -- 2:14:24

4100000 -- [-7565.078] [...7 remote chains...] -- 2:14:26

Average standard deviation of split frequencies: 0.021214

4110000 -- [-7567.581] [...7 remote chains...] -- 2:14:23

4120000 -- (-7562.926) [...7 remote chains...] -- 2:14:19

4130000 -- [-7560.670] [...7 remote chains...] -- 2:14:15

4140000 -- [-7560.133] [...7 remote chains...] -- 2:14:11

4150000 -- [-7540.987] [...7 remote chains...] -- 2:14:07

Average standard deviation of split frequencies: 0.021923

4160000 -- [-7544.867] [...7 remote chains...] -- 2:14:03

4170000 -- (-7545.381) [...7 remote chains...] -- 2:14:00

4180000 -- (-7542.038) [...7 remote chains...] -- 2:14:02

4190000 -- (-7563.494) [...7 remote chains...] -- 2:13:58

4200000 -- (-7560.822) [...7 remote chains...] -- 2:13:54

Average standard deviation of split frequencies: 0.022200

4210000 -- (-7548.277) [...7 remote chains...] -- 2:13:51

4220000 -- (-7542.315) [...7 remote chains...] -- 2:13:47

4230000 -- (-7548.629) [...7 remote chains...] -- 2:13:43

4240000 -- (-7578.341) [...7 remote chains...] -- 2:13:39

4250000 -- (-7564.380) [...7 remote chains...] -- 2:13:41

Average standard deviation of split frequencies: 0.021916

4260000 -- (-7555.775) [...7 remote chains...] -- 2:13:38

4270000 -- (-7548.831) [...7 remote chains...] -- 2:13:34

4280000 -- (-7560.289) [...7 remote chains...] -- 2:13:30

4290000 -- (-7566.184) [...7 remote chains...] -- 2:13:26

4300000 -- (-7563.017) [...7 remote chains...] -- 2:13:22

Average standard deviation of split frequencies: 0.021217

4310000 -- (-7570.342) [...7 remote chains...] -- 2:13:19

4320000 -- (-7553.666) [...7 remote chains...] -- 2:13:15

4330000 -- (-7562.623) [...7 remote chains...] -- 2:13:17

4340000 -- (-7581.782) [...7 remote chains...] -- 2:13:13

4350000 -- (-7574.619) [...7 remote chains...] -- 2:13:09

Average standard deviation of split frequencies: 0.021691

4360000 -- (-7568.994) [...7 remote chains...] -- 2:13:06

4370000 -- (-7569.016) [...7 remote chains...] -- 2:13:02

4380000 -- (-7546.411) [...7 remote chains...] -- 2:12:58

4390000 -- (-7568.951) [...7 remote chains...] -- 2:12:54

4400000 -- (-7562.704) [...7 remote chains...] -- 2:12:50

Average standard deviation of split frequencies: 0.021606

4410000 -- (-7569.867) [...7 remote chains...] -- 2:12:52

4420000 -- (-7573.702) [...7 remote chains...] -- 2:12:49

4430000 -- (-7575.504) [...7 remote chains...] -- 2:12:45

4440000 -- (-7547.521) [...7 remote chains...] -- 2:12:41

4450000 -- (-7570.984) [...7 remote chains...] -- 2:12:37

Average standard deviation of split frequencies: 0.021517

4460000 -- (-7549.307) [...7 remote chains...] -- 2:12:34

4470000 -- [-7533.321] [...7 remote chains...] -- 2:12:30

4480000 -- (-7558.048) [...7 remote chains...] -- 2:12:26

4490000 -- (-7552.717) [...7 remote chains...] -- 2:12:22

4500000 -- (-7536.008) [...7 remote chains...] -- 2:12:24

Average standard deviation of split frequencies: 0.020927

4510000 -- (-7571.558) [...7 remote chains...] -- 2:12:20

4520000 -- (-7555.488) [...7 remote chains...] -- 2:12:17

4530000 -- (-7552.719) [...7 remote chains...] -- 2:12:13

4540000 -- (-7562.541) [...7 remote chains...] -- 2:12:09

4550000 -- (-7579.853) [...7 remote chains...] -- 2:12:05

Average standard deviation of split frequencies: 0.020304

4560000 -- (-7560.259) [...7 remote chains...] -- 2:12:02

4570000 -- (-7580.334) [...7 remote chains...] -- 2:11:58

4580000 -- (-7542.833) [...7 remote chains...] -- 2:12:00

4590000 -- (-7568.747) [...7 remote chains...] -- 2:11:56

4600000 -- (-7564.775) [...7 remote chains...] -- 2:11:52

Average standard deviation of split frequencies: 0.020234

4610000 -- [-7553.158] [...7 remote chains...] -- 2:11:48

4620000 -- (-7566.154) [...7 remote chains...] -- 2:11:45

4630000 -- [-7539.399] [...7 remote chains...] -- 2:11:41

4640000 -- (-7550.191) [...7 remote chains...] -- 2:11:37

4650000 -- (-7545.660) [...7 remote chains...] -- 2:11:33

Average standard deviation of split frequencies: 0.019637

4660000 -- [-7557.231] [...7 remote chains...] -- 2:11:35

4670000 -- [-7551.024] [...7 remote chains...] -- 2:11:31

4680000 -- [-7550.225] [...7 remote chains...] -- 2:11:28

4690000 -- [-7554.705] [...7 remote chains...] -- 2:11:24

4700000 -- [-7562.664] [...7 remote chains...] -- 2:11:20

Average standard deviation of split frequencies: 0.019260

4710000 -- (-7557.795) [...7 remote chains...] -- 2:11:16

4720000 -- [-7544.798] [...7 remote chains...] -- 2:11:13

4730000 -- (-7569.330) [...7 remote chains...] -- 2:11:14

4740000 -- [-7545.130] [...7 remote chains...] -- 2:11:11

4750000 -- [-7552.791] [...7 remote chains...] -- 2:11:07

Average standard deviation of split frequencies: 0.019115

4760000 -- (-7555.220) [...7 remote chains...] -- 2:11:03

4770000 -- [-7537.579] [...7 remote chains...] -- 2:10:59

4780000 -- (-7537.199) [...7 remote chains...] -- 2:10:56

4790000 -- (-7556.510) [...7 remote chains...] -- 2:10:52

4800000 -- (-7548.787) [...7 remote chains...] -- 2:10:54

Average standard deviation of split frequencies: 0.018408

4810000 -- (-7545.226) [...7 remote chains...] -- 2:10:50

4820000 -- (-7559.156) [...7 remote chains...] -- 2:10:46

4830000 -- (-7569.322) [...7 remote chains...] -- 2:10:42

4840000 -- (-7542.410) [...7 remote chains...] -- 2:10:39

4850000 -- (-7557.489) [...7 remote chains...] -- 2:10:35

Average standard deviation of split frequencies: 0.017606

4860000 -- (-7548.742) [...7 remote chains...] -- 2:10:36

4870000 -- (-7574.667) [...7 remote chains...] -- 2:10:33

4880000 -- [-7575.741] [...7 remote chains...] -- 2:10:29

4890000 -- (-7561.494) [...7 remote chains...] -- 2:10:25

4900000 -- [-7543.431] [...7 remote chains...] -- 2:10:21

Average standard deviation of split frequencies: 0.017958

4910000 -- (-7568.634) [...7 remote chains...] -- 2:10:18

4920000 -- (-7560.714) [...7 remote chains...] -- 2:10:14

4930000 -- (-7556.930) [...7 remote chains...] -- 2:10:10

4940000 -- (-7537.840) [...7 remote chains...] -- 2:10:12

4950000 -- (-7554.234) [...7 remote chains...] -- 2:10:08

Average standard deviation of split frequencies: 0.018049

4960000 -- (-7568.115) [...7 remote chains...] -- 2:10:04

4970000 -- (-7551.860) [...7 remote chains...] -- 2:10:01

4980000 -- (-7556.207) [...7 remote chains...] -- 2:09:57

4990000 -- (-7551.775) [...7 remote chains...] -- 2:09:53

5000000 -- (-7539.649) [...7 remote chains...] -- 2:09:50

Average standard deviation of split frequencies: 0.017635

5010000 -- (-7576.705) [...7 remote chains...] -- 2:09:51

5020000 -- (-7544.061) [...7 remote chains...] -- 2:09:47

5030000 -- (-7564.168) [...7 remote chains...] -- 2:09:43

5040000 -- (-7557.660) [...7 remote chains...] -- 2:09:40

5050000 -- (-7550.783) [...7 remote chains...] -- 2:09:36

Average standard deviation of split frequencies: 0.016712

5060000 -- (-7536.989) [...7 remote chains...] -- 2:09:32

5070000 -- (-7539.797) [...7 remote chains...] -- 2:09:29

5080000 -- (-7555.738) [...7 remote chains...] -- 2:09:25

5090000 -- (-7567.505) [...7 remote chains...] -- 2:09:21

5100000 -- (-7560.804) [...7 remote chains...] -- 2:09:22

Average standard deviation of split frequencies: 0.015536

5110000 -- (-7557.750) [...7 remote chains...] -- 2:09:19

5120000 -- (-7566.121) [...7 remote chains...] -- 2:09:15

5130000 -- (-7566.567) [...7 remote chains...] -- 2:09:11

5140000 -- (-7566.924) [...7 remote chains...] -- 2:09:08

5150000 -- (-7556.698) [...7 remote chains...] -- 2:09:04

Average standard deviation of split frequencies: 0.015413

5160000 -- (-7580.774) [...7 remote chains...] -- 2:09:00

5170000 -- (-7555.939) [...7 remote chains...] -- 2:08:57

5180000 -- (-7537.679) [...7 remote chains...] -- 2:08:58

5190000 -- (-7552.281) [...7 remote chains...] -- 2:08:54

5200000 -- (-7558.560) [...7 remote chains...] -- 2:08:50

Average standard deviation of split frequencies: 0.015604

5210000 -- (-7551.118) [...7 remote chains...] -- 2:08:47

5220000 -- (-7572.885) [...7 remote chains...] -- 2:08:43

5230000 -- (-7545.557) [...7 remote chains...] -- 2:08:39

5240000 -- (-7555.611) [...7 remote chains...] -- 2:08:36

5250000 -- (-7544.041) [...7 remote chains...] -- 2:08:32

Average standard deviation of split frequencies: 0.015372

5260000 -- (-7537.178) [...7 remote chains...] -- 2:08:33

5270000 -- (-7570.821) [...7 remote chains...] -- 2:08:29

5280000 -- (-7575.862) [...7 remote chains...] -- 2:08:26

5290000 -- (-7567.298) [...7 remote chains...] -- 2:08:22

5300000 -- (-7551.093) [...7 remote chains...] -- 2:08:18

Average standard deviation of split frequencies: 0.015375

5310000 -- (-7569.975) [...7 remote chains...] -- 2:08:15

5320000 -- (-7547.897) [...7 remote chains...] -- 2:08:11

5330000 -- (-7548.890) [...7 remote chains...] -- 2:08:07

5340000 -- (-7559.188) [...7 remote chains...] -- 2:08:08

5350000 -- (-7561.883) [...7 remote chains...] -- 2:08:05

Average standard deviation of split frequencies: 0.015192

5360000 -- (-7544.911) [...7 remote chains...] -- 2:08:01

5370000 -- (-7556.959) [...7 remote chains...] -- 2:07:57

5380000 -- (-7557.558) [...7 remote chains...] -- 2:07:54

5390000 -- (-7542.709) [...7 remote chains...] -- 2:07:50

5400000 -- (-7562.404) [...7 remote chains...] -- 2:07:47

Average standard deviation of split frequencies: 0.015168

5410000 -- (-7567.926) [...7 remote chains...] -- 2:07:43

5420000 -- (-7569.398) [...7 remote chains...] -- 2:07:44

5430000 -- (-7569.388) [...7 remote chains...] -- 2:07:40

5440000 -- (-7566.049) [...7 remote chains...] -- 2:07:36

5450000 -- (-7540.033) [...7 remote chains...] -- 2:07:33

Average standard deviation of split frequencies: 0.015525

5460000 -- (-7546.818) [...7 remote chains...] -- 2:07:29

5470000 -- (-7560.286) [...7 remote chains...] -- 2:07:26

5480000 -- (-7542.517) [...7 remote chains...] -- 2:07:22

5490000 -- (-7569.710) [...7 remote chains...] -- 2:07:18

5500000 -- (-7548.872) [...7 remote chains...] -- 2:07:19

Average standard deviation of split frequencies: 0.015747

5510000 -- (-7563.645) [...7 remote chains...] -- 2:07:15

5520000 -- (-7563.026) [...7 remote chains...] -- 2:07:12

5530000 -- (-7567.032) [...7 remote chains...] -- 2:07:08

5540000 -- (-7560.570) [...7 remote chains...] -- 2:07:04

5550000 -- (-7572.624) [...7 remote chains...] -- 2:07:01

Average standard deviation of split frequencies: 0.015662

5560000 -- (-7565.570) [...7 remote chains...] -- 2:06:57

5570000 -- (-7567.778) [...7 remote chains...] -- 2:06:54

5580000 -- (-7551.557) [...7 remote chains...] -- 2:06:50

5590000 -- (-7568.306) [...7 remote chains...] -- 2:06:51

5600000 -- (-7558.962) [...7 remote chains...] -- 2:06:47

Average standard deviation of split frequencies: 0.015757

5610000 -- (-7564.460) [...7 remote chains...] -- 2:06:43

5620000 -- (-7561.374) [...7 remote chains...] -- 2:06:40

5630000 -- (-7534.502) [...7 remote chains...] -- 2:06:36

5640000 -- (-7542.071) [...7 remote chains...] -- 2:06:33

5650000 -- (-7543.196) [...7 remote chains...] -- 2:06:29

Average standard deviation of split frequencies: 0.014865

5660000 -- (-7546.062) [...7 remote chains...] -- 2:06:25

5670000 -- (-7559.894) [...7 remote chains...] -- 2:06:26

5680000 -- (-7574.359) [...7 remote chains...] -- 2:06:22

5690000 -- (-7557.944) [...7 remote chains...] -- 2:06:19

5700000 -- (-7552.389) [...7 remote chains...] -- 2:06:15

Average standard deviation of split frequencies: 0.014064

5710000 -- (-7566.957) [...7 remote chains...] -- 2:06:12

5720000 -- (-7565.117) [...7 remote chains...] -- 2:06:08

5730000 -- (-7571.278) [...7 remote chains...] -- 2:06:04

5740000 -- (-7549.750) [...7 remote chains...] -- 2:06:01

5750000 -- (-7546.204) [...7 remote chains...] -- 2:05:57

Average standard deviation of split frequencies: 0.014029

5760000 -- (-7566.718) [...7 remote chains...] -- 2:05:53

5770000 -- (-7547.597) [...7 remote chains...] -- 2:05:54

5780000 -- (-7568.732) [...7 remote chains...] -- 2:05:50

5790000 -- (-7553.962) [...7 remote chains...] -- 2:05:47

5800000 -- (-7577.875) [...7 remote chains...] -- 2:05:43

Average standard deviation of split frequencies: 0.013851

5810000 -- (-7568.823) [...7 remote chains...] -- 2:05:40

5820000 -- (-7562.280) [...7 remote chains...] -- 2:05:36

5830000 -- (-7567.453) [...7 remote chains...] -- 2:05:32

5840000 -- (-7551.455) [...7 remote chains...] -- 2:05:29

5850000 -- (-7541.332) [...7 remote chains...] -- 2:05:25

Average standard deviation of split frequencies: 0.013797

5860000 -- (-7583.204) [...7 remote chains...] -- 2:05:22

5870000 -- (-7587.676) [...7 remote chains...] -- 2:05:22

5880000 -- (-7575.812) [...7 remote chains...] -- 2:05:19

5890000 -- (-7565.347) [...7 remote chains...] -- 2:05:15

5900000 -- (-7555.032) [...7 remote chains...] -- 2:05:11

Average standard deviation of split frequencies: 0.014300

5910000 -- (-7564.224) [...7 remote chains...] -- 2:05:08

5920000 -- (-7546.481) [...7 remote chains...] -- 2:05:04

5930000 -- (-7548.778) [...7 remote chains...] -- 2:05:01

5940000 -- (-7560.804) [...7 remote chains...] -- 2:04:57

5950000 -- (-7556.750) [...7 remote chains...] -- 2:04:53

Average standard deviation of split frequencies: 0.014059

5960000 -- (-7557.893) [...7 remote chains...] -- 2:04:54

5970000 -- (-7563.936) [...7 remote chains...] -- 2:04:50

5980000 -- (-7562.687) [...7 remote chains...] -- 2:04:47

5990000 -- (-7557.000) [...7 remote chains...] -- 2:04:43

6000000 -- (-7564.014) [...7 remote chains...] -- 2:04:40

Average standard deviation of split frequencies: 0.013504

6010000 -- (-7573.472) [...7 remote chains...] -- 2:04:36

6020000 -- (-7575.027) [...7 remote chains...] -- 2:04:32

6030000 -- (-7566.932) [...7 remote chains...] -- 2:04:29

6040000 -- (-7557.512) [...7 remote chains...] -- 2:04:29

6050000 -- (-7540.683) [...7 remote chains...] -- 2:04:26

Average standard deviation of split frequencies: 0.013086

6060000 -- (-7568.359) [...7 remote chains...] -- 2:04:22

6070000 -- (-7561.881) [...7 remote chains...] -- 2:04:18

6080000 -- (-7561.319) [...7 remote chains...] -- 2:04:15

6090000 -- (-7572.510) [...7 remote chains...] -- 2:04:11

6100000 -- (-7577.740) [...7 remote chains...] -- 2:04:08

Average standard deviation of split frequencies: 0.013186

6110000 -- (-7564.943) [...7 remote chains...] -- 2:04:04

6120000 -- (-7569.603) [...7 remote chains...] -- 2:04:01

6130000 -- (-7568.126) [...7 remote chains...] -- 2:03:57

6140000 -- (-7561.579) [...7 remote chains...] -- 2:03:57

6150000 -- (-7555.689) [...7 remote chains...] -- 2:03:54

Average standard deviation of split frequencies: 0.013462

6160000 -- (-7548.512) [...7 remote chains...] -- 2:03:50

6170000 -- (-7525.615) [...7 remote chains...] -- 2:03:47

6180000 -- (-7546.953) [...7 remote chains...] -- 2:03:43

6190000 -- (-7549.535) [...7 remote chains...] -- 2:03:39

6200000 -- (-7565.751) [...7 remote chains...] -- 2:03:36

Average standard deviation of split frequencies: 0.013622

6210000 -- (-7553.274) [...7 remote chains...] -- 2:03:36

6220000 -- (-7553.683) [...7 remote chains...] -- 2:03:33

6230000 -- (-7528.081) [...7 remote chains...] -- 2:03:29

6240000 -- (-7568.396) [...7 remote chains...] -- 2:03:25

6250000 -- (-7578.308) [...7 remote chains...] -- 2:03:22

Average standard deviation of split frequencies: 0.013667

6260000 -- (-7556.488) [...7 remote chains...] -- 2:03:18

6270000 -- (-7557.528) [...7 remote chains...] -- 2:03:15

6280000 -- (-7550.384) [...7 remote chains...] -- 2:03:11

6290000 -- (-7562.735) [...7 remote chains...] -- 2:03:08

6300000 -- (-7564.178) [...7 remote chains...] -- 2:03:08

Average standard deviation of split frequencies: 0.013451

6310000 -- (-7550.667) [...7 remote chains...] -- 2:03:04

6320000 -- (-7532.969) [...7 remote chains...] -- 2:03:01

6330000 -- (-7539.951) [...7 remote chains...] -- 2:02:57

6340000 -- (-7550.178) [...7 remote chains...] -- 2:02:54

6350000 -- (-7552.468) [...7 remote chains...] -- 2:02:50

Average standard deviation of split frequencies: 0.012724

6360000 -- (-7547.897) [...7 remote chains...] -- 2:02:47

6370000 -- (-7568.217) [...7 remote chains...] -- 2:02:43

6380000 -- (-7542.911) [...7 remote chains...] -- 2:02:43

6390000 -- (-7550.916) [...7 remote chains...] -- 2:02:40

6400000 -- (-7560.614) [...7 remote chains...] -- 2:02:36

Average standard deviation of split frequencies: 0.012454

6410000 -- (-7551.287) [...7 remote chains...] -- 2:02:33

6420000 -- (-7550.521) [...7 remote chains...] -- 2:02:29

6430000 -- (-7597.223) [...7 remote chains...] -- 2:02:25

6440000 -- (-7562.818) [...7 remote chains...] -- 2:02:22

6450000 -- (-7556.592) [...7 remote chains...] -- 2:02:18

Average standard deviation of split frequencies: 0.012263

6460000 -- (-7557.169) [...7 remote chains...] -- 2:02:15

6470000 -- (-7581.583) [...7 remote chains...] -- 2:02:11

6480000 -- (-7588.071) [...7 remote chains...] -- 2:02:08

6490000 -- (-7579.284) [...7 remote chains...] -- 2:02:04

6500000 -- (-7569.922) [...7 remote chains...] -- 2:02:01

Average standard deviation of split frequencies: 0.012054

6510000 -- (-7564.310) [...7 remote chains...] -- 2:02:01

6520000 -- (-7578.285) [...7 remote chains...] -- 2:01:57

6530000 -- (-7567.609) [...7 remote chains...] -- 2:01:54

6540000 -- (-7543.848) [...7 remote chains...] -- 2:01:50

6550000 -- (-7555.160) [...7 remote chains...] -- 2:01:47

Average standard deviation of split frequencies: 0.012076

6560000 -- (-7570.148) [...7 remote chains...] -- 2:01:43

6570000 -- (-7550.725) [...7 remote chains...] -- 2:01:40

6580000 -- (-7551.153) [...7 remote chains...] -- 2:01:36

6590000 -- (-7564.358) [...7 remote chains...] -- 2:01:32

6600000 -- (-7546.851) [...7 remote chains...] -- 2:01:29

Average standard deviation of split frequencies: 0.012068

6610000 -- (-7558.720) [...7 remote chains...] -- 2:01:25

6620000 -- (-7548.585) [...7 remote chains...] -- 2:01:25

6630000 -- (-7592.483) [...7 remote chains...] -- 2:01:22

6640000 -- (-7573.619) [...7 remote chains...] -- 2:01:18

6650000 -- (-7558.909) [...7 remote chains...] -- 2:01:15

Average standard deviation of split frequencies: 0.012136

6660000 -- (-7565.731) [...7 remote chains...] -- 2:01:11

6670000 -- (-7553.912) [...7 remote chains...] -- 2:01:08

6680000 -- (-7568.331) [...7 remote chains...] -- 2:01:04

6690000 -- (-7568.409) [...7 remote chains...] -- 2:01:01

6700000 -- (-7597.587) [...7 remote chains...] -- 2:00:57

Average standard deviation of split frequencies: 0.012120

6710000 -- (-7581.679) [...7 remote chains...] -- 2:00:57

6720000 -- (-7567.434) [...7 remote chains...] -- 2:00:54

6730000 -- (-7536.566) [...7 remote chains...] -- 2:00:50

6740000 -- (-7562.787) [...7 remote chains...] -- 2:00:47

6750000 -- (-7550.122) [...7 remote chains...] -- 2:00:43

Average standard deviation of split frequencies: 0.012232

6760000 -- (-7565.932) [...7 remote chains...] -- 2:00:40

6770000 -- (-7563.732) [...7 remote chains...] -- 2:00:36

6780000 -- (-7576.951) [...7 remote chains...] -- 2:00:33

6790000 -- (-7556.331) [...7 remote chains...] -- 2:00:29

6800000 -- (-7537.973) [...7 remote chains...] -- 2:00:29

Average standard deviation of split frequencies: 0.012256

6810000 -- (-7542.644) [...7 remote chains...] -- 2:00:26

6820000 -- (-7548.850) [...7 remote chains...] -- 2:00:22

6830000 -- (-7548.454) [...7 remote chains...] -- 2:00:18

6840000 -- (-7593.667) [...7 remote chains...] -- 2:00:15

6850000 -- (-7563.998) [...7 remote chains...] -- 2:00:11

Average standard deviation of split frequencies: 0.012210

6860000 -- (-7545.396) [...7 remote chains...] -- 2:00:08

6870000 -- (-7565.573) [...7 remote chains...] -- 2:00:04

6880000 -- (-7579.184) [...7 remote chains...] -- 2:00:01

6890000 -- (-7554.692) [...7 remote chains...] -- 1:59:57

6900000 -- (-7559.634) [...7 remote chains...] -- 1:59:54

Average standard deviation of split frequencies: 0.012187

6910000 -- (-7556.317) [...7 remote chains...] -- 1:59:54

6920000 -- (-7571.224) [...7 remote chains...] -- 1:59:50

6930000 -- (-7535.551) [...7 remote chains...] -- 1:59:47

6940000 -- (-7543.709) [...7 remote chains...] -- 1:59:43

6950000 -- (-7546.770) [...7 remote chains...] -- 1:59:40

Average standard deviation of split frequencies: 0.012399

6960000 -- (-7575.061) [...7 remote chains...] -- 1:59:36

6970000 -- (-7548.780) [...7 remote chains...] -- 1:59:33

6980000 -- (-7572.563) [...7 remote chains...] -- 1:59:29

6990000 -- (-7556.670) [...7 remote chains...] -- 1:59:29

7000000 -- (-7552.235) [...7 remote chains...] -- 1:59:26

Average standard deviation of split frequencies: 0.012384

7010000 -- (-7564.735) [...7 remote chains...] -- 1:59:22

7020000 -- (-7543.029) [...7 remote chains...] -- 1:59:19

7030000 -- (-7555.429) [...7 remote chains...] -- 1:59:15

7040000 -- (-7557.633) [...7 remote chains...] -- 1:59:12

7050000 -- (-7539.498) [...7 remote chains...] -- 1:59:08

Average standard deviation of split frequencies: 0.012342

7060000 -- (-7573.945) [...7 remote chains...] -- 1:59:05

7070000 -- (-7570.944) [...7 remote chains...] -- 1:59:01

7080000 -- (-7550.756) [...7 remote chains...] -- 1:59:01

7090000 -- (-7567.441) [...7 remote chains...] -- 1:58:57

7100000 -- (-7561.296) [...7 remote chains...] -- 1:58:54

Average standard deviation of split frequencies: 0.012275

7110000 -- (-7553.437) [...7 remote chains...] -- 1:58:50

7120000 -- (-7564.873) [...7 remote chains...] -- 1:58:47

7130000 -- (-7570.782) [...7 remote chains...] -- 1:58:44

7140000 -- (-7554.137) [...7 remote chains...] -- 1:58:40

7150000 -- (-7547.874) [...7 remote chains...] -- 1:58:37

Average standard deviation of split frequencies: 0.012234

7160000 -- (-7563.914) [...7 remote chains...] -- 1:58:36

7170000 -- (-7564.358) [...7 remote chains...] -- 1:58:33

7180000 -- (-7604.306) [...7 remote chains...] -- 1:58:29

7190000 -- (-7587.107) [...7 remote chains...] -- 1:58:26

7200000 -- (-7571.000) [...7 remote chains...] -- 1:58:22

Average standard deviation of split frequencies: 0.012269

7210000 -- (-7556.579) [...7 remote chains...] -- 1:58:19

7220000 -- (-7558.544) [...7 remote chains...] -- 1:58:15

7230000 -- (-7556.962) [...7 remote chains...] -- 1:58:12

7240000 -- (-7555.010) [...7 remote chains...] -- 1:58:12

7250000 -- (-7553.055) [...7 remote chains...] -- 1:58:08

Average standard deviation of split frequencies: 0.012802

7260000 -- (-7558.313) [...7 remote chains...] -- 1:58:05

7270000 -- (-7562.713) [...7 remote chains...] -- 1:58:01

7280000 -- (-7564.481) [...7 remote chains...] -- 1:57:58

7290000 -- (-7548.620) [...7 remote chains...] -- 1:57:54

7300000 -- (-7552.352) [...7 remote chains...] -- 1:57:51

Average standard deviation of split frequencies: 0.012910

7310000 -- (-7557.087) [...7 remote chains...] -- 1:57:50

7320000 -- (-7559.212) [...7 remote chains...] -- 1:57:47

7330000 -- (-7554.315) [...7 remote chains...] -- 1:57:43

7340000 -- (-7539.783) [...7 remote chains...] -- 1:57:40

7350000 -- (-7548.953) [...7 remote chains...] -- 1:57:36

Average standard deviation of split frequencies: 0.012944

7360000 -- (-7541.016) [...7 remote chains...] -- 1:57:36

7370000 -- (-7555.553) [...7 remote chains...] -- 1:57:33

7380000 -- (-7552.656) [...7 remote chains...] -- 1:57:29

7390000 -- (-7566.250) [...7 remote chains...] -- 1:57:26

7400000 -- (-7572.197) [...7 remote chains...] -- 1:57:22

Average standard deviation of split frequencies: 0.012765

7410000 -- (-7570.349) [...7 remote chains...] -- 1:57:19

7420000 -- (-7566.035) [...7 remote chains...] -- 1:57:15

7430000 -- (-7563.496) [...7 remote chains...] -- 1:57:15

7440000 -- (-7538.574) [...7 remote chains...] -- 1:57:11

7450000 -- (-7538.599) [...7 remote chains...] -- 1:57:08

Average standard deviation of split frequencies: 0.012682

7460000 -- (-7549.414) [...7 remote chains...] -- 1:57:04

7470000 -- (-7552.090) [...7 remote chains...] -- 1:57:01

7480000 -- (-7556.018) [...7 remote chains...] -- 1:56:57

7490000 -- (-7559.241) [...7 remote chains...] -- 1:56:54

7500000 -- (-7574.873) [...7 remote chains...] -- 1:56:51

Average standard deviation of split frequencies: 0.012987

7510000 -- (-7565.188) [...7 remote chains...] -- 1:56:47

7520000 -- (-7545.444) [...7 remote chains...] -- 1:56:44

7530000 -- (-7563.849) [...7 remote chains...] -- 1:56:40

7540000 -- (-7553.539) [...7 remote chains...] -- 1:56:40

7550000 -- (-7559.447) [...7 remote chains...] -- 1:56:36

Average standard deviation of split frequencies: 0.013068

7560000 -- (-7555.779) [...7 remote chains...] -- 1:56:33

7570000 -- (-7558.490) [...7 remote chains...] -- 1:56:29

7580000 -- (-7542.039) [...7 remote chains...] -- 1:56:26

7590000 -- (-7545.505) [...7 remote chains...] -- 1:56:22

7600000 -- (-7561.054) [...7 remote chains...] -- 1:56:19

Average standard deviation of split frequencies: 0.013215

7610000 -- (-7547.472) [...7 remote chains...] -- 1:56:15

7620000 -- (-7545.841) [...7 remote chains...] -- 1:56:12

7630000 -- (-7562.029) [...7 remote chains...] -- 1:56:09

7640000 -- (-7545.477) [...7 remote chains...] -- 1:56:05

7650000 -- (-7566.521) [...7 remote chains...] -- 1:56:05

Average standard deviation of split frequencies: 0.013177

7660000 -- (-7567.947) [...7 remote chains...] -- 1:56:01

7670000 -- (-7564.426) [...7 remote chains...] -- 1:55:55

7680000 -- (-7555.955) [...7 remote chains...] -- 1:55:54

7690000 -- (-7555.638) [...7 remote chains...] -- 1:55:51

7700000 -- (-7555.400) [...7 remote chains...] -- 1:55:47

Average standard deviation of split frequencies: 0.013293

7710000 -- (-7557.820) [...7 remote chains...] -- 1:55:44

7720000 -- (-7552.362) [...7 remote chains...] -- 1:55:40

7730000 -- (-7558.421) [...7 remote chains...] -- 1:55:37

7740000 -- (-7558.680) [...7 remote chains...] -- 1:55:33

7750000 -- (-7578.676) [...7 remote chains...] -- 1:55:30

Average standard deviation of split frequencies: 0.013436

7760000 -- (-7571.015) [...7 remote chains...] -- 1:55:27

7770000 -- (-7542.469) [...7 remote chains...] -- 1:55:23

7780000 -- (-7591.973) [...7 remote chains...] -- 1:55:20

7790000 -- (-7561.727) [...7 remote chains...] -- 1:55:16

7800000 -- (-7563.049) [...7 remote chains...] -- 1:55:13

Average standard deviation of split frequencies: 0.013644

7810000 -- (-7569.598) [...7 remote chains...] -- 1:55:12

7820000 -- (-7552.417) [...7 remote chains...] -- 1:55:09

7830000 -- (-7565.301) [...7 remote chains...] -- 1:55:05

7840000 -- (-7554.794) [...7 remote chains...] -- 1:55:02

7850000 -- (-7562.874) [...7 remote chains...] -- 1:54:58

Average standard deviation of split frequencies: 0.013626

7860000 -- (-7564.176) [...7 remote chains...] -- 1:54:55

7870000 -- (-7578.359) [...7 remote chains...] -- 1:54:52

7880000 -- (-7549.902) [...7 remote chains...] -- 1:54:48

7890000 -- (-7562.261) [...7 remote chains...] -- 1:54:45

7900000 -- (-7567.826) [...7 remote chains...] -- 1:54:41

Average standard deviation of split frequencies: 0.013664

7910000 -- (-7565.165) [...7 remote chains...] -- 1:54:41

7920000 -- (-7568.144) [...7 remote chains...] -- 1:54:37

7930000 -- (-7567.465) [...7 remote chains...] -- 1:54:34

7940000 -- (-7548.165) [...7 remote chains...] -- 1:54:30

7950000 -- (-7560.033) [...7 remote chains...] -- 1:54:27

Average standard deviation of split frequencies: 0.013674

7960000 -- (-7557.415) [...7 remote chains...] -- 1:54:23

7970000 -- (-7561.646) [...7 remote chains...] -- 1:54:20

7980000 -- (-7543.544) [...7 remote chains...] -- 1:54:17

7990000 -- (-7556.845) [...7 remote chains...] -- 1:54:13

8000000 -- (-7558.992) [...7 remote chains...] -- 1:54:10

Average standard deviation of split frequencies: 0.013408

8010000 -- (-7547.395) [...7 remote chains...] -- 1:54:06

8020000 -- (-7553.632) [...7 remote chains...] -- 1:54:03

8030000 -- (-7547.300) [...7 remote chains...] -- 1:53:59

8040000 -- (-7560.509) [...7 remote chains...] -- 1:53:59

8050000 -- (-7557.600) [...7 remote chains...] -- 1:53:55

Average standard deviation of split frequencies: 0.013090

8060000 -- (-7561.814) [...7 remote chains...] -- 1:53:52

8070000 -- (-7555.367) [...7 remote chains...] -- 1:53:49

8080000 -- (-7580.536) [...7 remote chains...] -- 1:53:45

8090000 -- (-7570.886) [...7 remote chains...] -- 1:53:42

8100000 -- (-7551.227) [...7 remote chains...] -- 1:53:38

Average standard deviation of split frequencies: 0.012753

8110000 -- (-7563.779) [...7 remote chains...] -- 1:53:35

8120000 -- (-7548.616) [...7 remote chains...] -- 1:53:31

8130000 -- (-7551.039) [...7 remote chains...] -- 1:53:31

8140000 -- (-7572.274) [...7 remote chains...] -- 1:53:27

8150000 -- (-7559.191) [...7 remote chains...] -- 1:53:24

Average standard deviation of split frequencies: 0.012703

8160000 -- (-7566.955) [...7 remote chains...] -- 1:53:20

8170000 -- (-7566.397) [...7 remote chains...] -- 1:53:17

8180000 -- (-7543.072) [...7 remote chains...] -- 1:53:14

8190000 -- (-7554.644) [...7 remote chains...] -- 1:53:10

8200000 -- (-7548.971) [...7 remote chains...] -- 1:53:07

Average standard deviation of split frequencies: 0.012879

8210000 -- (-7560.968) [...7 remote chains...] -- 1:53:03

8220000 -- (-7553.937) [...7 remote chains...] -- 1:53:00

8230000 -- (-7564.123) [...7 remote chains...] -- 1:52:59

8240000 -- (-7550.395) [...7 remote chains...] -- 1:52:56

8250000 -- (-7542.408) [...7 remote chains...] -- 1:52:52

Average standard deviation of split frequencies: 0.013044

8260000 -- (-7562.952) [...7 remote chains...] -- 1:52:49

8270000 -- (-7577.770) [...7 remote chains...] -- 1:52:45

8280000 -- (-7544.079) [...7 remote chains...] -- 1:52:42

8290000 -- (-7565.282) [...7 remote chains...] -- 1:52:39

8300000 -- (-7545.516) [...7 remote chains...] -- 1:52:35

Average standard deviation of split frequencies: 0.012989

8310000 -- (-7549.435) [...7 remote chains...] -- 1:52:32

8320000 -- (-7580.602) [...7 remote chains...] -- 1:52:28

8330000 -- (-7560.959) [...7 remote chains...] -- 1:52:25

8340000 -- (-7562.261) [...7 remote chains...] -- 1:52:24

8350000 -- (-7565.845) [...7 remote chains...] -- 1:52:21

Average standard deviation of split frequencies: 0.013054

8360000 -- (-7546.374) [...7 remote chains...] -- 1:52:17

8370000 -- (-7562.948) [...7 remote chains...] -- 1:52:14

8380000 -- (-7551.065) [...7 remote chains...] -- 1:52:11

8390000 -- (-7545.688) [...7 remote chains...] -- 1:52:07

8400000 -- (-7578.249) [...7 remote chains...] -- 1:52:04

Average standard deviation of split frequencies: 0.012882

8410000 -- (-7560.778) [...7 remote chains...] -- 1:52:00

8420000 -- (-7551.800) [...7 remote chains...] -- 1:51:57

8430000 -- (-7553.353) [...7 remote chains...] -- 1:51:54

8440000 -- (-7546.596) [...7 remote chains...] -- 1:51:53

8450000 -- (-7565.585) [...7 remote chains...] -- 1:51:49

Average standard deviation of split frequencies: 0.012750

8460000 -- (-7560.712) [...7 remote chains...] -- 1:51:46

8470000 -- (-7563.192) [...7 remote chains...] -- 1:51:43

8480000 -- (-7556.295) [...7 remote chains...] -- 1:51:39

8490000 -- (-7554.325) [...7 remote chains...] -- 1:51:36

8500000 -- (-7568.899) [...7 remote chains...] -- 1:51:32

Average standard deviation of split frequencies: 0.012893

8510000 -- (-7551.509) [...7 remote chains...] -- 1:51:29

8520000 -- (-7555.571) [...7 remote chains...] -- 1:51:26

8530000 -- [-7554.112] [...7 remote chains...] -- 1:51:22

8540000 -- (-7562.520) [...7 remote chains...] -- 1:51:19

8550000 -- (-7561.846) [...7 remote chains...] -- 1:51:18

Average standard deviation of split frequencies: 0.012701

8560000 -- (-7552.324) [...7 remote chains...] -- 1:51:14

8570000 -- (-7579.259) [...7 remote chains...] -- 1:51:11

8580000 -- (-7560.971) [...7 remote chains...] -- 1:51:08

8590000 -- (-7564.291) [...7 remote chains...] -- 1:51:04

8600000 -- (-7561.916) [...7 remote chains...] -- 1:51:01

Average standard deviation of split frequencies: 0.012598

8610000 -- (-7562.628) [...7 remote chains...] -- 1:50:57

8620000 -- (-7573.803) [...7 remote chains...] -- 1:50:54

8630000 -- (-7564.283) [...7 remote chains...] -- 1:50:51

8640000 -- (-7563.820) [...7 remote chains...] -- 1:50:47

8650000 -- (-7570.098) [...7 remote chains...] -- 1:50:44

Average standard deviation of split frequencies: 0.012220

8660000 -- (-7576.905) [...7 remote chains...] -- 1:50:43

8670000 -- (-7591.851) [...7 remote chains...] -- 1:50:40

8680000 -- (-7566.567) [...7 remote chains...] -- 1:50:36

8690000 -- (-7569.320) [...7 remote chains...] -- 1:50:33

8700000 -- (-7555.271) [...7 remote chains...] -- 1:50:29

Average standard deviation of split frequencies: 0.012062

8710000 -- (-7582.346) [...7 remote chains...] -- 1:50:26

8720000 -- (-7540.145) [...7 remote chains...] -- 1:50:23

8730000 -- (-7563.085) [...7 remote chains...] -- 1:50:19

8740000 -- (-7560.078) [...7 remote chains...] -- 1:50:16

8750000 -- (-7568.082) [...7 remote chains...] -- 1:50:12

Average standard deviation of split frequencies: 0.011956

8760000 -- (-7551.019) [...7 remote chains...] -- 1:50:12

8770000 -- (-7552.124) [...7 remote chains...] -- 1:50:08

8780000 -- [-7541.090] [...7 remote chains...] -- 1:50:05

8790000 -- (-7543.859) [...7 remote chains...] -- 1:50:01

8800000 -- [-7544.613] [...7 remote chains...] -- 1:49:58

Average standard deviation of split frequencies: 0.011768

8810000 -- [-7557.403] [...7 remote chains...] -- 1:49:55

8820000 -- [-7554.360] [...7 remote chains...] -- 1:49:51

8830000 -- [-7553.489] [...7 remote chains...] -- 1:49:48

8840000 -- [-7525.457] [...7 remote chains...] -- 1:49:47

8850000 -- [-7543.305] [...7 remote chains...] -- 1:49:43

Average standard deviation of split frequencies: 0.011700

8860000 -- [-7554.062] [...7 remote chains...] -- 1:49:40

8870000 -- [-7566.305] [...7 remote chains...] -- 1:49:37

8880000 -- (-7567.162) [...7 remote chains...] -- 1:49:33

8890000 -- [-7534.418] [...7 remote chains...] -- 1:49:30

8900000 -- [-7559.271] [...7 remote chains...] -- 1:49:27

Average standard deviation of split frequencies: 0.011795

8910000 -- [-7555.459] [...7 remote chains...] -- 1:49:23

8920000 -- (-7541.681) [...7 remote chains...] -- 1:49:20

8930000 -- [-7537.918] [...7 remote chains...] -- 1:49:19

8940000 -- [-7546.166] [...7 remote chains...] -- 1:49:15

8950000 -- (-7559.184) [...7 remote chains...] -- 1:49:12

Average standard deviation of split frequencies: 0.011721

8960000 -- [-7552.959] [...7 remote chains...] -- 1:49:09

8970000 -- (-7554.683) [...7 remote chains...] -- 1:49:05

8980000 -- (-7545.831) [...7 remote chains...] -- 1:49:02

8990000 -- (-7554.460) [...7 remote chains...] -- 1:48:59

9000000 -- (-7565.983) [...7 remote chains...] -- 1:48:55

Average standard deviation of split frequencies: 0.011752

9010000 -- (-7561.666) [...7 remote chains...] -- 1:48:52

9020000 -- [-7562.437] [...7 remote chains...] -- 1:48:48

9030000 -- (-7572.425) [...7 remote chains...] -- 1:48:45

9040000 -- (-7561.407) [...7 remote chains...] -- 1:48:42

9050000 -- (-7566.744) [...7 remote chains...] -- 1:48:38

Average standard deviation of split frequencies: 0.011544

9060000 -- (-7547.908) [...7 remote chains...] -- 1:48:37

9070000 -- (-7546.295) [...7 remote chains...] -- 1:48:34

9080000 -- (-7547.468) [...7 remote chains...] -- 1:48:31

9090000 -- (-7543.249) [...7 remote chains...] -- 1:48:27

9100000 -- (-7552.782) [...7 remote chains...] -- 1:48:24

Average standard deviation of split frequencies: 0.011667

9110000 -- [-7558.572] [...7 remote chains...] -- 1:48:20

9120000 -- [-7538.332] [...7 remote chains...] -- 1:48:17

9130000 -- (-7536.427) [...7 remote chains...] -- 1:48:14

9140000 -- [-7536.829] [...7 remote chains...] -- 1:48:10

9150000 -- (-7543.581) [...7 remote chains...] -- 1:48:07

Average standard deviation of split frequencies: 0.011720

9160000 -- (-7538.244) [...7 remote chains...] -- 1:48:04

9170000 -- (-7548.932) [...7 remote chains...] -- 1:48:00

9180000 -- (-7562.677) [...7 remote chains...] -- 1:47:57

9190000 -- (-7565.041) [...7 remote chains...] -- 1:47:56

9200000 -- (-7552.771) [...7 remote chains...] -- 1:47:52

Average standard deviation of split frequencies: 0.011719

9210000 -- (-7553.960) [...7 remote chains...] -- 1:47:49

9220000 -- (-7548.692) [...7 remote chains...] -- 1:47:46

9230000 -- (-7567.027) [...7 remote chains...] -- 1:47:42

9240000 -- (-7571.682) [...7 remote chains...] -- 1:47:39

9250000 -- (-7575.211) [...7 remote chains...] -- 1:47:36

Average standard deviation of split frequencies: 0.011826

9260000 -- (-7556.441) [...7 remote chains...] -- 1:47:32

9270000 -- (-7567.369) [...7 remote chains...] -- 1:47:29

9280000 -- (-7581.146) [...7 remote chains...] -- 1:47:25

9290000 -- (-7567.957) [...7 remote chains...] -- 1:47:24

9300000 -- (-7566.923) [...7 remote chains...] -- 1:47:21

Average standard deviation of split frequencies: 0.011847

9310000 -- (-7560.654) [...7 remote chains...] -- 1:47:18

9320000 -- (-7558.970) [...7 remote chains...] -- 1:47:14

9330000 -- (-7577.595) [...7 remote chains...] -- 1:47:11

9340000 -- (-7553.541) [...7 remote chains...] -- 1:47:08

9350000 -- [-7546.746] [...7 remote chains...] -- 1:47:04

Average standard deviation of split frequencies: 0.011953

9360000 -- (-7563.473) [...7 remote chains...] -- 1:47:03

9370000 -- (-7566.914) [...7 remote chains...] -- 1:47:00

9380000 -- (-7572.112) [...7 remote chains...] -- 1:46:56

9390000 -- (-7537.808) [...7 remote chains...] -- 1:46:53

9400000 -- (-7554.111) [...7 remote chains...] -- 1:46:50

Average standard deviation of split frequencies: 0.011999

9410000 -- (-7544.737) [...7 remote chains...] -- 1:46:46

9420000 -- (-7579.417) [...7 remote chains...] -- 1:46:43

9430000 -- (-7559.504) [...7 remote chains...] -- 1:46:40

9440000 -- (-7578.847) [...7 remote chains...] -- 1:46:38

9450000 -- (-7564.458) [...7 remote chains...] -- 1:46:35

Average standard deviation of split frequencies: 0.011843

9460000 -- (-7582.257) [...7 remote chains...] -- 1:46:32

9470000 -- (-7542.130) [...7 remote chains...] -- 1:46:28

9480000 -- (-7559.974) [...7 remote chains...] -- 1:46:25

9490000 -- (-7546.997) [...7 remote chains...] -- 1:46:22

9500000 -- (-7572.359) [...7 remote chains...] -- 1:46:18

Average standard deviation of split frequencies: 0.011803

9510000 -- (-7543.642) [...7 remote chains...] -- 1:46:15

9520000 -- (-7533.592) [...7 remote chains...] -- 1:46:12

9530000 -- [-7545.199] [...7 remote chains...] -- 1:46:08

9540000 -- (-7556.185) [...7 remote chains...] -- 1:46:07

9550000 -- [-7555.955] [...7 remote chains...] -- 1:46:04

Average standard deviation of split frequencies: 0.011850

9560000 -- [-7547.127] [...7 remote chains...] -- 1:46:00

9570000 -- [-7561.144] [...7 remote chains...] -- 1:45:57

9580000 -- [-7546.864] [...7 remote chains...] -- 1:45:54

9590000 -- [-7550.485] [...7 remote chains...] -- 1:45:50

9600000 -- (-7557.874) [...7 remote chains...] -- 1:45:47

Average standard deviation of split frequencies: 0.011973

9610000 -- (-7555.930) [...7 remote chains...] -- 1:45:44

9620000 -- (-7564.893) [...7 remote chains...] -- 1:45:40

9630000 -- (-7563.492) [...7 remote chains...] -- 1:45:37

9640000 -- (-7556.253) [...7 remote chains...] -- 1:45:36

9650000 -- (-7551.522) [...7 remote chains...] -- 1:45:32

Average standard deviation of split frequencies: 0.012049

9660000 -- (-7553.975) [...7 remote chains...] -- 1:45:29

9670000 -- (-7540.995) [...7 remote chains...] -- 1:45:26

9680000 -- [-7543.867] [...7 remote chains...] -- 1:45:22

9690000 -- [-7550.338] [...7 remote chains...] -- 1:45:19

9700000 -- [-7553.448] [...7 remote chains...] -- 1:45:16

Average standard deviation of split frequencies: 0.012041

9710000 -- (-7551.969) [...7 remote chains...] -- 1:45:12

9720000 -- [-7559.988] [...7 remote chains...] -- 1:45:09

9730000 -- [-7554.253] [...7 remote chains...] -- 1:45:05

9740000 -- [-7534.027] [...7 remote chains...] -- 1:45:04

9750000 -- (-7565.155) [...7 remote chains...] -- 1:45:01

Average standard deviation of split frequencies: 0.012018

9760000 -- (-7564.355) [...7 remote chains...] -- 1:44:58

9770000 -- (-7555.364) [...7 remote chains...] -- 1:44:54

9780000 -- (-7556.081) [...7 remote chains...] -- 1:44:51

9790000 -- (-7556.160) [...7 remote chains...] -- 1:44:48

9800000 -- (-7553.634) [...7 remote chains...] -- 1:44:44

Average standard deviation of split frequencies: 0.011986

9810000 -- [-7542.613] [...7 remote chains...] -- 1:44:41

9820000 -- (-7557.866) [...7 remote chains...] -- 1:44:37

9830000 -- (-7551.011) [...7 remote chains...] -- 1:44:34

9840000 -- (-7568.618) [...7 remote chains...] -- 1:44:31

9850000 -- (-7568.747) [...7 remote chains...] -- 1:44:27

Average standard deviation of split frequencies: 0.011891

9860000 -- (-7562.219) [...7 remote chains...] -- 1:44:24

9870000 -- (-7553.321) [...7 remote chains...] -- 1:44:23

9880000 -- (-7573.680) [...7 remote chains...] -- 1:44:20

9890000 -- (-7544.248) [...7 remote chains...] -- 1:44:16

9900000 -- (-7567.653) [...7 remote chains...] -- 1:44:13

Average standard deviation of split frequencies: 0.011834

9910000 -- (-7561.487) [...7 remote chains...] -- 1:44:09

9920000 -- (-7565.256) [...7 remote chains...] -- 1:44:06

9930000 -- (-7565.499) [...7 remote chains...] -- 1:44:03

9940000 -- (-7557.492) [...7 remote chains...] -- 1:43:59

9950000 -- (-7560.977) [...7 remote chains...] -- 1:43:56

Average standard deviation of split frequencies: 0.012042

9960000 -- (-7557.674) [...7 remote chains...] -- 1:43:53

9970000 -- (-7556.542) [...7 remote chains...] -- 1:43:49

9980000 -- (-7551.036) [...7 remote chains...] -- 1:43:46

9990000 -- (-7579.997) [...7 remote chains...] -- 1:43:45

10000000 -- (-7546.233) [...7 remote chains...] -- 1:43:42

Average standard deviation of split frequencies: 0.011912

10010000 -- (-7584.206) [...7 remote chains...] -- 1:43:38

10020000 -- (-7559.155) [...7 remote chains...] -- 1:43:35

10030000 -- (-7605.851) [...7 remote chains...] -- 1:43:32

10040000 -- (-7567.377) [...7 remote chains...] -- 1:43:28

10050000 -- (-7568.433) [...7 remote chains...] -- 1:43:25

Average standard deviation of split frequencies: 0.011654

10060000 -- (-7565.615) [...7 remote chains...] -- 1:43:22

10070000 -- (-7568.975) [...7 remote chains...] -- 1:43:18

10080000 -- (-7564.527) [...7 remote chains...] -- 1:43:15

10090000 -- (-7560.220) [...7 remote chains...] -- 1:43:12

10100000 -- (-7551.360) [...7 remote chains...] -- 1:43:08

Average standard deviation of split frequencies: 0.011641

10110000 -- (-7562.995) [...7 remote chains...] -- 1:43:05

10120000 -- (-7561.500) [...7 remote chains...] -- 1:43:02

10130000 -- (-7556.829) [...7 remote chains...] -- 1:43:00

10140000 -- (-7551.171) [...7 remote chains...] -- 1:42:57

10150000 -- (-7543.851) [...7 remote chains...] -- 1:42:54

Average standard deviation of split frequencies: 0.011802

10160000 -- (-7546.158) [...7 remote chains...] -- 1:42:50

10170000 -- [-7546.753] [...7 remote chains...] -- 1:42:47

10180000 -- (-7543.066) [...7 remote chains...] -- 1:42:44

10190000 -- (-7554.812) [...7 remote chains...] -- 1:42:40

10200000 -- (-7569.618) [...7 remote chains...] -- 1:42:37

Average standard deviation of split frequencies: 0.011669

10210000 -- (-7556.766) [...7 remote chains...] -- 1:42:34

10220000 -- (-7564.751) [...7 remote chains...] -- 1:42:30

10230000 -- (-7569.295) [...7 remote chains...] -- 1:42:27

10240000 -- (-7553.686) [...7 remote chains...] -- 1:42:24

10250000 -- (-7564.386) [...7 remote chains...] -- 1:42:20

Average standard deviation of split frequencies: 0.011450

10260000 -- (-7568.464) [...7 remote chains...] -- 1:42:17

10270000 -- (-7575.747) [...7 remote chains...] -- 1:42:14

10280000 -- (-7552.494) [...7 remote chains...] -- 1:42:10

10290000 -- (-7550.869) [...7 remote chains...] -- 1:42:07

10300000 -- (-7555.914) [...7 remote chains...] -- 1:42:06

Average standard deviation of split frequencies: 0.011253

10310000 -- (-7557.436) [...7 remote chains...] -- 1:42:02

10320000 -- (-7543.760) [...7 remote chains...] -- 1:41:59

10330000 -- (-7560.135) [...7 remote chains...] -- 1:41:56

10340000 -- (-7542.901) [...7 remote chains...] -- 1:41:52

10350000 -- (-7554.714) [...7 remote chains...] -- 1:41:49

Average standard deviation of split frequencies: 0.011410

10360000 -- (-7563.555) [...7 remote chains...] -- 1:41:46

10370000 -- (-7554.526) [...7 remote chains...] -- 1:41:42

10380000 -- (-7566.770) [...7 remote chains...] -- 1:41:41

10390000 -- (-7555.414) [...7 remote chains...] -- 1:41:38

10400000 -- (-7557.364) [...7 remote chains...] -- 1:41:34

Average standard deviation of split frequencies: 0.011334

10410000 -- (-7575.083) [...7 remote chains...] -- 1:41:31

10420000 -- (-7559.486) [...7 remote chains...] -- 1:41:28

10430000 -- (-7547.238) [...7 remote chains...] -- 1:41:24

10440000 -- (-7575.059) [...7 remote chains...] -- 1:41:21

10450000 -- (-7555.631) [...7 remote chains...] -- 1:41:18

Average standard deviation of split frequencies: 0.011630

10460000 -- (-7566.965) [...7 remote chains...] -- 1:41:14

10470000 -- (-7549.541) [...7 remote chains...] -- 1:41:11

10480000 -- (-7561.671) [...7 remote chains...] -- 1:41:08

10490000 -- (-7547.880) [...7 remote chains...] -- 1:41:05

10500000 -- (-7559.339) [...7 remote chains...] -- 1:41:01

Average standard deviation of split frequencies: 0.011665

10510000 -- (-7539.001) [...7 remote chains...] -- 1:40:58

10520000 -- (-7560.717) [...7 remote chains...] -- 1:40:56

10530000 -- (-7557.585) [...7 remote chains...] -- 1:40:53

10540000 -- (-7569.916) [...7 remote chains...] -- 1:40:50

10550000 -- (-7549.972) [...7 remote chains...] -- 1:40:47

Average standard deviation of split frequencies: 0.011471

10560000 -- (-7586.038) [...7 remote chains...] -- 1:40:43

10570000 -- (-7544.742) [...7 remote chains...] -- 1:40:40

10580000 -- (-7569.496) [...7 remote chains...] -- 1:40:37

10590000 -- (-7569.667) [...7 remote chains...] -- 1:40:33

10600000 -- (-7559.317) [...7 remote chains...] -- 1:40:30

Average standard deviation of split frequencies: 0.011270

10610000 -- (-7554.805) [...7 remote chains...] -- 1:40:27

10620000 -- (-7546.965) [...7 remote chains...] -- 1:40:23

10630000 -- (-7554.143) [...7 remote chains...] -- 1:40:20

10640000 -- (-7556.163) [...7 remote chains...] -- 1:40:17

10650000 -- (-7555.809) [...7 remote chains...] -- 1:40:13

Average standard deviation of split frequencies: 0.011185

10660000 -- (-7548.455) [...7 remote chains...] -- 1:40:10

10670000 -- (-7560.522) [...7 remote chains...] -- 1:40:07

10680000 -- (-7556.353) [...7 remote chains...] -- 1:40:04

10690000 -- (-7563.422) [...7 remote chains...] -- 1:40:00

10700000 -- (-7567.543) [...7 remote chains...] -- 1:39:59

Average standard deviation of split frequencies: 0.011048

10710000 -- (-7562.002) [...7 remote chains...] -- 1:39:55

10720000 -- (-7575.787) [...7 remote chains...] -- 1:39:52

10730000 -- (-7576.454) [...7 remote chains...] -- 1:39:49

10740000 -- (-7562.946) [...7 remote chains...] -- 1:39:46

10750000 -- (-7572.918) [...7 remote chains...] -- 1:39:42

Average standard deviation of split frequencies: 0.010880

10760000 -- (-7581.950) [...7 remote chains...] -- 1:39:39

10770000 -- (-7554.974) [...7 remote chains...] -- 1:39:36

10780000 -- (-7574.901) [...7 remote chains...] -- 1:39:32

10790000 -- (-7563.296) [...7 remote chains...] -- 1:39:29

10800000 -- (-7567.491) [...7 remote chains...] -- 1:39:26

Average standard deviation of split frequencies: 0.010863

10810000 -- (-7573.524) [...7 remote chains...] -- 1:39:22

10820000 -- (-7580.863) [...7 remote chains...] -- 1:39:19

10830000 -- (-7573.429) [...7 remote chains...] -- 1:39:16

10840000 -- (-7550.582) [...7 remote chains...] -- 1:39:13

10850000 -- (-7559.221) [...7 remote chains...] -- 1:39:09

Average standard deviation of split frequencies: 0.011030

10860000 -- (-7559.310) [...7 remote chains...] -- 1:39:06

10870000 -- (-7576.625) [...7 remote chains...] -- 1:39:03

10880000 -- (-7555.976) [...7 remote chains...] -- 1:38:59

10890000 -- (-7548.874) [...7 remote chains...] -- 1:38:56

10900000 -- (-7534.335) [...7 remote chains...] -- 1:38:55

Average standard deviation of split frequencies: 0.010970

10910000 -- (-7552.964) [...7 remote chains...] -- 1:38:51

10920000 -- (-7559.036) [...7 remote chains...] -- 1:38:48

10930000 -- (-7579.581) [...7 remote chains...] -- 1:38:45

10940000 -- (-7571.035) [...7 remote chains...] -- 1:38:41

10950000 -- (-7571.650) [...7 remote chains...] -- 1:38:38

Average standard deviation of split frequencies: 0.010709

10960000 -- (-7556.594) [...7 remote chains...] -- 1:38:35

10970000 -- (-7562.335) [...7 remote chains...] -- 1:38:31

10980000 -- (-7576.247) [...7 remote chains...] -- 1:38:28

10990000 -- (-7544.029) [...7 remote chains...] -- 1:38:25

11000000 -- [-7532.843] [...7 remote chains...] -- 1:38:22

Average standard deviation of split frequencies: 0.010415

11010000 -- [-7557.098] [...7 remote chains...] -- 1:38:20

11020000 -- [-7575.212] [...7 remote chains...] -- 1:38:17

11030000 -- [-7576.069] [...7 remote chains...] -- 1:38:13

11040000 -- [-7545.410] [...7 remote chains...] -- 1:38:10

11050000 -- (-7574.674) [...7 remote chains...] -- 1:38:07

Average standard deviation of split frequencies: 0.010303

11060000 -- (-7570.194) [...7 remote chains...] -- 1:38:04

11070000 -- (-7567.363) [...7 remote chains...] -- 1:38:00

11080000 -- (-7552.083) [...7 remote chains...] -- 1:37:57

11090000 -- (-7554.035) [...7 remote chains...] -- 1:37:54

11100000 -- (-7557.945) [...7 remote chains...] -- 1:37:50

Average standard deviation of split frequencies: 0.010350

11110000 -- (-7579.255) [...7 remote chains...] -- 1:37:47

11120000 -- (-7557.292) [...7 remote chains...] -- 1:37:44

11130000 -- (-7553.430) [...7 remote chains...] -- 1:37:41

11140000 -- (-7577.790) [...7 remote chains...] -- 1:37:37

11150000 -- (-7560.493) [...7 remote chains...] -- 1:37:34

Average standard deviation of split frequencies: 0.010446

11160000 -- (-7549.461) [...7 remote chains...] -- 1:37:32

11170000 -- (-7541.422) [...7 remote chains...] -- 1:37:29

11180000 -- (-7563.151) [...7 remote chains...] -- 1:37:26

11190000 -- (-7575.077) [...7 remote chains...] -- 1:37:23

11200000 -- (-7578.102) [...7 remote chains...] -- 1:37:19

Average standard deviation of split frequencies: 0.010200

11210000 -- (-7553.003) [...7 remote chains...] -- 1:37:16

11220000 -- (-7564.339) [...7 remote chains...] -- 1:37:13

11230000 -- [-7549.866] [...7 remote chains...] -- 1:37:09

11240000 -- [-7559.578] [...7 remote chains...] -- 1:37:06

11250000 -- [-7529.122] [...7 remote chains...] -- 1:37:03

Average standard deviation of split frequencies: 0.010046

11260000 -- [-7539.382] [...7 remote chains...] -- 1:37:00

11270000 -- [-7527.410] [...7 remote chains...] -- 1:36:56

11280000 -- (-7543.202) [...7 remote chains...] -- 1:36:53

11290000 -- (-7542.360) [...7 remote chains...] -- 1:36:50

11300000 -- (-7547.550) [...7 remote chains...] -- 1:36:46

Average standard deviation of split frequencies: 0.009988

11310000 -- (-7562.301) [...7 remote chains...] -- 1:36:43

11320000 -- (-7565.013) [...7 remote chains...] -- 1:36:40

11330000 -- (-7584.823) [...7 remote chains...] -- 1:36:37

11340000 -- (-7549.221) [...7 remote chains...] -- 1:36:33

11350000 -- (-7555.961) [...7 remote chains...] -- 1:36:30

Average standard deviation of split frequencies: 0.009953

11360000 -- (-7565.535) [...7 remote chains...] -- 1:36:27

11370000 -- [-7542.730] [...7 remote chains...] -- 1:36:23

11380000 -- [-7553.855] [...7 remote chains...] -- 1:36:20

11390000 -- (-7554.358) [...7 remote chains...] -- 1:36:17

11400000 -- (-7538.789) [...7 remote chains...] -- 1:36:14

Average standard deviation of split frequencies: 0.009561

11410000 -- (-7557.872) [...7 remote chains...] -- 1:36:12

11420000 -- (-7563.084) [...7 remote chains...] -- 1:36:07

11430000 -- (-7559.425) [...7 remote chains...] -- 1:36:05

11440000 -- (-7547.250) [...7 remote chains...] -- 1:36:02

11450000 -- (-7548.434) [...7 remote chains...] -- 1:35:59

Average standard deviation of split frequencies: 0.009614

11460000 -- (-7540.458) [...7 remote chains...] -- 1:35:56

11470000 -- (-7555.884) [...7 remote chains...] -- 1:35:52

11480000 -- (-7554.363) [...7 remote chains...] -- 1:35:49

11490000 -- (-7556.850) [...7 remote chains...] -- 1:35:46

11500000 -- (-7550.428) [...7 remote chains...] -- 1:35:43

Average standard deviation of split frequencies: 0.009582

11510000 -- (-7555.643) [...7 remote chains...] -- 1:35:39

11520000 -- (-7540.630) [...7 remote chains...] -- 1:35:36

11530000 -- (-7557.286) [...7 remote chains...] -- 1:35:33

11540000 -- (-7575.673) [...7 remote chains...] -- 1:35:29

11550000 -- (-7567.825) [...7 remote chains...] -- 1:35:26

Average standard deviation of split frequencies: 0.009409

11560000 -- (-7557.794) [...7 remote chains...] -- 1:35:23

11570000 -- (-7562.913) [...7 remote chains...] -- 1:35:20

11580000 -- (-7556.929) [...7 remote chains...] -- 1:35:16

11590000 -- (-7584.902) [...7 remote chains...] -- 1:35:13

11600000 -- (-7552.311) [...7 remote chains...] -- 1:35:10

Average standard deviation of split frequencies: 0.009318

11610000 -- (-7552.070) [...7 remote chains...] -- 1:35:07

11620000 -- (-7588.646) [...7 remote chains...] -- 1:35:05

11630000 -- (-7570.515) [...7 remote chains...] -- 1:35:02

11640000 -- (-7558.463) [...7 remote chains...] -- 1:34:58

11650000 -- (-7568.874) [...7 remote chains...] -- 1:34:55

Average standard deviation of split frequencies: 0.009626

11660000 -- (-7572.941) [...7 remote chains...] -- 1:34:52

11670000 -- (-7568.418) [...7 remote chains...] -- 1:34:49

11680000 -- (-7594.825) [...7 remote chains...] -- 1:34:45

11690000 -- (-7560.828) [...7 remote chains...] -- 1:34:42

11700000 -- (-7552.214) [...7 remote chains...] -- 1:34:39

Average standard deviation of split frequencies: 0.009535

11710000 -- (-7568.858) [...7 remote chains...] -- 1:34:35

11720000 -- (-7554.216) [...7 remote chains...] -- 1:34:32

11730000 -- (-7568.373) [...7 remote chains...] -- 1:34:29

11740000 -- (-7547.140) [...7 remote chains...] -- 1:34:26

11750000 -- (-7546.669) [...7 remote chains...] -- 1:34:22

Average standard deviation of split frequencies: 0.009502

11760000 -- (-7564.991) [...7 remote chains...] -- 1:34:19

11770000 -- (-7549.856) [...7 remote chains...] -- 1:34:16

11780000 -- (-7543.378) [...7 remote chains...] -- 1:34:13

11790000 -- (-7546.345) [...7 remote chains...] -- 1:34:11

11800000 -- (-7562.348) [...7 remote chains...] -- 1:34:08

Average standard deviation of split frequencies: 0.009408

11810000 -- (-7561.630) [...7 remote chains...] -- 1:34:04

11820000 -- (-7562.531) [...7 remote chains...] -- 1:34:01

11830000 -- (-7550.670) [...7 remote chains...] -- 1:33:58

11840000 -- (-7575.754) [...7 remote chains...] -- 1:33:55

11850000 -- (-7553.397) [...7 remote chains...] -- 1:33:51

Average standard deviation of split frequencies: 0.009399

11860000 -- (-7571.741) [...7 remote chains...] -- 1:33:48

11870000 -- (-7557.718) [...7 remote chains...] -- 1:33:45

11880000 -- (-7585.600) [...7 remote chains...] -- 1:33:42

11890000 -- (-7548.242) [...7 remote chains...] -- 1:33:38

11900000 -- (-7551.989) [...7 remote chains...] -- 1:33:35

Average standard deviation of split frequencies: 0.009348

11910000 -- (-7551.256) [...7 remote chains...] -- 1:33:32

11920000 -- (-7545.387) [...7 remote chains...] -- 1:33:29

11930000 -- (-7539.298) [...7 remote chains...] -- 1:33:25

11940000 -- (-7547.757) [...7 remote chains...] -- 1:33:22

11950000 -- (-7579.992) [...7 remote chains...] -- 1:33:19

Average standard deviation of split frequencies: 0.009248

11960000 -- (-7552.034) [...7 remote chains...] -- 1:33:17

11970000 -- (-7559.806) [...7 remote chains...] -- 1:33:14

11980000 -- (-7556.401) [...7 remote chains...] -- 1:33:11

11990000 -- (-7545.830) [...7 remote chains...] -- 1:33:07

12000000 -- (-7530.705) [...7 remote chains...] -- 1:33:04

Average standard deviation of split frequencies: 0.009392

12010000 -- (-7536.804) [...7 remote chains...] -- 1:33:01

12020000 -- (-7551.612) [...7 remote chains...] -- 1:32:57

12030000 -- (-7558.835) [...7 remote chains...] -- 1:32:54

12040000 -- (-7545.697) [...7 remote chains...] -- 1:32:51

12050000 -- (-7567.826) [...7 remote chains...] -- 1:32:48

Average standard deviation of split frequencies: 0.009552

12060000 -- (-7569.481) [...7 remote chains...] -- 1:32:44

12070000 -- (-7555.701) [...7 remote chains...] -- 1:32:41

12080000 -- (-7550.097) [...7 remote chains...] -- 1:32:38

12090000 -- (-7567.782) [...7 remote chains...] -- 1:32:35

12100000 -- (-7554.224) [...7 remote chains...] -- 1:32:33

Average standard deviation of split frequencies: 0.009621

12110000 -- (-7553.894) [...7 remote chains...] -- 1:32:30

12120000 -- [-7553.347] [...7 remote chains...] -- 1:32:26

12130000 -- [-7556.200] [...7 remote chains...] -- 1:32:23

12140000 -- (-7559.675) [...7 remote chains...] -- 1:32:20

12150000 -- [-7545.336] [...7 remote chains...] -- 1:32:17

Average standard deviation of split frequencies: 0.009598

12160000 -- (-7554.718) [...7 remote chains...] -- 1:32:13

12170000 -- (-7571.942) [...7 remote chains...] -- 1:32:10

12180000 -- (-7556.036) [...7 remote chains...] -- 1:32:07

12190000 -- (-7569.547) [...7 remote chains...] -- 1:32:04

12200000 -- (-7567.375) [...7 remote chains...] -- 1:32:00

Average standard deviation of split frequencies: 0.009789

12210000 -- (-7575.363) [...7 remote chains...] -- 1:31:57

12220000 -- (-7563.720) [...7 remote chains...] -- 1:31:54

12230000 -- (-7578.508) [...7 remote chains...] -- 1:31:51

12240000 -- (-7579.026) [...7 remote chains...] -- 1:31:47

12250000 -- (-7570.469) [...7 remote chains...] -- 1:31:44

Average standard deviation of split frequencies: 0.009952

12260000 -- (-7552.293) [...7 remote chains...] -- 1:31:41

12270000 -- (-7549.902) [...7 remote chains...] -- 1:31:38

12280000 -- (-7565.248) [...7 remote chains...] -- 1:31:34

12290000 -- (-7553.205) [...7 remote chains...] -- 1:31:31

12300000 -- (-7556.463) [...7 remote chains...] -- 1:31:28

Average standard deviation of split frequencies: 0.010149

12310000 -- (-7569.262) [...7 remote chains...] -- 1:31:25

12320000 -- (-7551.004) [...7 remote chains...] -- 1:31:21

12330000 -- (-7547.935) [...7 remote chains...] -- 1:31:18

12340000 -- (-7556.451) [...7 remote chains...] -- 1:31:15

12350000 -- (-7542.164) [...7 remote chains...] -- 1:31:12

Average standard deviation of split frequencies: 0.010131

12360000 -- (-7560.025) [...7 remote chains...] -- 1:31:10

12370000 -- (-7564.297) [...7 remote chains...] -- 1:31:07

12380000 -- (-7579.893) [...7 remote chains...] -- 1:31:03

12390000 -- (-7565.606) [...7 remote chains...] -- 1:31:00

12400000 -- (-7581.140) [...7 remote chains...] -- 1:30:57

Average standard deviation of split frequencies: 0.010559

12410000 -- (-7572.795) [...7 remote chains...] -- 1:30:54

12420000 -- (-7565.834) [...7 remote chains...] -- 1:30:50

12430000 -- (-7595.364) [...7 remote chains...] -- 1:30:47

12440000 -- (-7554.854) [...7 remote chains...] -- 1:30:44

12450000 -- (-7577.627) [...7 remote chains...] -- 1:30:41

Average standard deviation of split frequencies: 0.010421

12460000 -- (-7568.156) [...7 remote chains...] -- 1:30:37

12470000 -- (-7567.207) [...7 remote chains...] -- 1:30:34

12480000 -- (-7550.812) [...7 remote chains...] -- 1:30:32

12490000 -- (-7562.921) [...7 remote chains...] -- 1:30:29

12500000 -- (-7545.415) [...7 remote chains...] -- 1:30:26

Average standard deviation of split frequencies: 0.010180

12510000 -- (-7540.964) [...7 remote chains...] -- 1:30:23

12520000 -- (-7542.211) [...7 remote chains...] -- 1:30:19

12530000 -- (-7564.696) [...7 remote chains...] -- 1:30:16

12540000 -- (-7562.100) [...7 remote chains...] -- 1:30:13

12550000 -- (-7571.382) [...7 remote chains...] -- 1:30:10

Average standard deviation of split frequencies: 0.010125

12560000 -- (-7568.086) [...7 remote chains...] -- 1:30:06

12570000 -- (-7562.819) [...7 remote chains...] -- 1:30:03

12580000 -- (-7557.524) [...7 remote chains...] -- 1:30:00

12590000 -- (-7545.799) [...7 remote chains...] -- 1:29:57

12600000 -- (-7546.833) [...7 remote chains...] -- 1:29:54

Average standard deviation of split frequencies: 0.010140

12610000 -- (-7556.607) [...7 remote chains...] -- 1:29:50

12620000 -- (-7552.991) [...7 remote chains...] -- 1:29:47

12630000 -- (-7570.396) [...7 remote chains...] -- 1:29:44

12640000 -- (-7565.561) [...7 remote chains...] -- 1:29:41

12650000 -- (-7556.703) [...7 remote chains...] -- 1:29:37

Average standard deviation of split frequencies: 0.010186

12660000 -- (-7561.169) [...7 remote chains...] -- 1:29:34

12670000 -- (-7555.462) [...7 remote chains...] -- 1:29:32

12680000 -- (-7579.872) [...7 remote chains...] -- 1:29:29

12690000 -- (-7573.206) [...7 remote chains...] -- 1:29:26

12700000 -- (-7568.892) [...7 remote chains...] -- 1:29:23

Average standard deviation of split frequencies: 0.010055

12710000 -- (-7562.583) [...7 remote chains...] -- 1:29:19

12720000 -- (-7555.084) [...7 remote chains...] -- 1:29:16

12730000 -- (-7559.045) [...7 remote chains...] -- 1:29:13

12740000 -- (-7557.723) [...7 remote chains...] -- 1:29:10

12750000 -- (-7567.706) [...7 remote chains...] -- 1:29:06

Average standard deviation of split frequencies: 0.009950

12760000 -- (-7569.142) [...7 remote chains...] -- 1:29:03

12770000 -- (-7564.792) [...7 remote chains...] -- 1:29:00

12780000 -- (-7563.525) [...7 remote chains...] -- 1:28:57

12790000 -- (-7554.884) [...7 remote chains...] -- 1:28:55

12800000 -- (-7563.380) [...7 remote chains...] -- 1:28:52

Average standard deviation of split frequencies: 0.010153

12810000 -- (-7550.081) [...7 remote chains...] -- 1:28:48

12820000 -- (-7535.072) [...7 remote chains...] -- 1:28:45

12830000 -- (-7560.408) [...7 remote chains...] -- 1:28:42

12840000 -- (-7577.886) [...7 remote chains...] -- 1:28:39

12850000 -- (-7564.707) [...7 remote chains...] -- 1:28:35

Average standard deviation of split frequencies: 0.010356

12860000 -- (-7557.184) [...7 remote chains...] -- 1:28:32

12870000 -- (-7562.008) [...7 remote chains...] -- 1:28:29

12880000 -- (-7566.765) [...7 remote chains...] -- 1:28:26

12890000 -- (-7574.828) [...7 remote chains...] -- 1:28:22

12900000 -- (-7541.353) [...7 remote chains...] -- 1:28:19

Average standard deviation of split frequencies: 0.010468

12910000 -- (-7559.825) [...7 remote chains...] -- 1:28:16

12920000 -- (-7570.252) [...7 remote chains...] -- 1:28:13

12930000 -- (-7566.456) [...7 remote chains...] -- 1:28:09

12940000 -- (-7571.406) [...7 remote chains...] -- 1:28:06

12950000 -- (-7569.168) [...7 remote chains...] -- 1:28:03

Average standard deviation of split frequencies: 0.010370

12960000 -- (-7570.005) [...7 remote chains...] -- 1:28:00

12970000 -- (-7538.975) [...7 remote chains...] -- 1:27:57

12980000 -- (-7547.672) [...7 remote chains...] -- 1:27:53

12990000 -- (-7560.892) [...7 remote chains...] -- 1:27:50

13000000 -- (-7587.857) [...7 remote chains...] -- 1:27:47

Average standard deviation of split frequencies: 0.010397

13010000 -- (-7568.836) [...7 remote chains...] -- 1:27:44

13020000 -- (-7568.704) [...7 remote chains...] -- 1:27:40

13030000 -- (-7563.286) [...7 remote chains...] -- 1:27:37

13040000 -- (-7555.096) [...7 remote chains...] -- 1:27:35

13050000 -- (-7553.625) [...7 remote chains...] -- 1:27:32

Average standard deviation of split frequencies: 0.010457

13060000 -- (-7568.903) [...7 remote chains...] -- 1:27:29

13070000 -- (-7575.440) [...7 remote chains...] -- 1:27:26

13080000 -- (-7561.707) [...7 remote chains...] -- 1:27:22

13090000 -- (-7557.394) [...7 remote chains...] -- 1:27:19

13100000 -- (-7570.662) [...7 remote chains...] -- 1:27:16

Average standard deviation of split frequencies: 0.010292

13110000 -- (-7578.178) [...7 remote chains...] -- 1:27:13

13120000 -- (-7562.041) [...7 remote chains...] -- 1:27:09

13130000 -- (-7575.800) [...7 remote chains...] -- 1:27:06

13140000 -- (-7548.984) [...7 remote chains...] -- 1:27:03

13150000 -- (-7560.070) [...7 remote chains...] -- 1:27:00

Average standard deviation of split frequencies: 0.010133

13160000 -- (-7553.486) [...7 remote chains...] -- 1:26:57

13170000 -- (-7543.327) [...7 remote chains...] -- 1:26:53

13180000 -- (-7550.442) [...7 remote chains...] -- 1:26:50

13190000 -- (-7550.660) [...7 remote chains...] -- 1:26:47

13200000 -- (-7568.781) [...7 remote chains...] -- 1:26:44

Average standard deviation of split frequencies: 0.010060

13210000 -- (-7556.569) [...7 remote chains...] -- 1:26:40

13220000 -- (-7580.885) [...7 remote chains...] -- 1:26:37

13230000 -- (-7555.459) [...7 remote chains...] -- 1:26:34

13240000 -- (-7554.026) [...7 remote chains...] -- 1:26:31

13250000 -- (-7546.759) [...7 remote chains...] -- 1:26:28

Average standard deviation of split frequencies: 0.009828

13260000 -- (-7574.727) [...7 remote chains...] -- 1:26:24

13270000 -- (-7564.818) [...7 remote chains...] -- 1:26:21

13280000 -- (-7570.359) [...7 remote chains...] -- 1:26:18

13290000 -- (-7542.544) [...7 remote chains...] -- 1:26:16

13300000 -- (-7557.967) [...7 remote chains...] -- 1:26:13

Average standard deviation of split frequencies: 0.009872

13310000 -- (-7552.226) [...7 remote chains...] -- 1:26:10

13320000 -- (-7537.526) [...7 remote chains...] -- 1:26:06

13330000 -- (-7559.663) [...7 remote chains...] -- 1:26:03

13340000 -- (-7549.955) [...7 remote chains...] -- 1:26:00

13350000 -- (-7568.201) [...7 remote chains...] -- 1:25:57

Average standard deviation of split frequencies: 0.009980

13360000 -- [-7552.044] [...7 remote chains...] -- 1:25:53

13370000 -- (-7548.213) [...7 remote chains...] -- 1:25:50

13380000 -- [-7539.738] [...7 remote chains...] -- 1:25:47

13390000 -- [-7552.774] [...7 remote chains...] -- 1:25:44

13400000 -- (-7558.466) [...7 remote chains...] -- 1:25:41

Average standard deviation of split frequencies: 0.010105

13410000 -- (-7553.013) [...7 remote chains...] -- 1:25:37

13420000 -- (-7556.766) [...7 remote chains...] -- 1:25:34

13430000 -- (-7553.751) [...7 remote chains...] -- 1:25:31

13440000 -- (-7566.649) [...7 remote chains...] -- 1:25:28

13450000 -- (-7548.292) [...7 remote chains...] -- 1:25:24

Average standard deviation of split frequencies: 0.010170

13460000 -- (-7555.607) [...7 remote chains...] -- 1:25:21

13470000 -- (-7543.698) [...7 remote chains...] -- 1:25:18

13480000 -- (-7570.062) [...7 remote chains...] -- 1:25:15

13490000 -- (-7566.204) [...7 remote chains...] -- 1:25:12

13500000 -- (-7560.635) [...7 remote chains...] -- 1:25:10

Average standard deviation of split frequencies: 0.010095

13510000 -- (-7563.020) [...7 remote chains...] -- 1:25:06

13520000 -- (-7576.516) [...7 remote chains...] -- 1:25:03

13530000 -- (-7589.723) [...7 remote chains...] -- 1:25:00

13540000 -- (-7544.406) [...7 remote chains...] -- 1:24:57

13550000 -- (-7550.799) [...7 remote chains...] -- 1:24:54

Average standard deviation of split frequencies: 0.010016

13560000 -- (-7555.609) [...7 remote chains...] -- 1:24:50

13570000 -- (-7561.738) [...7 remote chains...] -- 1:24:47

13580000 -- (-7581.811) [...7 remote chains...] -- 1:24:44

13590000 -- (-7561.785) [...7 remote chains...] -- 1:24:41

13600000 -- (-7570.918) [...7 remote chains...] -- 1:24:37

Average standard deviation of split frequencies: 0.010050

13610000 -- (-7553.362) [...7 remote chains...] -- 1:24:34

13620000 -- (-7566.045) [...7 remote chains...] -- 1:24:31

13630000 -- (-7555.563) [...7 remote chains...] -- 1:24:28

13640000 -- (-7543.210) [...7 remote chains...] -- 1:24:25

13650000 -- (-7550.071) [...7 remote chains...] -- 1:24:21

Average standard deviation of split frequencies: 0.010021

13660000 -- (-7557.471) [...7 remote chains...] -- 1:24:18

13670000 -- (-7531.264) [...7 remote chains...] -- 1:24:15

13680000 -- (-7524.806) [...7 remote chains...] -- 1:24:12

13690000 -- (-7570.278) [...7 remote chains...] -- 1:24:09

13700000 -- (-7572.554) [...7 remote chains...] -- 1:24:05

Average standard deviation of split frequencies: 0.010044

13710000 -- (-7564.166) [...7 remote chains...] -- 1:24:02

13720000 -- (-7550.584) [...7 remote chains...] -- 1:23:59

13730000 -- (-7551.522) [...7 remote chains...] -- 1:23:56

13740000 -- (-7546.686) [...7 remote chains...] -- 1:23:53

13750000 -- (-7556.080) [...7 remote chains...] -- 1:23:51

Average standard deviation of split frequencies: 0.010209

13760000 -- (-7547.523) [...7 remote chains...] -- 1:23:47

13770000 -- (-7563.482) [...7 remote chains...] -- 1:23:44

13780000 -- (-7554.311) [...7 remote chains...] -- 1:23:41

13790000 -- (-7562.801) [...7 remote chains...] -- 1:23:38

13800000 -- (-7544.765) [...7 remote chains...] -- 1:23:34

Average standard deviation of split frequencies: 0.010359

13810000 -- (-7564.931) [...7 remote chains...] -- 1:23:31

13820000 -- (-7558.348) [...7 remote chains...] -- 1:23:28

13830000 -- (-7574.674) [...7 remote chains...] -- 1:23:25

13840000 -- (-7544.440) [...7 remote chains...] -- 1:23:22

13850000 -- (-7558.707) [...7 remote chains...] -- 1:23:18

Average standard deviation of split frequencies: 0.010575

13860000 -- (-7552.497) [...7 remote chains...] -- 1:23:15

13870000 -- (-7549.311) [...7 remote chains...] -- 1:23:12

13880000 -- [-7553.795] [...7 remote chains...] -- 1:23:09

13890000 -- [-7549.395] [...7 remote chains...] -- 1:23:06

13900000 -- (-7560.783) [...7 remote chains...] -- 1:23:02

Average standard deviation of split frequencies: 0.010520

13910000 -- (-7546.160) [...7 remote chains...] -- 1:23:00

13920000 -- (-7555.001) [...7 remote chains...] -- 1:22:57

13930000 -- (-7565.730) [...7 remote chains...] -- 1:22:54

13940000 -- (-7554.705) [...7 remote chains...] -- 1:22:51

13950000 -- (-7550.169) [...7 remote chains...] -- 1:22:48

Average standard deviation of split frequencies: 0.010664

13960000 -- (-7555.609) [...7 remote chains...] -- 1:22:44

13970000 -- (-7541.610) [...7 remote chains...] -- 1:22:41

13980000 -- (-7554.884) [...7 remote chains...] -- 1:22:38

13990000 -- (-7557.871) [...7 remote chains...] -- 1:22:35

14000000 -- (-7557.283) [...7 remote chains...] -- 1:22:32

Average standard deviation of split frequencies: 0.010606

14010000 -- (-7545.927) [...7 remote chains...] -- 1:22:28

14020000 -- (-7551.595) [...7 remote chains...] -- 1:22:25

14030000 -- (-7548.496) [...7 remote chains...] -- 1:22:22

14040000 -- (-7544.196) [...7 remote chains...] -- 1:22:19

14050000 -- (-7542.633) [...7 remote chains...] -- 1:22:15

Average standard deviation of split frequencies: 0.010521

14060000 -- (-7545.577) [...7 remote chains...] -- 1:22:12

14070000 -- (-7563.972) [...7 remote chains...] -- 1:22:09

14080000 -- (-7542.307) [...7 remote chains...] -- 1:22:06

14090000 -- [-7543.303] [...7 remote chains...] -- 1:22:03

14100000 -- [-7541.256] [...7 remote chains...] -- 1:21:59

Average standard deviation of split frequencies: 0.010483

14110000 -- [-7544.874] [...7 remote chains...] -- 1:21:56

14120000 -- [-7557.924] [...7 remote chains...] -- 1:21:53

14130000 -- [-7561.249] [...7 remote chains...] -- 1:21:50

14140000 -- [-7553.841] [...7 remote chains...] -- 1:21:47

14150000 -- [-7555.244] [...7 remote chains...] -- 1:21:43

Average standard deviation of split frequencies: 0.010640

14160000 -- [-7553.909] [...7 remote chains...] -- 1:21:41

14170000 -- [-7545.126] [...7 remote chains...] -- 1:21:38

14180000 -- [-7554.650] [...7 remote chains...] -- 1:21:35

14190000 -- [-7541.111] [...7 remote chains...] -- 1:21:32

14200000 -- [-7542.568] [...7 remote chains...] -- 1:21:29

Average standard deviation of split frequencies: 0.010612

14210000 -- [-7548.904] [...7 remote chains...] -- 1:21:25

14220000 -- [-7549.051] [...7 remote chains...] -- 1:21:22

14230000 -- [-7549.755] [...7 remote chains...] -- 1:21:19

14240000 -- (-7559.465) [...7 remote chains...] -- 1:21:16

14250000 -- [-7564.634] [...7 remote chains...] -- 1:21:13

Average standard deviation of split frequencies: 0.010425

14260000 -- [-7555.190] [...7 remote chains...] -- 1:21:09

14270000 -- [-7561.898] [...7 remote chains...] -- 1:21:06

14280000 -- [-7547.094] [...7 remote chains...] -- 1:21:03

14290000 -- [-7545.313] [...7 remote chains...] -- 1:21:00

14300000 -- [-7542.930] [...7 remote chains...] -- 1:20:57

Average standard deviation of split frequencies: 0.010420

14310000 -- [-7559.999] [...7 remote chains...] -- 1:20:53

14320000 -- [-7570.733] [...7 remote chains...] -- 1:20:50

14330000 -- (-7561.466) [...7 remote chains...] -- 1:20:47

14340000 -- (-7561.495) [...7 remote chains...] -- 1:20:44

14350000 -- (-7546.303) [...7 remote chains...] -- 1:20:42

Average standard deviation of split frequencies: 0.010457

14360000 -- (-7549.775) [...7 remote chains...] -- 1:20:39

14370000 -- (-7566.820) [...7 remote chains...] -- 1:20:35

14380000 -- (-7571.177) [...7 remote chains...] -- 1:20:32

14390000 -- (-7570.226) [...7 remote chains...] -- 1:20:29

14400000 -- (-7540.210) [...7 remote chains...] -- 1:20:26

Average standard deviation of split frequencies: 0.010448

14410000 -- (-7576.441) [...7 remote chains...] -- 1:20:23

14420000 -- (-7562.879) [...7 remote chains...] -- 1:20:19

14430000 -- (-7565.566) [...7 remote chains...] -- 1:20:16

14440000 -- (-7568.263) [...7 remote chains...] -- 1:20:13

14450000 -- (-7536.913) [...7 remote chains...] -- 1:20:10

Average standard deviation of split frequencies: 0.010464

14460000 -- (-7560.062) [...7 remote chains...] -- 1:20:07

14470000 -- (-7548.199) [...7 remote chains...] -- 1:20:03

14480000 -- (-7572.767) [...7 remote chains...] -- 1:20:00

14490000 -- (-7567.986) [...7 remote chains...] -- 1:19:57

14500000 -- (-7556.994) [...7 remote chains...] -- 1:19:54

Average standard deviation of split frequencies: 0.010499

14510000 -- (-7537.675) [...7 remote chains...] -- 1:19:51

14520000 -- (-7568.610) [...7 remote chains...] -- 1:19:47

14530000 -- (-7562.000) [...7 remote chains...] -- 1:19:44

14540000 -- (-7561.309) [...7 remote chains...] -- 1:19:41

14550000 -- (-7551.621) [...7 remote chains...] -- 1:19:38

Average standard deviation of split frequencies: 0.010552

14560000 -- (-7552.967) [...7 remote chains...] -- 1:19:35

14570000 -- (-7541.908) [...7 remote chains...] -- 1:19:31

14580000 -- (-7559.415) [...7 remote chains...] -- 1:19:28

14590000 -- (-7558.980) [...7 remote chains...] -- 1:19:25

14600000 -- (-7551.567) [...7 remote chains...] -- 1:19:23

Average standard deviation of split frequencies: 0.010500

14610000 -- (-7574.801) [...7 remote chains...] -- 1:19:20

14620000 -- (-7566.100) [...7 remote chains...] -- 1:19:17

14630000 -- (-7580.383) [...7 remote chains...] -- 1:19:13

14640000 -- (-7574.936) [...7 remote chains...] -- 1:19:10

14650000 -- (-7541.031) [...7 remote chains...] -- 1:19:07

Average standard deviation of split frequencies: 0.010496

14660000 -- (-7543.714) [...7 remote chains...] -- 1:19:04

14670000 -- (-7528.310) [...7 remote chains...] -- 1:19:01

14680000 -- (-7558.942) [...7 remote chains...] -- 1:18:57

14690000 -- (-7557.992) [...7 remote chains...] -- 1:18:54

14700000 -- (-7540.708) [...7 remote chains...] -- 1:18:51

Average standard deviation of split frequencies: 0.010553

14710000 -- (-7571.374) [...7 remote chains...] -- 1:18:48

14720000 -- (-7548.272) [...7 remote chains...] -- 1:18:45

14730000 -- (-7552.114) [...7 remote chains...] -- 1:18:41

14740000 -- (-7568.817) [...7 remote chains...] -- 1:18:38

14750000 -- (-7556.305) [...7 remote chains...] -- 1:18:35

Average standard deviation of split frequencies: 0.010468

14760000 -- (-7538.584) [...7 remote chains...] -- 1:18:32

14770000 -- (-7522.147) [...7 remote chains...] -- 1:18:29

14780000 -- (-7552.261) [...7 remote chains...] -- 1:18:26

14790000 -- (-7560.584) [...7 remote chains...] -- 1:18:22

14800000 -- (-7553.031) [...7 remote chains...] -- 1:18:19

Average standard deviation of split frequencies: 0.010581

14810000 -- (-7564.182) [...7 remote chains...] -- 1:18:16

14820000 -- (-7554.062) [...7 remote chains...] -- 1:18:13

14830000 -- (-7551.596) [...7 remote chains...] -- 1:18:10

14840000 -- (-7562.885) [...7 remote chains...] -- 1:18:06

14850000 -- (-7550.892) [...7 remote chains...] -- 1:18:03

Average standard deviation of split frequencies: 0.010368

14860000 -- (-7570.054) [...7 remote chains...] -- 1:18:00

14870000 -- (-7597.481) [...7 remote chains...] -- 1:17:57

14880000 -- (-7571.299) [...7 remote chains...] -- 1:17:54

14890000 -- (-7561.403) [...7 remote chains...] -- 1:17:51

14900000 -- (-7565.450) [...7 remote chains...] -- 1:17:47

Average standard deviation of split frequencies: 0.010408

14910000 -- (-7549.708) [...7 remote chains...] -- 1:17:44

14920000 -- (-7555.727) [...7 remote chains...] -- 1:17:42

14930000 -- (-7535.718) [...7 remote chains...] -- 1:17:39

14940000 -- (-7552.097) [...7 remote chains...] -- 1:17:36

14950000 -- (-7566.138) [...7 remote chains...] -- 1:17:32

Average standard deviation of split frequencies: 0.010433

14960000 -- (-7570.554) [...7 remote chains...] -- 1:17:29

14970000 -- (-7552.401) [...7 remote chains...] -- 1:17:26

14980000 -- (-7571.737) [...7 remote chains...] -- 1:17:23

14990000 -- (-7543.478) [...7 remote chains...] -- 1:17:20

15000000 -- (-7527.870) [...7 remote chains...] -- 1:17:17

Average standard deviation of split frequencies: 0.010530

15010000 -- (-7566.985) [...7 remote chains...] -- 1:17:13

15020000 -- (-7568.034) [...7 remote chains...] -- 1:17:10

15030000 -- (-7541.913) [...7 remote chains...] -- 1:17:07

15040000 -- (-7545.476) [...7 remote chains...] -- 1:17:04

15050000 -- (-7561.397) [...7 remote chains...] -- 1:17:01

Average standard deviation of split frequencies: 0.010435

15060000 -- [-7542.461] [...7 remote chains...] -- 1:16:57

15070000 -- [-7535.317] [...7 remote chains...] -- 1:16:54

15080000 -- (-7557.032) [...7 remote chains...] -- 1:16:51

15090000 -- (-7563.769) [...7 remote chains...] -- 1:16:48

15100000 -- (-7542.080) [...7 remote chains...] -- 1:16:45

Average standard deviation of split frequencies: 0.010176

15110000 -- (-7555.519) [...7 remote chains...] -- 1:16:42

15120000 -- (-7549.372) [...7 remote chains...] -- 1:16:38

15130000 -- (-7558.616) [...7 remote chains...] -- 1:16:35

15140000 -- (-7555.539) [...7 remote chains...] -- 1:16:32

15150000 -- (-7552.295) [...7 remote chains...] -- 1:16:29

Average standard deviation of split frequencies: 0.009781

15160000 -- (-7524.381) [...7 remote chains...] -- 1:16:26

15170000 -- (-7552.160) [...7 remote chains...] -- 1:16:22

15180000 -- (-7569.652) [...7 remote chains...] -- 1:16:19

15190000 -- (-7549.738) [...7 remote chains...] -- 1:16:16

15200000 -- (-7546.097) [...7 remote chains...] -- 1:16:14

Average standard deviation of split frequencies: 0.009822

15210000 -- (-7539.602) [...7 remote chains...] -- 1:16:11

15220000 -- (-7550.131) [...7 remote chains...] -- 1:16:08

15230000 -- (-7534.165) [...7 remote chains...] -- 1:16:04

15240000 -- (-7557.267) [...7 remote chains...] -- 1:16:01

15250000 -- (-7564.395) [...7 remote chains...] -- 1:15:58

Average standard deviation of split frequencies: 0.009468

15260000 -- (-7568.495) [...7 remote chains...] -- 1:15:55

15270000 -- (-7571.865) [...7 remote chains...] -- 1:15:52

15280000 -- (-7564.061) [...7 remote chains...] -- 1:15:48

15290000 -- (-7550.347) [...7 remote chains...] -- 1:15:45

15300000 -- (-7552.668) [...7 remote chains...] -- 1:15:42

Average standard deviation of split frequencies: 0.008971

15310000 -- (-7554.788) [...7 remote chains...] -- 1:15:39

15320000 -- (-7575.392) [...7 remote chains...] -- 1:15:36

15330000 -- [-7573.059] [...7 remote chains...] -- 1:15:33

15340000 -- (-7558.436) [...7 remote chains...] -- 1:15:29

15350000 -- (-7568.265) [...7 remote chains...] -- 1:15:26

Average standard deviation of split frequencies: 0.008765

15360000 -- (-7536.115) [...7 remote chains...] -- 1:15:23

15370000 -- (-7564.746) [...7 remote chains...] -- 1:15:20

15380000 -- (-7560.523) [...7 remote chains...] -- 1:15:17

15390000 -- (-7554.473) [...7 remote chains...] -- 1:15:14

15400000 -- (-7555.569) [...7 remote chains...] -- 1:15:10

Average standard deviation of split frequencies: 0.008487

15410000 -- (-7555.944) [...7 remote chains...] -- 1:15:07

15420000 -- (-7556.938) [...7 remote chains...] -- 1:15:05

15430000 -- [-7538.665] [...7 remote chains...] -- 1:15:02

15440000 -- [-7553.603] [...7 remote chains...] -- 1:14:59

15450000 -- [-7545.121] [...7 remote chains...] -- 1:14:55

Average standard deviation of split frequencies: 0.008547

15460000 -- (-7564.199) [...7 remote chains...] -- 1:14:52

15470000 -- [-7549.874] [...7 remote chains...] -- 1:14:49

15480000 -- (-7559.247) [...7 remote chains...] -- 1:14:46

15490000 -- (-7546.197) [...7 remote chains...] -- 1:14:43

15500000 -- (-7548.364) [...7 remote chains...] -- 1:14:40

Average standard deviation of split frequencies: 0.008232

15510000 -- [-7550.567] [...7 remote chains...] -- 1:14:36

15520000 -- (-7566.577) [...7 remote chains...] -- 1:14:33

15530000 -- (-7553.037) [...7 remote chains...] -- 1:14:30

15540000 -- (-7529.383) [...7 remote chains...] -- 1:14:27

15550000 -- (-7550.188) [...7 remote chains...] -- 1:14:24

Average standard deviation of split frequencies: 0.008331

15560000 -- (-7556.841) [...7 remote chains...] -- 1:14:20

15570000 -- [-7546.040] [...7 remote chains...] -- 1:14:17

15580000 -- [-7546.708] [...7 remote chains...] -- 1:14:14

15590000 -- [-7552.832] [...7 remote chains...] -- 1:14:11

15600000 -- [-7540.282] [...7 remote chains...] -- 1:14:08

Average standard deviation of split frequencies: 0.008308

15610000 -- (-7561.035) [...7 remote chains...] -- 1:14:05

15620000 -- (-7559.288) [...7 remote chains...] -- 1:14:01

15630000 -- (-7577.148) [...7 remote chains...] -- 1:13:58

15640000 -- (-7544.265) [...7 remote chains...] -- 1:13:55

15650000 -- (-7575.791) [...7 remote chains...] -- 1:13:52

Average standard deviation of split frequencies: 0.008275

15660000 -- (-7589.633) [...7 remote chains...] -- 1:13:49

15670000 -- (-7552.198) [...7 remote chains...] -- 1:13:46

15680000 -- (-7573.923) [...7 remote chains...] -- 1:13:42

15690000 -- (-7556.205) [...7 remote chains...] -- 1:13:39

15700000 -- (-7541.522) [...7 remote chains...] -- 1:13:36

Average standard deviation of split frequencies: 0.007920

15710000 -- (-7552.449) [...7 remote chains...] -- 1:13:34

15720000 -- (-7555.212) [...7 remote chains...] -- 1:13:31

15730000 -- [-7561.763] [...7 remote chains...] -- 1:13:28

15740000 -- [-7553.068] [...7 remote chains...] -- 1:13:24

15750000 -- [-7552.964] [...7 remote chains...] -- 1:13:21

Average standard deviation of split frequencies: 0.007809

15760000 -- (-7567.184) [...7 remote chains...] -- 1:13:18

15770000 -- (-7572.592) [...7 remote chains...] -- 1:13:15

15780000 -- (-7552.862) [...7 remote chains...] -- 1:13:12

15790000 -- [-7555.556] [...7 remote chains...] -- 1:13:08

15800000 -- (-7567.917) [...7 remote chains...] -- 1:13:05

Average standard deviation of split frequencies: 0.007819

15810000 -- (-7543.071) [...7 remote chains...] -- 1:13:02

15820000 -- (-7536.645) [...7 remote chains...] -- 1:12:59

15830000 -- (-7553.150) [...7 remote chains...] -- 1:12:56

15840000 -- (-7555.569) [...7 remote chains...] -- 1:12:53

15850000 -- (-7555.041) [...7 remote chains...] -- 1:12:49

Average standard deviation of split frequencies: 0.007927

15860000 -- (-7543.119) [...7 remote chains...] -- 1:12:46

15870000 -- [-7538.052] [...7 remote chains...] -- 1:12:43

15880000 -- (-7555.050) [...7 remote chains...] -- 1:12:40

15890000 -- (-7542.723) [...7 remote chains...] -- 1:12:37

15900000 -- (-7558.270) [...7 remote chains...] -- 1:12:34

Average standard deviation of split frequencies: 0.007952

15910000 -- (-7539.986) [...7 remote chains...] -- 1:12:30

15920000 -- (-7547.049) [...7 remote chains...] -- 1:12:27

15930000 -- (-7545.525) [...7 remote chains...] -- 1:12:24

15940000 -- (-7576.578) [...7 remote chains...] -- 1:12:21

15950000 -- (-7569.532) [...7 remote chains...] -- 1:12:18

Average standard deviation of split frequencies: 0.007923

15960000 -- (-7566.532) [...7 remote chains...] -- 1:12:15

15970000 -- (-7556.831) [...7 remote chains...] -- 1:12:11

15980000 -- (-7550.234) [...7 remote chains...] -- 1:12:08

15990000 -- (-7537.945) [...7 remote chains...] -- 1:12:06

16000000 -- (-7572.491) [...7 remote chains...] -- 1:12:03

Average standard deviation of split frequencies: 0.007903

16010000 -- (-7555.233) [...7 remote chains...] -- 1:12:00

16020000 -- (-7538.691) [...7 remote chains...] -- 1:11:57

16030000 -- (-7550.573) [...7 remote chains...] -- 1:11:53

16040000 -- (-7573.223) [...7 remote chains...] -- 1:11:50

16050000 -- (-7568.407) [...7 remote chains...] -- 1:11:46

Average standard deviation of split frequencies: 0.007812

16060000 -- (-7581.546) [...7 remote chains...] -- 1:11:43

16070000 -- (-7562.584) [...7 remote chains...] -- 1:11:41

16080000 -- (-7554.909) [...7 remote chains...] -- 1:11:38

16090000 -- (-7543.890) [...7 remote chains...] -- 1:11:34

16100000 -- (-7565.041) [...7 remote chains...] -- 1:11:31

Average standard deviation of split frequencies: 0.007788

16110000 -- (-7583.091) [...7 remote chains...] -- 1:11:28

16120000 -- (-7569.565) [...7 remote chains...] -- 1:11:25

16130000 -- (-7563.401) [...7 remote chains...] -- 1:11:22

16140000 -- (-7541.042) [...7 remote chains...] -- 1:11:19

16150000 -- (-7553.405) [...7 remote chains...] -- 1:11:15

Average standard deviation of split frequencies: 0.007773

16160000 -- (-7561.370) [...7 remote chains...] -- 1:11:12

16170000 -- (-7598.192) [...7 remote chains...] -- 1:11:09

16180000 -- (-7560.423) [...7 remote chains...] -- 1:11:06

16190000 -- (-7548.365) [...7 remote chains...] -- 1:11:03

16200000 -- (-7564.204) [...7 remote chains...] -- 1:11:00

Average standard deviation of split frequencies: 0.007563

16210000 -- (-7558.198) [...7 remote chains...] -- 1:10:56

16220000 -- (-7551.032) [...7 remote chains...] -- 1:10:53

16230000 -- (-7555.181) [...7 remote chains...] -- 1:10:50

16240000 -- (-7558.465) [...7 remote chains...] -- 1:10:47

16250000 -- (-7554.059) [...7 remote chains...] -- 1:10:44

Average standard deviation of split frequencies: 0.007433

16260000 -- [-7544.342] [...7 remote chains...] -- 1:10:41

16270000 -- [-7554.103] [...7 remote chains...] -- 1:10:37

16280000 -- (-7548.413) [...7 remote chains...] -- 1:10:34

16290000 -- (-7567.934) [...7 remote chains...] -- 1:10:31

16300000 -- (-7559.092) [...7 remote chains...] -- 1:10:28

Average standard deviation of split frequencies: 0.007392

16310000 -- (-7541.630) [...7 remote chains...] -- 1:10:25

16320000 -- (-7542.075) [...7 remote chains...] -- 1:10:22

16330000 -- (-7549.646) [...7 remote chains...] -- 1:10:19

16340000 -- (-7567.129) [...7 remote chains...] -- 1:10:16

16350000 -- (-7549.856) [...7 remote chains...] -- 1:10:13

Average standard deviation of split frequencies: 0.007251

16360000 -- (-7570.134) [...7 remote chains...] -- 1:10:10

16370000 -- (-7553.853) [...7 remote chains...] -- 1:10:07

16380000 -- (-7558.566) [...7 remote chains...] -- 1:10:04

16390000 -- (-7571.721) [...7 remote chains...] -- 1:10:00

16400000 -- [-7539.958] [...7 remote chains...] -- 1:09:57

Average standard deviation of split frequencies: 0.007173

16410000 -- (-7537.788) [...7 remote chains...] -- 1:09:54

16420000 -- (-7553.159) [...7 remote chains...] -- 1:09:51

16430000 -- [-7539.503] [...7 remote chains...] -- 1:09:48

16440000 -- [-7564.169] [...7 remote chains...] -- 1:09:45

16450000 -- [-7539.289] [...7 remote chains...] -- 1:09:41

Average standard deviation of split frequencies: 0.007006

16460000 -- [-7535.148] [...7 remote chains...] -- 1:09:38

16470000 -- [-7543.493] [...7 remote chains...] -- 1:09:35

16480000 -- (-7548.525) [...7 remote chains...] -- 1:09:32

16490000 -- (-7575.531) [...7 remote chains...] -- 1:09:29

16500000 -- (-7570.172) [...7 remote chains...] -- 1:09:26

Average standard deviation of split frequencies: 0.006885

16510000 -- (-7570.649) [...7 remote chains...] -- 1:09:23

16520000 -- (-7564.782) [...7 remote chains...] -- 1:09:19

16530000 -- (-7572.338) [...7 remote chains...] -- 1:09:16

16540000 -- (-7540.188) [...7 remote chains...] -- 1:09:13

16550000 -- (-7545.814) [...7 remote chains...] -- 1:09:10

Average standard deviation of split frequencies: 0.006916

16560000 -- (-7547.324) [...7 remote chains...] -- 1:09:07

16570000 -- (-7556.511) [...7 remote chains...] -- 1:09:04

16580000 -- (-7562.501) [...7 remote chains...] -- 1:09:00

16590000 -- (-7561.738) [...7 remote chains...] -- 1:08:57

16600000 -- (-7546.211) [...7 remote chains...] -- 1:08:54

Average standard deviation of split frequencies: 0.006947

16610000 -- (-7551.462) [...7 remote chains...] -- 1:08:51

16620000 -- (-7558.799) [...7 remote chains...] -- 1:08:48

16630000 -- (-7553.925) [...7 remote chains...] -- 1:08:45

16640000 -- (-7571.421) [...7 remote chains...] -- 1:08:42

16650000 -- (-7554.608) [...7 remote chains...] -- 1:08:38

Average standard deviation of split frequencies: 0.007003

16660000 -- (-7554.231) [...7 remote chains...] -- 1:08:35

16670000 -- (-7565.613) [...7 remote chains...] -- 1:08:32

16680000 -- (-7569.804) [...7 remote chains...] -- 1:08:29

16690000 -- (-7540.116) [...7 remote chains...] -- 1:08:26

16700000 -- (-7561.297) [...7 remote chains...] -- 1:08:23

Average standard deviation of split frequencies: 0.007088

16710000 -- (-7553.887) [...7 remote chains...] -- 1:08:19

16720000 -- [-7547.857] [...7 remote chains...] -- 1:08:17

16730000 -- (-7559.520) [...7 remote chains...] -- 1:08:14

16740000 -- (-7565.688) [...7 remote chains...] -- 1:08:11

16750000 -- (-7569.701) [...7 remote chains...] -- 1:08:08

Average standard deviation of split frequencies: 0.007016

16760000 -- (-7553.797) [...7 remote chains...] -- 1:08:04

16770000 -- (-7546.424) [...7 remote chains...] -- 1:08:01

16780000 -- (-7561.765) [...7 remote chains...] -- 1:07:58

16790000 -- (-7554.355) [...7 remote chains...] -- 1:07:55

16800000 -- (-7581.174) [...7 remote chains...] -- 1:07:52

Average standard deviation of split frequencies: 0.007110

16810000 -- (-7574.531) [...7 remote chains...] -- 1:07:49

16820000 -- (-7572.471) [...7 remote chains...] -- 1:07:46

16830000 -- (-7561.367) [...7 remote chains...] -- 1:07:42

16840000 -- (-7547.335) [...7 remote chains...] -- 1:07:39

16850000 -- (-7555.317) [...7 remote chains...] -- 1:07:36

Average standard deviation of split frequencies: 0.007143

16860000 -- (-7549.895) [...7 remote chains...] -- 1:07:33

16870000 -- (-7553.427) [...7 remote chains...] -- 1:07:30

16880000 -- [-7558.138] [...7 remote chains...] -- 1:07:27

16890000 -- [-7542.384] [...7 remote chains...] -- 1:07:23

16900000 -- [-7562.163] [...7 remote chains...] -- 1:07:20

Average standard deviation of split frequencies: 0.007116

16910000 -- [-7554.147] [...7 remote chains...] -- 1:07:18

16920000 -- (-7561.958) [...7 remote chains...] -- 1:07:15

16930000 -- (-7564.995) [...7 remote chains...] -- 1:07:12

16940000 -- [-7549.343] [...7 remote chains...] -- 1:07:09

16950000 -- [-7565.652] [...7 remote chains...] -- 1:07:05

Average standard deviation of split frequencies: 0.007139

16960000 -- [-7556.268] [...7 remote chains...] -- 1:07:02

16970000 -- (-7566.120) [...7 remote chains...] -- 1:06:59

16980000 -- (-7570.406) [...7 remote chains...] -- 1:06:56

16990000 -- (-7575.214) [...7 remote chains...] -- 1:06:53

17000000 -- (-7559.249) [...7 remote chains...] -- 1:06:50

Average standard deviation of split frequencies: 0.006966

17010000 -- [-7547.359] [...7 remote chains...] -- 1:06:46

17020000 -- [-7540.857] [...7 remote chains...] -- 1:06:43

17030000 -- [-7538.062] [...7 remote chains...] -- 1:06:40

17040000 -- (-7551.872) [...7 remote chains...] -- 1:06:37

17050000 -- (-7557.581) [...7 remote chains...] -- 1:06:34

Average standard deviation of split frequencies: 0.007160

17060000 -- (-7542.218) [...7 remote chains...] -- 1:06:31

17070000 -- (-7543.962) [...7 remote chains...] -- 1:06:28

17080000 -- (-7549.874) [...7 remote chains...] -- 1:06:24

17090000 -- (-7555.049) [...7 remote chains...] -- 1:06:21

17100000 -- (-7569.200) [...7 remote chains...] -- 1:06:18

Average standard deviation of split frequencies: 0.007224

17110000 -- (-7566.862) [...7 remote chains...] -- 1:06:15

17120000 -- (-7551.569) [...7 remote chains...] -- 1:06:12

17130000 -- (-7553.741) [...7 remote chains...] -- 1:06:09

17140000 -- (-7548.276) [...7 remote chains...] -- 1:06:06

17150000 -- (-7574.563) [...7 remote chains...] -- 1:06:02

Average standard deviation of split frequencies: 0.007061

17160000 -- (-7567.771) [...7 remote chains...] -- 1:05:59

17170000 -- (-7575.992) [...7 remote chains...] -- 1:05:56

17180000 -- (-7554.724) [...7 remote chains...] -- 1:05:54

17190000 -- (-7574.877) [...7 remote chains...] -- 1:05:50

17200000 -- (-7542.672) [...7 remote chains...] -- 1:05:47

Average standard deviation of split frequencies: 0.006805

17210000 -- (-7553.670) [...7 remote chains...] -- 1:05:44

17220000 -- (-7562.973) [...7 remote chains...] -- 1:05:41

17230000 -- (-7568.934) [...7 remote chains...] -- 1:05:38

17240000 -- (-7551.895) [...7 remote chains...] -- 1:05:35

17250000 -- (-7562.932) [...7 remote chains...] -- 1:05:32

Average standard deviation of split frequencies: 0.006829

17260000 -- (-7558.051) [...7 remote chains...] -- 1:05:29

17270000 -- (-7556.869) [...7 remote chains...] -- 1:05:25

17280000 -- (-7552.047) [...7 remote chains...] -- 1:05:22

17290000 -- (-7554.716) [...7 remote chains...] -- 1:05:19

17300000 -- (-7572.177) [...7 remote chains...] -- 1:05:16

Average standard deviation of split frequencies: 0.006848

17310000 -- (-7552.843) [...7 remote chains...] -- 1:05:13

17320000 -- (-7555.298) [...7 remote chains...] -- 1:05:10

17330000 -- (-7544.609) [...7 remote chains...] -- 1:05:07

17340000 -- (-7535.373) [...7 remote chains...] -- 1:05:03

17350000 -- (-7564.435) [...7 remote chains...] -- 1:05:00

Average standard deviation of split frequencies: 0.006835

17360000 -- (-7578.449) [...7 remote chains...] -- 1:04:57

17370000 -- (-7552.829) [...7 remote chains...] -- 1:04:54

17380000 -- (-7566.025) [...7 remote chains...] -- 1:04:51

17390000 -- (-7553.450) [...7 remote chains...] -- 1:04:48

17400000 -- (-7576.644) [...7 remote chains...] -- 1:04:45

Average standard deviation of split frequencies: 0.006861

17410000 -- (-7574.295) [...7 remote chains...] -- 1:04:42

17420000 -- (-7558.973) [...7 remote chains...] -- 1:04:39

17430000 -- (-7550.817) [...7 remote chains...] -- 1:04:36

17440000 -- (-7562.801) [...7 remote chains...] -- 1:04:33

17450000 -- (-7582.038) [...7 remote chains...] -- 1:04:30

Average standard deviation of split frequencies: 0.007022

17460000 -- (-7575.872) [...7 remote chains...] -- 1:04:26

17470000 -- (-7543.892) [...7 remote chains...] -- 1:04:23

17480000 -- (-7552.231) [...7 remote chains...] -- 1:04:20

17490000 -- (-7552.338) [...7 remote chains...] -- 1:04:17

17500000 -- (-7551.343) [...7 remote chains...] -- 1:04:14

Average standard deviation of split frequencies: 0.007166

17510000 -- (-7551.288) [...7 remote chains...] -- 1:04:11

17520000 -- (-7556.667) [...7 remote chains...] -- 1:04:07

17530000 -- (-7550.967) [...7 remote chains...] -- 1:04:04

17540000 -- (-7581.229) [...7 remote chains...] -- 1:04:01

17550000 -- (-7562.784) [...7 remote chains...] -- 1:03:58

Average standard deviation of split frequencies: 0.007226

17560000 -- (-7553.586) [...7 remote chains...] -- 1:03:55

17570000 -- (-7593.920) [...7 remote chains...] -- 1:03:52

17580000 -- (-7562.722) [...7 remote chains...] -- 1:03:49

17590000 -- (-7573.371) [...7 remote chains...] -- 1:03:46

17600000 -- (-7560.537) [...7 remote chains...] -- 1:03:42

Average standard deviation of split frequencies: 0.007254

17610000 -- (-7556.857) [...7 remote chains...] -- 1:03:39

17620000 -- (-7570.940) [...7 remote chains...] -- 1:03:36

17630000 -- (-7583.360) [...7 remote chains...] -- 1:03:33

17640000 -- (-7551.193) [...7 remote chains...] -- 1:03:30

17650000 -- (-7542.526) [...7 remote chains...] -- 1:03:27

Average standard deviation of split frequencies: 0.007381

17660000 -- (-7580.047) [...7 remote chains...] -- 1:03:24

17670000 -- (-7568.109) [...7 remote chains...] -- 1:03:20

17680000 -- [-7559.742] [...7 remote chains...] -- 1:03:17

17690000 -- (-7546.858) [...7 remote chains...] -- 1:03:14

17700000 -- (-7564.493) [...7 remote chains...] -- 1:03:11

Average standard deviation of split frequencies: 0.007554

17710000 -- (-7549.505) [...7 remote chains...] -- 1:03:08

17720000 -- [-7561.743] [...7 remote chains...] -- 1:03:05

17730000 -- [-7540.520] [...7 remote chains...] -- 1:03:02

17740000 -- (-7536.516) [...7 remote chains...] -- 1:02:58

17750000 -- (-7537.033) [...7 remote chains...] -- 1:02:55

Average standard deviation of split frequencies: 0.007629

17760000 -- (-7552.779) [...7 remote chains...] -- 1:02:52

17770000 -- (-7538.847) [...7 remote chains...] -- 1:02:49

17780000 -- (-7575.449) [...7 remote chains...] -- 1:02:46

17790000 -- (-7556.529) [...7 remote chains...] -- 1:02:43

17800000 -- (-7556.923) [...7 remote chains...] -- 1:02:40

Average standard deviation of split frequencies: 0.007618

17810000 -- (-7561.480) [...7 remote chains...] -- 1:02:36

17820000 -- (-7546.072) [...7 remote chains...] -- 1:02:34

17830000 -- (-7529.713) [...7 remote chains...] -- 1:02:31

17840000 -- (-7541.115) [...7 remote chains...] -- 1:02:28

17850000 -- [-7524.285] [...7 remote chains...] -- 1:02:25

Average standard deviation of split frequencies: 0.007546

17860000 -- (-7546.790) [...7 remote chains...] -- 1:02:21

17870000 -- (-7553.367) [...7 remote chains...] -- 1:02:18

17880000 -- (-7546.707) [...7 remote chains...] -- 1:02:15

17890000 -- (-7568.906) [...7 remote chains...] -- 1:02:12

17900000 -- (-7579.145) [...7 remote chains...] -- 1:02:09

Average standard deviation of split frequencies: 0.007365

17910000 -- (-7553.238) [...7 remote chains...] -- 1:02:06

17920000 -- (-7538.465) [...7 remote chains...] -- 1:02:03

17930000 -- (-7555.192) [...7 remote chains...] -- 1:01:59

17940000 -- [-7566.032] [...7 remote chains...] -- 1:01:56

17950000 -- (-7575.826) [...7 remote chains...] -- 1:01:53

Average standard deviation of split frequencies: 0.007153

17960000 -- (-7579.599) [...7 remote chains...] -- 1:01:50

17970000 -- (-7571.969) [...7 remote chains...] -- 1:01:47

17980000 -- (-7539.524) [...7 remote chains...] -- 1:01:44

17990000 -- (-7566.597) [...7 remote chains...] -- 1:01:41

18000000 -- (-7551.494) [...7 remote chains...] -- 1:01:38

Average standard deviation of split frequencies: 0.007216

18010000 -- (-7555.211) [...7 remote chains...] -- 1:01:34

18020000 -- (-7564.689) [...7 remote chains...] -- 1:01:31

18030000 -- (-7549.565) [...7 remote chains...] -- 1:01:28

18040000 -- (-7572.368) [...7 remote chains...] -- 1:01:25

18050000 -- (-7566.981) [...7 remote chains...] -- 1:01:22

Average standard deviation of split frequencies: 0.007255

18060000 -- (-7557.889) [...7 remote chains...] -- 1:01:19

18070000 -- (-7569.310) [...7 remote chains...] -- 1:01:16

18080000 -- (-7571.229) [...7 remote chains...] -- 1:01:12

18090000 -- (-7545.212) [...7 remote chains...] -- 1:01:09

18100000 -- (-7561.080) [...7 remote chains...] -- 1:01:06

Average standard deviation of split frequencies: 0.007091

18110000 -- [-7552.787] [...7 remote chains...] -- 1:01:03

18120000 -- [-7544.671] [...7 remote chains...] -- 1:01:00

18130000 -- [-7523.162] [...7 remote chains...] -- 1:00:57

18140000 -- (-7542.445) [...7 remote chains...] -- 1:00:54

18150000 -- (-7565.444) [...7 remote chains...] -- 1:00:50

Average standard deviation of split frequencies: 0.006864

18160000 -- (-7553.473) [...7 remote chains...] -- 1:00:47

18170000 -- (-7562.289) [...7 remote chains...] -- 1:00:44

18180000 -- (-7551.725) [...7 remote chains...] -- 1:00:41

18190000 -- (-7550.324) [...7 remote chains...] -- 1:00:38

18200000 -- (-7547.008) [...7 remote chains...] -- 1:00:35

Average standard deviation of split frequencies: 0.006905

18210000 -- (-7553.574) [...7 remote chains...] -- 1:00:32

18220000 -- (-7573.325) [...7 remote chains...] -- 1:00:29

18230000 -- (-7554.694) [...7 remote chains...] -- 1:00:25

18240000 -- (-7555.826) [...7 remote chains...] -- 1:00:22

18250000 -- [-7540.929] [...7 remote chains...] -- 1:00:19

Average standard deviation of split frequencies: 0.006928

18260000 -- [-7556.011] [...7 remote chains...] -- 1:00:16

18270000 -- (-7561.715) [...7 remote chains...] -- 1:00:13

18280000 -- [-7522.535] [...7 remote chains...] -- 1:00:10

18290000 -- (-7551.410) [...7 remote chains...] -- 1:00:07

18300000 -- (-7557.995) [...7 remote chains...] -- 1:00:03

Average standard deviation of split frequencies: 0.007011

18310000 -- (-7583.174) [...7 remote chains...] -- 1:00:00

18320000 -- (-7567.727) [...7 remote chains...] -- 0:59:57

18330000 -- (-7560.059) [...7 remote chains...] -- 0:59:54

18340000 -- (-7552.020) [...7 remote chains...] -- 0:59:51

18350000 -- (-7552.971) [...7 remote chains...] -- 0:59:48

Average standard deviation of split frequencies: 0.007011

18360000 -- [-7555.176] [...7 remote chains...] -- 0:59:45

18370000 -- [-7544.686] [...7 remote chains...] -- 0:59:42

18380000 -- [-7553.008] [...7 remote chains...] -- 0:59:39

18390000 -- [-7537.031] [...7 remote chains...] -- 0:59:36

18400000 -- [-7542.497] [...7 remote chains...] -- 0:59:32

Average standard deviation of split frequencies: 0.007011

18410000 -- [-7549.021] [...7 remote chains...] -- 0:59:29

18420000 -- [-7539.660] [...7 remote chains...] -- 0:59:26

18430000 -- [-7532.201] [...7 remote chains...] -- 0:59:23

18440000 -- [-7536.977] [...7 remote chains...] -- 0:59:20

18450000 -- [-7555.909] [...7 remote chains...] -- 0:59:17

Average standard deviation of split frequencies: 0.007051

18460000 -- [-7563.012] [...7 remote chains...] -- 0:59:13

18470000 -- (-7551.136) [...7 remote chains...] -- 0:59:10

18480000 -- (-7550.458) [...7 remote chains...] -- 0:59:07

18490000 -- [-7536.101] [...7 remote chains...] -- 0:59:04

18500000 -- [-7541.998] [...7 remote chains...] -- 0:59:01

Average standard deviation of split frequencies: 0.007032

18510000 -- [-7536.017] [...7 remote chains...] -- 0:58:58

18520000 -- [-7543.717] [...7 remote chains...] -- 0:58:55

18530000 -- (-7556.801) [...7 remote chains...] -- 0:58:52

18540000 -- (-7562.346) [...7 remote chains...] -- 0:58:49

18550000 -- (-7550.150) [...7 remote chains...] -- 0:58:46

Average standard deviation of split frequencies: 0.007006

18560000 -- (-7538.950) [...7 remote chains...] -- 0:58:43

18570000 -- (-7564.488) [...7 remote chains...] -- 0:58:40

18580000 -- (-7548.253) [...7 remote chains...] -- 0:58:36

18590000 -- (-7559.359) [...7 remote chains...] -- 0:58:33

18600000 -- (-7545.719) [...7 remote chains...] -- 0:58:30

Average standard deviation of split frequencies: 0.007030

18610000 -- (-7579.711) [...7 remote chains...] -- 0:58:27

18620000 -- (-7556.083) [...7 remote chains...] -- 0:58:24

18630000 -- (-7569.519) [...7 remote chains...] -- 0:58:21

18640000 -- (-7531.458) [...7 remote chains...] -- 0:58:18

18650000 -- (-7564.178) [...7 remote chains...] -- 0:58:15

Average standard deviation of split frequencies: 0.007162

18660000 -- (-7556.900) [...7 remote chains...] -- 0:58:11

18670000 -- (-7545.314) [...7 remote chains...] -- 0:58:08

18680000 -- (-7565.386) [...7 remote chains...] -- 0:58:05

18690000 -- (-7546.808) [...7 remote chains...] -- 0:58:02

18700000 -- (-7550.777) [...7 remote chains...] -- 0:57:59

Average standard deviation of split frequencies: 0.007165

18710000 -- (-7550.009) [...7 remote chains...] -- 0:57:56

18720000 -- [-7548.953] [...7 remote chains...] -- 0:57:53

18730000 -- [-7540.216] [...7 remote chains...] -- 0:57:50

18740000 -- (-7552.328) [...7 remote chains...] -- 0:57:46

18750000 -- [-7549.796] [...7 remote chains...] -- 0:57:43

Average standard deviation of split frequencies: 0.007160

18760000 -- (-7534.996) [...7 remote chains...] -- 0:57:41

18770000 -- (-7547.391) [...7 remote chains...] -- 0:57:38

18780000 -- (-7557.582) [...7 remote chains...] -- 0:57:35

18790000 -- (-7558.990) [...7 remote chains...] -- 0:57:31

18800000 -- [-7552.625] [...7 remote chains...] -- 0:57:28

Average standard deviation of split frequencies: 0.007134

18810000 -- (-7568.114) [...7 remote chains...] -- 0:57:25

18820000 -- [-7549.589] [...7 remote chains...] -- 0:57:22

18830000 -- [-7558.924] [...7 remote chains...] -- 0:57:19

18840000 -- (-7547.307) [...7 remote chains...] -- 0:57:16

18850000 -- [-7544.846] [...7 remote chains...] -- 0:57:13

Average standard deviation of split frequencies: 0.007041

18860000 -- [-7551.202] [...7 remote chains...] -- 0:57:10

18870000 -- (-7559.481) [...7 remote chains...] -- 0:57:06

18880000 -- [-7556.356] [...7 remote chains...] -- 0:57:03

18890000 -- [-7540.664] [...7 remote chains...] -- 0:57:00

18900000 -- (-7550.623) [...7 remote chains...] -- 0:56:57

Average standard deviation of split frequencies: 0.007045

18910000 -- (-7527.936) [...7 remote chains...] -- 0:56:54

18920000 -- [-7556.641] [...7 remote chains...] -- 0:56:51

18930000 -- (-7563.287) [...7 remote chains...] -- 0:56:48

18940000 -- (-7556.845) [...7 remote chains...] -- 0:56:45

18950000 -- (-7565.809) [...7 remote chains...] -- 0:56:41

Average standard deviation of split frequencies: 0.007122

18960000 -- (-7534.407) [...7 remote chains...] -- 0:56:38

18970000 -- (-7563.134) [...7 remote chains...] -- 0:56:35

18980000 -- [-7528.468] [...7 remote chains...] -- 0:56:32

18990000 -- (-7548.623) [...7 remote chains...] -- 0:56:29

19000000 -- [-7540.174] [...7 remote chains...] -- 0:56:26

Average standard deviation of split frequencies: 0.007074

19010000 -- [-7552.229] [...7 remote chains...] -- 0:56:23

19020000 -- [-7558.209] [...7 remote chains...] -- 0:56:20

19030000 -- [-7537.266] [...7 remote chains...] -- 0:56:16

19040000 -- (-7535.985) [...7 remote chains...] -- 0:56:13

19050000 -- [-7550.622] [...7 remote chains...] -- 0:56:11

Average standard deviation of split frequencies: 0.007010

19060000 -- [-7550.035] [...7 remote chains...] -- 0:56:08

19070000 -- [-7545.588] [...7 remote chains...] -- 0:56:04

19080000 -- [-7557.080] [...7 remote chains...] -- 0:56:01

19090000 -- [-7551.509] [...7 remote chains...] -- 0:55:58

19100000 -- [-7539.577] [...7 remote chains...] -- 0:55:55

Average standard deviation of split frequencies: 0.007268

19110000 -- [-7534.634] [...7 remote chains...] -- 0:55:52

19120000 -- [-7545.113] [...7 remote chains...] -- 0:55:49

19130000 -- [-7570.099] [...7 remote chains...] -- 0:55:46

19140000 -- [-7550.981] [...7 remote chains...] -- 0:55:43

19150000 -- (-7573.383) [...7 remote chains...] -- 0:55:39

Average standard deviation of split frequencies: 0.007263

19160000 -- (-7549.996) [...7 remote chains...] -- 0:55:36

19170000 -- [-7546.680] [...7 remote chains...] -- 0:55:33

19180000 -- (-7542.595) [...7 remote chains...] -- 0:55:30

19190000 -- (-7553.952) [...7 remote chains...] -- 0:55:27

19200000 -- (-7572.051) [...7 remote chains...] -- 0:55:24

Average standard deviation of split frequencies: 0.007373

19210000 -- (-7536.717) [...7 remote chains...] -- 0:55:21

19220000 -- (-7541.141) [...7 remote chains...] -- 0:55:18

19230000 -- (-7561.723) [...7 remote chains...] -- 0:55:15

19240000 -- (-7541.184) [...7 remote chains...] -- 0:55:11

19250000 -- (-7576.467) [...7 remote chains...] -- 0:55:08

Average standard deviation of split frequencies: 0.007542

19260000 -- (-7565.788) [...7 remote chains...] -- 0:55:05

19270000 -- (-7570.223) [...7 remote chains...] -- 0:55:02

19280000 -- (-7551.993) [...7 remote chains...] -- 0:54:59

19290000 -- [-7548.015] [...7 remote chains...] -- 0:54:56

19300000 -- (-7567.809) [...7 remote chains...] -- 0:54:53

Average standard deviation of split frequencies: 0.007596

19310000 -- [-7537.514] [...7 remote chains...] -- 0:54:50

19320000 -- [-7544.942] [...7 remote chains...] -- 0:54:46

19330000 -- (-7544.898) [...7 remote chains...] -- 0:54:43

19340000 -- (-7578.306) [...7 remote chains...] -- 0:54:40

19350000 -- (-7542.781) [...7 remote chains...] -- 0:54:37

Average standard deviation of split frequencies: 0.007549

19360000 -- (-7542.867) [...7 remote chains...] -- 0:54:34

19370000 -- [-7543.249] [...7 remote chains...] -- 0:54:31

19380000 -- [-7557.318] [...7 remote chains...] -- 0:54:28

19390000 -- (-7544.359) [...7 remote chains...] -- 0:54:25

19400000 -- (-7572.958) [...7 remote chains...] -- 0:54:21

Average standard deviation of split frequencies: 0.007512

19410000 -- [-7542.357] [...7 remote chains...] -- 0:54:18

19420000 -- (-7543.106) [...7 remote chains...] -- 0:54:15

19430000 -- [-7539.632] [...7 remote chains...] -- 0:54:12

19440000 -- [-7551.751] [...7 remote chains...] -- 0:54:09

19450000 -- (-7561.151) [...7 remote chains...] -- 0:54:06

Average standard deviation of split frequencies: 0.007417

19460000 -- [-7554.962] [...7 remote chains...] -- 0:54:03

19470000 -- [-7550.021] [...7 remote chains...] -- 0:54:00

19480000 -- [-7556.309] [...7 remote chains...] -- 0:53:57

19490000 -- [-7537.106] [...7 remote chains...] -- 0:53:54

19500000 -- [-7520.729] [...7 remote chains...] -- 0:53:51

Average standard deviation of split frequencies: 0.007284

19510000 -- (-7548.505) [...7 remote chains...] -- 0:53:48

19520000 -- (-7583.136) [...7 remote chains...] -- 0:53:45

19530000 -- (-7561.273) [...7 remote chains...] -- 0:53:41

19540000 -- (-7551.918) [...7 remote chains...] -- 0:53:38

19550000 -- (-7550.782) [...7 remote chains...] -- 0:53:35

Average standard deviation of split frequencies: 0.007257

19560000 -- (-7532.083) [...7 remote chains...] -- 0:53:32

19570000 -- [-7554.673] [...7 remote chains...] -- 0:53:29

19580000 -- [-7565.882] [...7 remote chains...] -- 0:53:26

19590000 -- [-7556.735] [...7 remote chains...] -- 0:53:23

19600000 -- (-7540.312) [...7 remote chains...] -- 0:53:20

Average standard deviation of split frequencies: 0.007213

19610000 -- (-7545.350) [...7 remote chains...] -- 0:53:17

19620000 -- (-7545.211) [...7 remote chains...] -- 0:53:13

19630000 -- (-7556.977) [...7 remote chains...] -- 0:53:10

19640000 -- (-7556.343) [...7 remote chains...] -- 0:53:07

19650000 -- (-7562.919) [...7 remote chains...] -- 0:53:04

Average standard deviation of split frequencies: 0.007297

19660000 -- (-7545.546) [...7 remote chains...] -- 0:53:01

19670000 -- (-7550.299) [...7 remote chains...] -- 0:52:58

19680000 -- (-7547.506) [...7 remote chains...] -- 0:52:55

19690000 -- (-7566.697) [...7 remote chains...] -- 0:52:52

19700000 -- (-7566.920) [...7 remote chains...] -- 0:52:48

Average standard deviation of split frequencies: 0.007453

19710000 -- (-7565.086) [...7 remote chains...] -- 0:52:45

19720000 -- (-7558.578) [...7 remote chains...] -- 0:52:42

19730000 -- (-7550.279) [...7 remote chains...] -- 0:52:39

19740000 -- (-7569.182) [...7 remote chains...] -- 0:52:36

19750000 -- (-7568.824) [...7 remote chains...] -- 0:52:33

Average standard deviation of split frequencies: 0.007480

19760000 -- (-7564.069) [...7 remote chains...] -- 0:52:30

19770000 -- (-7578.878) [...7 remote chains...] -- 0:52:27

19780000 -- (-7577.802) [...7 remote chains...] -- 0:52:24

19790000 -- (-7565.708) [...7 remote chains...] -- 0:52:20

19800000 -- (-7543.544) [...7 remote chains...] -- 0:52:17

Average standard deviation of split frequencies: 0.007394

19810000 -- (-7551.874) [...7 remote chains...] -- 0:52:14

19820000 -- [-7546.103] [...7 remote chains...] -- 0:52:11

19830000 -- (-7567.967) [...7 remote chains...] -- 0:52:08

19840000 -- [-7544.611] [...7 remote chains...] -- 0:52:05

19850000 -- (-7547.987) [...7 remote chains...] -- 0:52:02

Average standard deviation of split frequencies: 0.007409

19860000 -- [-7549.453] [...7 remote chains...] -- 0:51:59

19870000 -- [-7546.389] [...7 remote chains...] -- 0:51:55

19880000 -- [-7542.138] [...7 remote chains...] -- 0:51:52

19890000 -- (-7546.098) [...7 remote chains...] -- 0:51:49

19900000 -- (-7556.494) [...7 remote chains...] -- 0:51:46

Average standard deviation of split frequencies: 0.007361

19910000 -- (-7546.043) [...7 remote chains...] -- 0:51:44

19920000 -- [-7558.399] [...7 remote chains...] -- 0:51:40

19930000 -- [-7543.943] [...7 remote chains...] -- 0:51:37

19940000 -- (-7549.038) [...7 remote chains...] -- 0:51:34

19950000 -- [-7552.931] [...7 remote chains...] -- 0:51:31

Average standard deviation of split frequencies: 0.007311

19960000 -- [-7560.270] [...7 remote chains...] -- 0:51:28

19970000 -- [-7552.805] [...7 remote chains...] -- 0:51:25

19980000 -- [-7535.914] [...7 remote chains...] -- 0:51:22

19990000 -- [-7551.572] [...7 remote chains...] -- 0:51:19

20000000 -- [-7561.639] [...7 remote chains...] -- 0:51:16

Average standard deviation of split frequencies: 0.007277

20010000 -- [-7563.018] [...7 remote chains...] -- 0:51:12

20020000 -- [-7544.916] [...7 remote chains...] -- 0:51:09

20030000 -- [-7564.984] [...7 remote chains...] -- 0:51:06

20040000 -- [-7572.519] [...7 remote chains...] -- 0:51:03

20050000 -- [-7563.827] [...7 remote chains...] -- 0:51:00

Average standard deviation of split frequencies: 0.007342

20060000 -- [-7567.210] [...7 remote chains...] -- 0:50:57

20070000 -- [-7562.884] [...7 remote chains...] -- 0:50:54

20080000 -- [-7563.903] [...7 remote chains...] -- 0:50:51

20090000 -- [-7562.964] [...7 remote chains...] -- 0:50:47

20100000 -- [-7541.406] [...7 remote chains...] -- 0:50:44

Average standard deviation of split frequencies: 0.007271

20110000 -- [-7542.905] [...7 remote chains...] -- 0:50:41

20120000 -- [-7544.532] [...7 remote chains...] -- 0:50:38

20130000 -- [-7557.649] [...7 remote chains...] -- 0:50:35

20140000 -- [-7544.689] [...7 remote chains...] -- 0:50:32

20150000 -- [-7550.586] [...7 remote chains...] -- 0:50:29

Average standard deviation of split frequencies: 0.007312

20160000 -- [-7566.326] [...7 remote chains...] -- 0:50:26

20170000 -- [-7549.635] [...7 remote chains...] -- 0:50:23

20180000 -- [-7550.010] [...7 remote chains...] -- 0:50:19

20190000 -- [-7550.644] [...7 remote chains...] -- 0:50:16

20200000 -- [-7552.720] [...7 remote chains...] -- 0:50:13

Average standard deviation of split frequencies: 0.007436

20210000 -- (-7549.681) [...7 remote chains...] -- 0:50:10

20220000 -- [-7555.182] [...7 remote chains...] -- 0:50:07

20230000 -- [-7562.770] [...7 remote chains...] -- 0:50:04

20240000 -- [-7545.746] [...7 remote chains...] -- 0:50:01

20250000 -- [-7553.183] [...7 remote chains...] -- 0:49:58

Average standard deviation of split frequencies: 0.007429

20260000 -- (-7543.088) [...7 remote chains...] -- 0:49:55

20270000 -- (-7560.804) [...7 remote chains...] -- 0:49:51

20280000 -- (-7541.981) [...7 remote chains...] -- 0:49:48

20290000 -- (-7559.315) [...7 remote chains...] -- 0:49:46

20300000 -- (-7552.034) [...7 remote chains...] -- 0:49:43

Average standard deviation of split frequencies: 0.007301

20310000 -- (-7554.661) [...7 remote chains...] -- 0:49:39

20320000 -- (-7539.549) [...7 remote chains...] -- 0:49:36

20330000 -- (-7537.925) [...7 remote chains...] -- 0:49:33

20340000 -- (-7554.810) [...7 remote chains...] -- 0:49:30

20350000 -- (-7566.896) [...7 remote chains...] -- 0:49:27

Average standard deviation of split frequencies: 0.007344

20360000 -- (-7544.290) [...7 remote chains...] -- 0:49:24

20370000 -- (-7560.268) [...7 remote chains...] -- 0:49:21

20380000 -- (-7563.925) [...7 remote chains...] -- 0:49:18

20390000 -- (-7570.235) [...7 remote chains...] -- 0:49:15

20400000 -- (-7549.171) [...7 remote chains...] -- 0:49:12

Average standard deviation of split frequencies: 0.007408

20410000 -- (-7564.345) [...7 remote chains...] -- 0:49:08

20420000 -- (-7568.872) [...7 remote chains...] -- 0:49:05

20430000 -- (-7572.803) [...7 remote chains...] -- 0:49:02

20440000 -- (-7570.140) [...7 remote chains...] -- 0:48:59

20450000 -- (-7591.022) [...7 remote chains...] -- 0:48:56

Average standard deviation of split frequencies: 0.007449

20460000 -- (-7570.653) [...7 remote chains...] -- 0:48:53

20470000 -- (-7591.233) [...7 remote chains...] -- 0:48:50

20480000 -- (-7553.779) [...7 remote chains...] -- 0:48:47

20490000 -- (-7559.417) [...7 remote chains...] -- 0:48:44

20500000 -- (-7576.301) [...7 remote chains...] -- 0:48:41

Average standard deviation of split frequencies: 0.007513

20510000 -- (-7559.178) [...7 remote chains...] -- 0:48:38

20520000 -- (-7570.933) [...7 remote chains...] -- 0:48:35

20530000 -- (-7582.819) [...7 remote chains...] -- 0:48:32

20540000 -- (-7562.148) [...7 remote chains...] -- 0:48:28

20550000 -- (-7561.733) [...7 remote chains...] -- 0:48:25

Average standard deviation of split frequencies: 0.007477

20560000 -- (-7573.337) [...7 remote chains...] -- 0:48:22

20570000 -- (-7579.240) [...7 remote chains...] -- 0:48:19

20580000 -- (-7580.124) [...7 remote chains...] -- 0:48:16

20590000 -- (-7562.720) [...7 remote chains...] -- 0:48:13

20600000 -- (-7558.404) [...7 remote chains...] -- 0:48:10

Average standard deviation of split frequencies: 0.007489

20610000 -- (-7575.511) [...7 remote chains...] -- 0:48:07

20620000 -- (-7572.356) [...7 remote chains...] -- 0:48:04

20630000 -- (-7570.845) [...7 remote chains...] -- 0:48:01

20640000 -- (-7567.531) [...7 remote chains...] -- 0:47:58

20650000 -- (-7561.021) [...7 remote chains...] -- 0:47:55

Average standard deviation of split frequencies: 0.007334

20660000 -- (-7575.378) [...7 remote chains...] -- 0:47:52

20670000 -- (-7548.745) [...7 remote chains...] -- 0:47:48

20680000 -- (-7560.057) [...7 remote chains...] -- 0:47:45

20690000 -- (-7556.209) [...7 remote chains...] -- 0:47:42

20700000 -- (-7562.424) [...7 remote chains...] -- 0:47:39

Average standard deviation of split frequencies: 0.007299

20710000 -- (-7550.791) [...7 remote chains...] -- 0:47:36

20720000 -- (-7559.242) [...7 remote chains...] -- 0:47:33

20730000 -- (-7573.666) [...7 remote chains...] -- 0:47:30

20740000 -- (-7559.065) [...7 remote chains...] -- 0:47:27

20750000 -- (-7553.984) [...7 remote chains...] -- 0:47:24

Average standard deviation of split frequencies: 0.007329

20760000 -- (-7549.359) [...7 remote chains...] -- 0:47:20

20770000 -- (-7567.011) [...7 remote chains...] -- 0:47:17

20780000 -- (-7551.986) [...7 remote chains...] -- 0:47:14

20790000 -- (-7557.688) [...7 remote chains...] -- 0:47:11

20800000 -- (-7574.977) [...7 remote chains...] -- 0:47:08

Average standard deviation of split frequencies: 0.007289

20810000 -- (-7561.977) [...7 remote chains...] -- 0:47:05

20820000 -- (-7548.979) [...7 remote chains...] -- 0:47:02

20830000 -- (-7541.475) [...7 remote chains...] -- 0:46:59

20840000 -- (-7568.280) [...7 remote chains...] -- 0:46:56

20850000 -- (-7555.131) [...7 remote chains...] -- 0:46:53

Average standard deviation of split frequencies: 0.007171

20860000 -- (-7579.369) [...7 remote chains...] -- 0:46:49

20870000 -- (-7560.811) [...7 remote chains...] -- 0:46:46

20880000 -- (-7569.513) [...7 remote chains...] -- 0:46:43

20890000 -- (-7563.080) [...7 remote chains...] -- 0:46:40

20900000 -- (-7547.883) [...7 remote chains...] -- 0:46:37

Average standard deviation of split frequencies: 0.007082

20910000 -- (-7557.666) [...7 remote chains...] -- 0:46:34

20920000 -- (-7570.417) [...7 remote chains...] -- 0:46:31

20930000 -- (-7565.315) [...7 remote chains...] -- 0:46:28

20940000 -- (-7529.418) [...7 remote chains...] -- 0:46:25

20950000 -- (-7552.406) [...7 remote chains...] -- 0:46:22

Average standard deviation of split frequencies: 0.007049

20960000 -- (-7568.977) [...7 remote chains...] -- 0:46:19

20970000 -- (-7557.992) [...7 remote chains...] -- 0:46:16

20980000 -- (-7573.239) [...7 remote chains...] -- 0:46:13

20990000 -- (-7552.730) [...7 remote chains...] -- 0:46:09

21000000 -- (-7558.913) [...7 remote chains...] -- 0:46:06

Average standard deviation of split frequencies: 0.007063

21010000 -- (-7552.254) [...7 remote chains...] -- 0:46:03

21020000 -- (-7549.028) [...7 remote chains...] -- 0:46:00

21030000 -- (-7568.799) [...7 remote chains...] -- 0:45:57

21040000 -- (-7569.420) [...7 remote chains...] -- 0:45:54

21050000 -- (-7553.233) [...7 remote chains...] -- 0:45:51

Average standard deviation of split frequencies: 0.007056

21060000 -- (-7556.580) [...7 remote chains...] -- 0:45:48

21070000 -- (-7557.360) [...7 remote chains...] -- 0:45:45

21080000 -- (-7552.030) [...7 remote chains...] -- 0:45:42

21090000 -- (-7528.015) [...7 remote chains...] -- 0:45:38

21100000 -- (-7547.330) [...7 remote chains...] -- 0:45:35

Average standard deviation of split frequencies: 0.007037

21110000 -- (-7537.835) [...7 remote chains...] -- 0:45:32

21120000 -- (-7551.739) [...7 remote chains...] -- 0:45:29

21130000 -- (-7572.925) [...7 remote chains...] -- 0:45:26

21140000 -- (-7566.085) [...7 remote chains...] -- 0:45:23

21150000 -- (-7587.020) [...7 remote chains...] -- 0:45:20

Average standard deviation of split frequencies: 0.006961

21160000 -- (-7577.627) [...7 remote chains...] -- 0:45:17

21170000 -- [-7546.352] [...7 remote chains...] -- 0:45:14

21180000 -- (-7559.457) [...7 remote chains...] -- 0:45:10

21190000 -- (-7562.142) [...7 remote chains...] -- 0:45:07

21200000 -- (-7554.321) [...7 remote chains...] -- 0:45:04

Average standard deviation of split frequencies: 0.006881

21210000 -- (-7563.516) [...7 remote chains...] -- 0:45:02

21220000 -- (-7554.770) [...7 remote chains...] -- 0:44:58

21230000 -- (-7548.658) [...7 remote chains...] -- 0:44:55

21240000 -- (-7562.411) [...7 remote chains...] -- 0:44:52

21250000 -- (-7582.220) [...7 remote chains...] -- 0:44:49

Average standard deviation of split frequencies: 0.006812

21260000 -- (-7552.077) [...7 remote chains...] -- 0:44:46

21270000 -- (-7572.729) [...7 remote chains...] -- 0:44:43

21280000 -- [-7553.105] [...7 remote chains...] -- 0:44:40

21290000 -- (-7539.166) [...7 remote chains...] -- 0:44:37

21300000 -- (-7547.378) [...7 remote chains...] -- 0:44:34

Average standard deviation of split frequencies: 0.006781

21310000 -- [-7532.849] [...7 remote chains...] -- 0:44:31

21320000 -- [-7549.582] [...7 remote chains...] -- 0:44:27

21330000 -- (-7543.402) [...7 remote chains...] -- 0:44:24

21340000 -- [-7551.631] [...7 remote chains...] -- 0:44:21

21350000 -- [-7558.204] [...7 remote chains...] -- 0:44:18

Average standard deviation of split frequencies: 0.006751

21360000 -- (-7559.468) [...7 remote chains...] -- 0:44:15

21370000 -- (-7556.388) [...7 remote chains...] -- 0:44:12

21380000 -- (-7545.753) [...7 remote chains...] -- 0:44:09

21390000 -- (-7546.663) [...7 remote chains...] -- 0:44:06

21400000 -- [-7538.448] [...7 remote chains...] -- 0:44:03

Average standard deviation of split frequencies: 0.006677

21410000 -- [-7550.954] [...7 remote chains...] -- 0:43:59

21420000 -- [-7553.516] [...7 remote chains...] -- 0:43:56

21430000 -- (-7540.143) [...7 remote chains...] -- 0:43:54

21440000 -- [-7549.976] [...7 remote chains...] -- 0:43:51

21450000 -- [-7545.337] [...7 remote chains...] -- 0:43:47

Average standard deviation of split frequencies: 0.006470

21460000 -- (-7540.071) [...7 remote chains...] -- 0:43:44

21470000 -- (-7557.497) [...7 remote chains...] -- 0:43:41

21480000 -- (-7556.726) [...7 remote chains...] -- 0:43:38

21490000 -- (-7556.922) [...7 remote chains...] -- 0:43:35

21500000 -- (-7555.452) [...7 remote chains...] -- 0:43:32

Average standard deviation of split frequencies: 0.006475

21510000 -- (-7534.110) [...7 remote chains...] -- 0:43:29

21520000 -- (-7528.528) [...7 remote chains...] -- 0:43:26

21530000 -- (-7559.604) [...7 remote chains...] -- 0:43:23

21540000 -- (-7545.577) [...7 remote chains...] -- 0:43:20

21550000 -- (-7542.727) [...7 remote chains...] -- 0:43:16

Average standard deviation of split frequencies: 0.006595

21560000 -- (-7568.067) [...7 remote chains...] -- 0:43:13

21570000 -- (-7566.714) [...7 remote chains...] -- 0:43:10

21580000 -- [-7544.948] [...7 remote chains...] -- 0:43:07

21590000 -- (-7535.395) [...7 remote chains...] -- 0:43:04

21600000 -- [-7541.128] [...7 remote chains...] -- 0:43:01

Average standard deviation of split frequencies: 0.006592

21610000 -- [-7546.353] [...7 remote chains...] -- 0:42:58

21620000 -- (-7559.826) [...7 remote chains...] -- 0:42:55

21630000 -- [-7549.422] [...7 remote chains...] -- 0:42:52

21640000 -- (-7546.858) [...7 remote chains...] -- 0:42:49

21650000 -- (-7575.605) [...7 remote chains...] -- 0:42:45

Average standard deviation of split frequencies: 0.006461

21660000 -- (-7558.186) [...7 remote chains...] -- 0:42:42

21670000 -- (-7574.875) [...7 remote chains...] -- 0:42:39

21680000 -- (-7562.756) [...7 remote chains...] -- 0:42:36

21690000 -- (-7565.794) [...7 remote chains...] -- 0:42:33

21700000 -- (-7561.152) [...7 remote chains...] -- 0:42:30

Average standard deviation of split frequencies: 0.006490

21710000 -- (-7537.883) [...7 remote chains...] -- 0:42:27

21720000 -- (-7564.420) [...7 remote chains...] -- 0:42:24

21730000 -- (-7569.505) [...7 remote chains...] -- 0:42:21

21740000 -- (-7551.561) [...7 remote chains...] -- 0:42:18

21750000 -- (-7543.313) [...7 remote chains...] -- 0:42:14

Average standard deviation of split frequencies: 0.006530

21760000 -- (-7555.520) [...7 remote chains...] -- 0:42:11

21770000 -- (-7576.731) [...7 remote chains...] -- 0:42:08

21780000 -- (-7550.179) [...7 remote chains...] -- 0:42:05

21790000 -- (-7535.379) [...7 remote chains...] -- 0:42:02

21800000 -- (-7558.514) [...7 remote chains...] -- 0:41:59

Average standard deviation of split frequencies: 0.006570

21810000 -- (-7545.333) [...7 remote chains...] -- 0:41:56

21820000 -- (-7534.059) [...7 remote chains...] -- 0:41:53

21830000 -- (-7566.323) [...7 remote chains...] -- 0:41:50

21840000 -- (-7536.249) [...7 remote chains...] -- 0:41:47

21850000 -- (-7578.459) [...7 remote chains...] -- 0:41:43

Average standard deviation of split frequencies: 0.006513

21860000 -- (-7546.244) [...7 remote chains...] -- 0:41:40

21870000 -- (-7555.559) [...7 remote chains...] -- 0:41:38

21880000 -- (-7534.560) [...7 remote chains...] -- 0:41:35

21890000 -- (-7551.694) [...7 remote chains...] -- 0:41:31

21900000 -- (-7550.432) [...7 remote chains...] -- 0:41:28

Average standard deviation of split frequencies: 0.006531

21910000 -- (-7568.668) [...7 remote chains...] -- 0:41:25

21920000 -- (-7559.223) [...7 remote chains...] -- 0:41:22

21930000 -- (-7551.548) [...7 remote chains...] -- 0:41:19

21940000 -- (-7562.081) [...7 remote chains...] -- 0:41:16

21950000 -- (-7544.316) [...7 remote chains...] -- 0:41:13

Average standard deviation of split frequencies: 0.006382

21960000 -- (-7562.634) [...7 remote chains...] -- 0:41:10

21970000 -- (-7554.540) [...7 remote chains...] -- 0:41:07

21980000 -- (-7558.716) [...7 remote chains...] -- 0:41:04

21990000 -- [-7542.130] [...7 remote chains...] -- 0:41:00

22000000 -- (-7554.222) [...7 remote chains...] -- 0:40:57

Average standard deviation of split frequencies: 0.006403

22010000 -- (-7570.942) [...7 remote chains...] -- 0:40:54

22020000 -- [-7537.940] [...7 remote chains...] -- 0:40:51

22030000 -- [-7550.818] [...7 remote chains...] -- 0:40:48

22040000 -- (-7540.989) [...7 remote chains...] -- 0:40:45

22050000 -- (-7575.817) [...7 remote chains...] -- 0:40:42

Average standard deviation of split frequencies: 0.006654

22060000 -- (-7544.866) [...7 remote chains...] -- 0:40:39

22070000 -- (-7553.574) [...7 remote chains...] -- 0:40:36

22080000 -- (-7541.533) [...7 remote chains...] -- 0:40:33

22090000 -- (-7562.865) [...7 remote chains...] -- 0:40:29

22100000 -- [-7555.032] [...7 remote chains...] -- 0:40:26

Average standard deviation of split frequencies: 0.006716

22110000 -- (-7544.089) [...7 remote chains...] -- 0:40:23

22120000 -- (-7558.160) [...7 remote chains...] -- 0:40:20

22130000 -- (-7568.648) [...7 remote chains...] -- 0:40:17

22140000 -- (-7531.584) [...7 remote chains...] -- 0:40:14

22150000 -- (-7542.691) [...7 remote chains...] -- 0:40:11

Average standard deviation of split frequencies: 0.006884

22160000 -- (-7557.974) [...7 remote chains...] -- 0:40:08

22170000 -- (-7577.395) [...7 remote chains...] -- 0:40:05

22180000 -- (-7561.112) [...7 remote chains...] -- 0:40:02

22190000 -- (-7540.581) [...7 remote chains...] -- 0:39:59

22200000 -- (-7542.527) [...7 remote chains...] -- 0:39:56

Average standard deviation of split frequencies: 0.007052

22210000 -- (-7554.416) [...7 remote chains...] -- 0:39:53

22220000 -- (-7528.663) [...7 remote chains...] -- 0:39:50

22230000 -- (-7560.508) [...7 remote chains...] -- 0:39:46

22240000 -- [-7544.317] [...7 remote chains...] -- 0:39:43

22250000 -- [-7545.805] [...7 remote chains...] -- 0:39:40

Average standard deviation of split frequencies: 0.007121

22260000 -- (-7565.988) [...7 remote chains...] -- 0:39:37

22270000 -- [-7557.293] [...7 remote chains...] -- 0:39:34

22280000 -- (-7544.792) [...7 remote chains...] -- 0:39:31

22290000 -- (-7541.614) [...7 remote chains...] -- 0:39:28

22300000 -- (-7542.921) [...7 remote chains...] -- 0:39:25

Average standard deviation of split frequencies: 0.007192

22310000 -- (-7579.890) [...7 remote chains...] -- 0:39:22

22320000 -- (-7556.290) [...7 remote chains...] -- 0:39:19

22330000 -- (-7556.727) [...7 remote chains...] -- 0:39:15

22340000 -- (-7565.934) [...7 remote chains...] -- 0:39:12

22350000 -- (-7570.119) [...7 remote chains...] -- 0:39:09

Average standard deviation of split frequencies: 0.007201

22360000 -- (-7555.197) [...7 remote chains...] -- 0:39:06

22370000 -- (-7560.000) [...7 remote chains...] -- 0:39:03

22380000 -- (-7569.684) [...7 remote chains...] -- 0:39:00

22390000 -- (-7582.505) [...7 remote chains...] -- 0:38:57

22400000 -- (-7553.434) [...7 remote chains...] -- 0:38:54

Average standard deviation of split frequencies: 0.007136

22410000 -- (-7561.813) [...7 remote chains...] -- 0:38:51

22420000 -- (-7556.925) [...7 remote chains...] -- 0:38:48

22430000 -- (-7559.380) [...7 remote chains...] -- 0:38:45

22440000 -- (-7557.387) [...7 remote chains...] -- 0:38:42

22450000 -- (-7566.273) [...7 remote chains...] -- 0:38:39

Average standard deviation of split frequencies: 0.007156

22460000 -- (-7562.535) [...7 remote chains...] -- 0:38:36

22470000 -- (-7570.320) [...7 remote chains...] -- 0:38:32

22480000 -- (-7566.813) [...7 remote chains...] -- 0:38:29

22490000 -- [-7554.048] [...7 remote chains...] -- 0:38:26

22500000 -- (-7564.796) [...7 remote chains...] -- 0:38:23

Average standard deviation of split frequencies: 0.007169

22510000 -- (-7546.885) [...7 remote chains...] -- 0:38:20

22520000 -- (-7536.511) [...7 remote chains...] -- 0:38:17

22530000 -- [-7565.402] [...7 remote chains...] -- 0:38:14

22540000 -- (-7567.068) [...7 remote chains...] -- 0:38:11

22550000 -- (-7548.763) [...7 remote chains...] -- 0:38:08

Average standard deviation of split frequencies: 0.007292

22560000 -- (-7550.500) [...7 remote chains...] -- 0:38:05

22570000 -- (-7565.025) [...7 remote chains...] -- 0:38:02

22580000 -- (-7553.887) [...7 remote chains...] -- 0:37:58

22590000 -- (-7543.978) [...7 remote chains...] -- 0:37:55

22600000 -- (-7569.970) [...7 remote chains...] -- 0:37:52

Average standard deviation of split frequencies: 0.007276

22610000 -- (-7553.153) [...7 remote chains...] -- 0:37:49

22620000 -- (-7569.513) [...7 remote chains...] -- 0:37:46

22630000 -- (-7555.436) [...7 remote chains...] -- 0:37:43

22640000 -- (-7542.719) [...7 remote chains...] -- 0:37:40

22650000 -- (-7563.063) [...7 remote chains...] -- 0:37:37

Average standard deviation of split frequencies: 0.007287

22660000 -- (-7562.924) [...7 remote chains...] -- 0:37:34

22670000 -- (-7571.926) [...7 remote chains...] -- 0:37:31

22680000 -- (-7564.024) [...7 remote chains...] -- 0:37:27

22690000 -- (-7569.184) [...7 remote chains...] -- 0:37:24

22700000 -- (-7541.249) [...7 remote chains...] -- 0:37:21

Average standard deviation of split frequencies: 0.007297

22710000 -- (-7568.146) [...7 remote chains...] -- 0:37:18

22720000 -- (-7541.125) [...7 remote chains...] -- 0:37:15

22730000 -- (-7558.733) [...7 remote chains...] -- 0:37:12

22740000 -- (-7571.456) [...7 remote chains...] -- 0:37:09

22750000 -- (-7587.193) [...7 remote chains...] -- 0:37:06

Average standard deviation of split frequencies: 0.007309

22760000 -- (-7557.637) [...7 remote chains...] -- 0:37:03

22770000 -- (-7567.105) [...7 remote chains...] -- 0:37:00

22780000 -- [-7544.466] [...7 remote chains...] -- 0:36:57

22790000 -- (-7539.042) [...7 remote chains...] -- 0:36:54

22800000 -- (-7563.210) [...7 remote chains...] -- 0:36:50

Average standard deviation of split frequencies: 0.007275

22810000 -- (-7574.147) [...7 remote chains...] -- 0:36:47

22820000 -- (-7555.768) [...7 remote chains...] -- 0:36:44

22830000 -- (-7555.786) [...7 remote chains...] -- 0:36:41

22840000 -- [-7553.446] [...7 remote chains...] -- 0:36:38

22850000 -- (-7560.288) [...7 remote chains...] -- 0:36:35

Average standard deviation of split frequencies: 0.007255

22860000 -- [-7545.188] [...7 remote chains...] -- 0:36:32

22870000 -- [-7560.620] [...7 remote chains...] -- 0:36:29

22880000 -- (-7561.286) [...7 remote chains...] -- 0:36:26

22890000 -- [-7545.349] [...7 remote chains...] -- 0:36:23

22900000 -- [-7569.563] [...7 remote chains...] -- 0:36:20

Average standard deviation of split frequencies: 0.007247

22910000 -- [-7573.644] [...7 remote chains...] -- 0:36:17

22920000 -- [-7542.660] [...7 remote chains...] -- 0:36:14

22930000 -- (-7549.014) [...7 remote chains...] -- 0:36:10

22940000 -- (-7557.257) [...7 remote chains...] -- 0:36:07

22950000 -- (-7551.862) [...7 remote chains...] -- 0:36:04

Average standard deviation of split frequencies: 0.007330

22960000 -- (-7551.172) [...7 remote chains...] -- 0:36:01

22970000 -- (-7581.664) [...7 remote chains...] -- 0:35:58

22980000 -- (-7562.091) [...7 remote chains...] -- 0:35:55

22990000 -- (-7589.189) [...7 remote chains...] -- 0:35:52

23000000 -- (-7550.935) [...7 remote chains...] -- 0:35:49

Average standard deviation of split frequencies: 0.007542

23010000 -- (-7573.772) [...7 remote chains...] -- 0:35:46

23020000 -- (-7551.007) [...7 remote chains...] -- 0:35:43

23030000 -- (-7541.752) [...7 remote chains...] -- 0:35:40

23040000 -- (-7547.431) [...7 remote chains...] -- 0:35:36

23050000 -- (-7545.330) [...7 remote chains...] -- 0:35:33

Average standard deviation of split frequencies: 0.007597

23060000 -- (-7574.649) [...7 remote chains...] -- 0:35:30

23070000 -- (-7575.790) [...7 remote chains...] -- 0:35:27

23080000 -- (-7536.224) [...7 remote chains...] -- 0:35:24

23090000 -- (-7555.995) [...7 remote chains...] -- 0:35:21

23100000 -- (-7554.550) [...7 remote chains...] -- 0:35:18

Average standard deviation of split frequencies: 0.007684

23110000 -- (-7560.618) [...7 remote chains...] -- 0:35:15

23120000 -- (-7561.944) [...7 remote chains...] -- 0:35:12

23130000 -- (-7561.142) [...7 remote chains...] -- 0:35:09

23140000 -- (-7560.809) [...7 remote chains...] -- 0:35:06

23150000 -- (-7544.292) [...7 remote chains...] -- 0:35:03

Average standard deviation of split frequencies: 0.007695

23160000 -- (-7550.981) [...7 remote chains...] -- 0:35:00

23170000 -- (-7545.513) [...7 remote chains...] -- 0:34:57

23180000 -- (-7557.843) [...7 remote chains...] -- 0:34:53

23190000 -- (-7550.368) [...7 remote chains...] -- 0:34:50

23200000 -- (-7553.490) [...7 remote chains...] -- 0:34:47

Average standard deviation of split frequencies: 0.007732

23210000 -- (-7553.695) [...7 remote chains...] -- 0:34:44

23220000 -- (-7555.404) [...7 remote chains...] -- 0:34:41

23230000 -- (-7568.214) [...7 remote chains...] -- 0:34:38

23240000 -- [-7540.839] [...7 remote chains...] -- 0:34:35

23250000 -- [-7543.861] [...7 remote chains...] -- 0:34:32

Average standard deviation of split frequencies: 0.007834

23260000 -- [-7546.253] [...7 remote chains...] -- 0:34:29

23270000 -- [-7564.362] [...7 remote chains...] -- 0:34:26

23280000 -- [-7548.759] [...7 remote chains...] -- 0:34:23

23290000 -- [-7542.196] [...7 remote chains...] -- 0:34:19

23300000 -- [-7533.050] [...7 remote chains...] -- 0:34:16

Average standard deviation of split frequencies: 0.007790

23310000 -- [-7532.694] [...7 remote chains...] -- 0:34:13

23320000 -- [-7542.678] [...7 remote chains...] -- 0:34:10

23330000 -- [-7539.756] [...7 remote chains...] -- 0:34:07

23340000 -- [-7552.794] [...7 remote chains...] -- 0:34:04

23350000 -- [-7557.007] [...7 remote chains...] -- 0:34:01

Average standard deviation of split frequencies: 0.007731

23360000 -- [-7549.835] [...7 remote chains...] -- 0:33:58

23370000 -- [-7552.309] [...7 remote chains...] -- 0:33:55

23380000 -- [-7554.839] [...7 remote chains...] -- 0:33:52

23390000 -- [-7556.509] [...7 remote chains...] -- 0:33:49

23400000 -- [-7540.811] [...7 remote chains...] -- 0:33:45

Average standard deviation of split frequencies: 0.007545

23410000 -- (-7555.067) [...7 remote chains...] -- 0:33:42

23420000 -- (-7587.076) [...7 remote chains...] -- 0:33:39

23430000 -- [-7580.517] [...7 remote chains...] -- 0:33:36

23440000 -- [-7558.231] [...7 remote chains...] -- 0:33:33

23450000 -- [-7569.722] [...7 remote chains...] -- 0:33:30

Average standard deviation of split frequencies: 0.007442

23460000 -- [-7549.875] [...7 remote chains...] -- 0:33:27

23470000 -- [-7529.679] [...7 remote chains...] -- 0:33:24

23480000 -- [-7535.760] [...7 remote chains...] -- 0:33:21

23490000 -- [-7549.413] [...7 remote chains...] -- 0:33:18

23500000 -- (-7546.577) [...7 remote chains...] -- 0:33:15

Average standard deviation of split frequencies: 0.007413

23510000 -- (-7568.429) [...7 remote chains...] -- 0:33:11

23520000 -- (-7555.318) [...7 remote chains...] -- 0:33:08

23530000 -- (-7518.259) [...7 remote chains...] -- 0:33:05

23540000 -- [-7547.927] [...7 remote chains...] -- 0:33:02

23550000 -- (-7573.740) [...7 remote chains...] -- 0:32:59

Average standard deviation of split frequencies: 0.007448

23560000 -- [-7550.049] [...7 remote chains...] -- 0:32:56

23570000 -- (-7539.894) [...7 remote chains...] -- 0:32:53

23580000 -- [-7542.536] [...7 remote chains...] -- 0:32:50

23590000 -- (-7570.215) [...7 remote chains...] -- 0:32:47

23600000 -- (-7559.860) [...7 remote chains...] -- 0:32:44

Average standard deviation of split frequencies: 0.007445

23610000 -- (-7560.209) [...7 remote chains...] -- 0:32:41

23620000 -- (-7548.104) [...7 remote chains...] -- 0:32:38

23630000 -- (-7596.277) [...7 remote chains...] -- 0:32:35

23640000 -- (-7560.530) [...7 remote chains...] -- 0:32:32

23650000 -- (-7552.804) [...7 remote chains...] -- 0:32:29

Average standard deviation of split frequencies: 0.007569

23660000 -- (-7568.306) [...7 remote chains...] -- 0:32:25

23670000 -- (-7548.233) [...7 remote chains...] -- 0:32:22

23680000 -- (-7555.334) [...7 remote chains...] -- 0:32:19

23690000 -- (-7566.536) [...7 remote chains...] -- 0:32:16

23700000 -- (-7557.288) [...7 remote chains...] -- 0:32:13

Average standard deviation of split frequencies: 0.007427

23710000 -- (-7557.765) [...7 remote chains...] -- 0:32:10

23720000 -- (-7565.867) [...7 remote chains...] -- 0:32:07

23730000 -- (-7555.518) [...7 remote chains...] -- 0:32:04

23740000 -- (-7560.319) [...7 remote chains...] -- 0:32:01

23750000 -- (-7573.776) [...7 remote chains...] -- 0:31:58

Average standard deviation of split frequencies: 0.007367

23760000 -- (-7568.054) [...7 remote chains...] -- 0:31:55

23770000 -- (-7574.195) [...7 remote chains...] -- 0:31:51

23780000 -- (-7559.477) [...7 remote chains...] -- 0:31:48

23790000 -- (-7563.787) [...7 remote chains...] -- 0:31:45

23800000 -- (-7575.266) [...7 remote chains...] -- 0:31:42

Average standard deviation of split frequencies: 0.007403

23810000 -- (-7558.984) [...7 remote chains...] -- 0:31:39

23820000 -- (-7579.816) [...7 remote chains...] -- 0:31:36

23830000 -- (-7561.762) [...7 remote chains...] -- 0:31:33

23840000 -- (-7578.808) [...7 remote chains...] -- 0:31:30

23850000 -- (-7564.190) [...7 remote chains...] -- 0:31:27

Average standard deviation of split frequencies: 0.007502

23860000 -- (-7538.257) [...7 remote chains...] -- 0:31:24

23870000 -- (-7561.212) [...7 remote chains...] -- 0:31:21

23880000 -- (-7557.372) [...7 remote chains...] -- 0:31:18

23890000 -- (-7558.779) [...7 remote chains...] -- 0:31:14

23900000 -- (-7546.883) [...7 remote chains...] -- 0:31:11

Average standard deviation of split frequencies: 0.007571

23910000 -- (-7542.422) [...7 remote chains...] -- 0:31:08

23920000 -- (-7554.703) [...7 remote chains...] -- 0:31:05

23930000 -- (-7562.470) [...7 remote chains...] -- 0:31:02

23940000 -- (-7553.002) [...7 remote chains...] -- 0:30:59

23950000 -- (-7549.567) [...7 remote chains...] -- 0:30:56

Average standard deviation of split frequencies: 0.007620

23960000 -- (-7550.333) [...7 remote chains...] -- 0:30:53

23970000 -- (-7544.073) [...7 remote chains...] -- 0:30:50

23980000 -- (-7555.309) [...7 remote chains...] -- 0:30:47

23990000 -- (-7566.256) [...7 remote chains...] -- 0:30:44

24000000 -- (-7575.477) [...7 remote chains...] -- 0:30:41

Average standard deviation of split frequencies: 0.007739

24010000 -- (-7550.499) [...7 remote chains...] -- 0:30:38

24020000 -- (-7548.369) [...7 remote chains...] -- 0:30:35

24030000 -- (-7539.028) [...7 remote chains...] -- 0:30:31

24040000 -- (-7560.690) [...7 remote chains...] -- 0:30:28

24050000 -- (-7541.205) [...7 remote chains...] -- 0:30:25

Average standard deviation of split frequencies: 0.007671

24060000 -- (-7555.275) [...7 remote chains...] -- 0:30:22

24070000 -- (-7557.897) [...7 remote chains...] -- 0:30:19

24080000 -- (-7546.412) [...7 remote chains...] -- 0:30:16

24090000 -- (-7566.844) [...7 remote chains...] -- 0:30:13

24100000 -- (-7574.314) [...7 remote chains...] -- 0:30:10

Average standard deviation of split frequencies: 0.007685

24110000 -- (-7552.076) [...7 remote chains...] -- 0:30:07

24120000 -- (-7532.735) [...7 remote chains...] -- 0:30:04

24130000 -- (-7555.844) [...7 remote chains...] -- 0:30:01

24140000 -- (-7566.197) [...7 remote chains...] -- 0:29:58

24150000 -- (-7558.584) [...7 remote chains...] -- 0:29:54

Average standard deviation of split frequencies: 0.007802

24160000 -- (-7555.631) [...7 remote chains...] -- 0:29:51

24170000 -- (-7569.348) [...7 remote chains...] -- 0:29:48

24180000 -- (-7547.678) [...7 remote chains...] -- 0:29:45

24190000 -- (-7556.150) [...7 remote chains...] -- 0:29:42

24200000 -- (-7553.723) [...7 remote chains...] -- 0:29:39

Average standard deviation of split frequencies: 0.007694

24210000 -- (-7564.167) [...7 remote chains...] -- 0:29:36

24220000 -- (-7576.420) [...7 remote chains...] -- 0:29:33

24230000 -- (-7551.105) [...7 remote chains...] -- 0:29:30

24240000 -- (-7570.200) [...7 remote chains...] -- 0:29:27

24250000 -- (-7585.010) [...7 remote chains...] -- 0:29:24

Average standard deviation of split frequencies: 0.007658

24260000 -- (-7561.174) [...7 remote chains...] -- 0:29:21

24270000 -- (-7549.603) [...7 remote chains...] -- 0:29:18

24280000 -- (-7556.506) [...7 remote chains...] -- 0:29:15

24290000 -- (-7562.108) [...7 remote chains...] -- 0:29:12

24300000 -- (-7536.949) [...7 remote chains...] -- 0:29:08

Average standard deviation of split frequencies: 0.007491

24310000 -- (-7549.627) [...7 remote chains...] -- 0:29:05

24320000 -- [-7539.944] [...7 remote chains...] -- 0:29:02

24330000 -- (-7554.046) [...7 remote chains...] -- 0:28:59

24340000 -- (-7568.091) [...7 remote chains...] -- 0:28:56

24350000 -- [-7560.538] [...7 remote chains...] -- 0:28:53

Average standard deviation of split frequencies: 0.007514

24360000 -- [-7550.588] [...7 remote chains...] -- 0:28:50

24370000 -- (-7547.073) [...7 remote chains...] -- 0:28:47

24380000 -- (-7570.422) [...7 remote chains...] -- 0:28:44

24390000 -- (-7549.942) [...7 remote chains...] -- 0:28:41

24400000 -- (-7547.236) [...7 remote chains...] -- 0:28:38

Average standard deviation of split frequencies: 0.007272

24410000 -- [-7551.038] [...7 remote chains...] -- 0:28:35

24420000 -- [-7546.531] [...7 remote chains...] -- 0:28:31

24430000 -- [-7551.448] [...7 remote chains...] -- 0:28:28

24440000 -- [-7555.407] [...7 remote chains...] -- 0:28:25

24450000 -- [-7540.344] [...7 remote chains...] -- 0:28:22

Average standard deviation of split frequencies: 0.007251

24460000 -- [-7544.232] [...7 remote chains...] -- 0:28:19

24470000 -- [-7550.182] [...7 remote chains...] -- 0:28:16

24480000 -- [-7548.518] [...7 remote chains...] -- 0:28:13

24490000 -- [-7541.642] [...7 remote chains...] -- 0:28:10

24500000 -- [-7545.738] [...7 remote chains...] -- 0:28:07

Average standard deviation of split frequencies: 0.007217

24510000 -- [-7561.510] [...7 remote chains...] -- 0:28:04

24520000 -- [-7550.386] [...7 remote chains...] -- 0:28:01

24530000 -- (-7545.555) [...7 remote chains...] -- 0:27:58

24540000 -- (-7546.321) [...7 remote chains...] -- 0:27:54

24550000 -- (-7560.045) [...7 remote chains...] -- 0:27:51

Average standard deviation of split frequencies: 0.007107

24560000 -- (-7603.217) [...7 remote chains...] -- 0:27:48

24570000 -- (-7582.999) [...7 remote chains...] -- 0:27:45

24580000 -- (-7535.437) [...7 remote chains...] -- 0:27:42

24590000 -- (-7547.676) [...7 remote chains...] -- 0:27:39

24600000 -- (-7541.736) [...7 remote chains...] -- 0:27:36

Average standard deviation of split frequencies: 0.007062

24610000 -- (-7556.614) [...7 remote chains...] -- 0:27:33

24620000 -- (-7567.142) [...7 remote chains...] -- 0:27:30

24630000 -- (-7534.012) [...7 remote chains...] -- 0:27:27

24640000 -- (-7572.585) [...7 remote chains...] -- 0:27:24

24650000 -- [-7558.545] [...7 remote chains...] -- 0:27:21

Average standard deviation of split frequencies: 0.007128

24660000 -- [-7531.219] [...7 remote chains...] -- 0:27:17

24670000 -- [-7545.073] [...7 remote chains...] -- 0:27:14

24680000 -- [-7548.988] [...7 remote chains...] -- 0:27:11

24690000 -- (-7534.868) [...7 remote chains...] -- 0:27:08

24700000 -- [-7547.165] [...7 remote chains...] -- 0:27:05

Average standard deviation of split frequencies: 0.007191

24710000 -- [-7545.144] [...7 remote chains...] -- 0:27:02

24720000 -- [-7558.205] [...7 remote chains...] -- 0:26:59

24730000 -- (-7554.439) [...7 remote chains...] -- 0:26:56

24740000 -- [-7552.974] [...7 remote chains...] -- 0:26:53

24750000 -- [-7537.239] [...7 remote chains...] -- 0:26:50

Average standard deviation of split frequencies: 0.007313

24760000 -- (-7565.082) [...7 remote chains...] -- 0:26:47

24770000 -- (-7561.115) [...7 remote chains...] -- 0:26:44

24780000 -- (-7551.117) [...7 remote chains...] -- 0:26:41

24790000 -- (-7543.667) [...7 remote chains...] -- 0:26:38

24800000 -- (-7570.520) [...7 remote chains...] -- 0:26:35

Average standard deviation of split frequencies: 0.007264

24810000 -- (-7554.404) [...7 remote chains...] -- 0:26:31

24820000 -- (-7551.126) [...7 remote chains...] -- 0:26:28

24830000 -- (-7556.739) [...7 remote chains...] -- 0:26:25

24840000 -- (-7553.646) [...7 remote chains...] -- 0:26:22

24850000 -- (-7546.971) [...7 remote chains...] -- 0:26:19

Average standard deviation of split frequencies: 0.007368

24860000 -- (-7549.862) [...7 remote chains...] -- 0:26:16

24870000 -- (-7555.009) [...7 remote chains...] -- 0:26:13

24880000 -- (-7552.776) [...7 remote chains...] -- 0:26:10

24890000 -- (-7554.821) [...7 remote chains...] -- 0:26:07

24900000 -- (-7562.804) [...7 remote chains...] -- 0:26:04

Average standard deviation of split frequencies: 0.007432

24910000 -- (-7535.676) [...7 remote chains...] -- 0:26:01

24920000 -- (-7550.173) [...7 remote chains...] -- 0:25:58

24930000 -- (-7558.234) [...7 remote chains...] -- 0:25:54

24940000 -- (-7551.311) [...7 remote chains...] -- 0:25:51

24950000 -- (-7538.296) [...7 remote chains...] -- 0:25:48

Average standard deviation of split frequencies: 0.007420

24960000 -- (-7546.127) [...7 remote chains...] -- 0:25:45

24970000 -- (-7557.990) [...7 remote chains...] -- 0:25:42

24980000 -- (-7557.090) [...7 remote chains...] -- 0:25:39

24990000 -- (-7565.318) [...7 remote chains...] -- 0:25:36

25000000 -- (-7555.832) [...7 remote chains...] -- 0:25:33

Average standard deviation of split frequencies: 0.007333

25010000 -- (-7546.942) [...7 remote chains...] -- 0:25:30

25020000 -- (-7535.869) [...7 remote chains...] -- 0:25:27

25030000 -- (-7539.124) [...7 remote chains...] -- 0:25:24

25040000 -- (-7565.846) [...7 remote chains...] -- 0:25:21

25050000 -- (-7539.276) [...7 remote chains...] -- 0:25:18

Average standard deviation of split frequencies: 0.007267

25060000 -- (-7553.104) [...7 remote chains...] -- 0:25:15

25070000 -- (-7549.922) [...7 remote chains...] -- 0:25:12

25080000 -- [-7562.610] [...7 remote chains...] -- 0:25:08

25090000 -- [-7550.770] [...7 remote chains...] -- 0:25:05

25100000 -- (-7566.196) [...7 remote chains...] -- 0:25:02

Average standard deviation of split frequencies: 0.007208

25110000 -- (-7550.089) [...7 remote chains...] -- 0:24:59

25120000 -- (-7556.772) [...7 remote chains...] -- 0:24:56

25130000 -- (-7572.649) [...7 remote chains...] -- 0:24:53

25140000 -- (-7561.620) [...7 remote chains...] -- 0:24:50

25150000 -- (-7553.921) [...7 remote chains...] -- 0:24:47

Average standard deviation of split frequencies: 0.007127

25160000 -- (-7564.806) [...7 remote chains...] -- 0:24:44

25170000 -- (-7570.529) [...7 remote chains...] -- 0:24:41

25180000 -- (-7570.758) [...7 remote chains...] -- 0:24:38

25190000 -- (-7563.227) [...7 remote chains...] -- 0:24:35

25200000 -- (-7552.904) [...7 remote chains...] -- 0:24:32

Average standard deviation of split frequencies: 0.006991

25210000 -- (-7543.496) [...7 remote chains...] -- 0:24:28

25220000 -- (-7548.371) [...7 remote chains...] -- 0:24:25

25230000 -- (-7546.494) [...7 remote chains...] -- 0:24:22

25240000 -- (-7581.730) [...7 remote chains...] -- 0:24:19

25250000 -- (-7554.041) [...7 remote chains...] -- 0:24:16

Average standard deviation of split frequencies: 0.006861

25260000 -- (-7541.596) [...7 remote chains...] -- 0:24:13

25270000 -- (-7571.988) [...7 remote chains...] -- 0:24:10

25280000 -- (-7561.432) [...7 remote chains...] -- 0:24:07

25290000 -- (-7553.881) [...7 remote chains...] -- 0:24:04

25300000 -- (-7542.739) [...7 remote chains...] -- 0:24:01

Average standard deviation of split frequencies: 0.006869

25310000 -- [-7543.275] [...7 remote chains...] -- 0:23:58

25320000 -- (-7545.347) [...7 remote chains...] -- 0:23:55

25330000 -- (-7557.353) [...7 remote chains...] -- 0:23:52

25340000 -- (-7555.105) [...7 remote chains...] -- 0:23:49

25350000 -- (-7540.406) [...7 remote chains...] -- 0:23:46

Average standard deviation of split frequencies: 0.006842

25360000 -- (-7550.661) [...7 remote chains...] -- 0:23:42

25370000 -- [-7543.454] [...7 remote chains...] -- 0:23:39

25380000 -- (-7561.483) [...7 remote chains...] -- 0:23:36

25390000 -- [-7563.904] [...7 remote chains...] -- 0:23:33

25400000 -- (-7533.915) [...7 remote chains...] -- 0:23:30

Average standard deviation of split frequencies: 0.006876

25410000 -- (-7553.481) [...7 remote chains...] -- 0:23:27

25420000 -- (-7541.709) [...7 remote chains...] -- 0:23:24

25430000 -- (-7547.422) [...7 remote chains...] -- 0:23:21

25440000 -- (-7543.891) [...7 remote chains...] -- 0:23:18

25450000 -- (-7536.924) [...7 remote chains...] -- 0:23:15

Average standard deviation of split frequencies: 0.006956

25460000 -- (-7550.399) [...7 remote chains...] -- 0:23:12

25470000 -- [-7547.616] [...7 remote chains...] -- 0:23:09

25480000 -- (-7568.936) [...7 remote chains...] -- 0:23:05

25490000 -- (-7546.550) [...7 remote chains...] -- 0:23:02

25500000 -- (-7544.269) [...7 remote chains...] -- 0:22:59

Average standard deviation of split frequencies: 0.007017

25510000 -- (-7551.251) [...7 remote chains...] -- 0:22:56

25520000 -- (-7574.108) [...7 remote chains...] -- 0:22:53

25530000 -- (-7569.052) [...7 remote chains...] -- 0:22:50

25540000 -- (-7549.952) [...7 remote chains...] -- 0:22:47

25550000 -- (-7551.745) [...7 remote chains...] -- 0:22:44

Average standard deviation of split frequencies: 0.006981

25560000 -- (-7572.562) [...7 remote chains...] -- 0:22:41

25570000 -- (-7550.838) [...7 remote chains...] -- 0:22:38

25580000 -- (-7557.092) [...7 remote chains...] -- 0:22:35

25590000 -- (-7559.822) [...7 remote chains...] -- 0:22:32

25600000 -- (-7562.394) [...7 remote chains...] -- 0:22:29

Average standard deviation of split frequencies: 0.006962

25610000 -- (-7551.451) [...7 remote chains...] -- 0:22:25

25620000 -- (-7565.157) [...7 remote chains...] -- 0:22:22

25630000 -- (-7572.183) [...7 remote chains...] -- 0:22:19

25640000 -- (-7566.013) [...7 remote chains...] -- 0:22:16

25650000 -- (-7557.461) [...7 remote chains...] -- 0:22:13

Average standard deviation of split frequencies: 0.006899

25660000 -- (-7558.763) [...7 remote chains...] -- 0:22:10

25670000 -- (-7565.018) [...7 remote chains...] -- 0:22:07

25680000 -- (-7538.075) [...7 remote chains...] -- 0:22:04

25690000 -- (-7548.459) [...7 remote chains...] -- 0:22:01

25700000 -- [-7556.030] [...7 remote chains...] -- 0:21:58

Average standard deviation of split frequencies: 0.006965

25710000 -- (-7539.530) [...7 remote chains...] -- 0:21:55

25720000 -- (-7552.839) [...7 remote chains...] -- 0:21:52

25730000 -- (-7554.758) [...7 remote chains...] -- 0:21:49

25740000 -- (-7572.425) [...7 remote chains...] -- 0:21:46

25750000 -- (-7562.681) [...7 remote chains...] -- 0:21:43

Average standard deviation of split frequencies: 0.006888

25760000 -- (-7551.615) [...7 remote chains...] -- 0:21:39

25770000 -- (-7578.057) [...7 remote chains...] -- 0:21:36

25780000 -- (-7573.095) [...7 remote chains...] -- 0:21:33

25790000 -- (-7565.689) [...7 remote chains...] -- 0:21:30

25800000 -- (-7538.685) [...7 remote chains...] -- 0:21:27

Average standard deviation of split frequencies: 0.006949

25810000 -- (-7571.523) [...7 remote chains...] -- 0:21:24

25820000 -- (-7547.897) [...7 remote chains...] -- 0:21:21

25830000 -- (-7549.194) [...7 remote chains...] -- 0:21:18

25840000 -- (-7554.049) [...7 remote chains...] -- 0:21:15

25850000 -- [-7568.351] [...7 remote chains...] -- 0:21:12

Average standard deviation of split frequencies: 0.006829

25860000 -- [-7545.690] [...7 remote chains...] -- 0:21:09

25870000 -- [-7552.296] [...7 remote chains...] -- 0:21:06

25880000 -- (-7551.487) [...7 remote chains...] -- 0:21:03

25890000 -- (-7563.517) [...7 remote chains...] -- 0:20:59

25900000 -- (-7556.024) [...7 remote chains...] -- 0:20:56

Average standard deviation of split frequencies: 0.006660

25910000 -- (-7551.202) [...7 remote chains...] -- 0:20:53

25920000 -- (-7538.236) [...7 remote chains...] -- 0:20:50

25930000 -- (-7592.446) [...7 remote chains...] -- 0:20:47

25940000 -- (-7569.998) [...7 remote chains...] -- 0:20:44

25950000 -- (-7563.998) [...7 remote chains...] -- 0:20:41

Average standard deviation of split frequencies: 0.006619

25960000 -- (-7538.969) [...7 remote chains...] -- 0:20:38

25970000 -- (-7558.960) [...7 remote chains...] -- 0:20:35

25980000 -- (-7580.586) [...7 remote chains...] -- 0:20:32

25990000 -- (-7548.473) [...7 remote chains...] -- 0:20:29

26000000 -- (-7542.155) [...7 remote chains...] -- 0:20:26

Average standard deviation of split frequencies: 0.006628

26010000 -- (-7565.462) [...7 remote chains...] -- 0:20:23

26020000 -- (-7570.359) [...7 remote chains...] -- 0:20:20

26030000 -- (-7563.261) [...7 remote chains...] -- 0:20:16

26040000 -- (-7559.967) [...7 remote chains...] -- 0:20:13

26050000 -- (-7563.499) [...7 remote chains...] -- 0:20:10

Average standard deviation of split frequencies: 0.006603

26060000 -- (-7550.244) [...7 remote chains...] -- 0:20:07

26070000 -- (-7529.128) [...7 remote chains...] -- 0:20:04

26080000 -- (-7548.526) [...7 remote chains...] -- 0:20:01

26090000 -- (-7570.333) [...7 remote chains...] -- 0:19:58

26100000 -- (-7559.515) [...7 remote chains...] -- 0:19:55

Average standard deviation of split frequencies: 0.006510

26110000 -- (-7560.450) [...7 remote chains...] -- 0:19:52

26120000 -- (-7553.729) [...7 remote chains...] -- 0:19:49

26130000 -- (-7549.259) [...7 remote chains...] -- 0:19:46

26140000 -- (-7557.560) [...7 remote chains...] -- 0:19:43

26150000 -- (-7566.667) [...7 remote chains...] -- 0:19:40

Average standard deviation of split frequencies: 0.006477

26160000 -- (-7553.878) [...7 remote chains...] -- 0:19:37

26170000 -- (-7548.115) [...7 remote chains...] -- 0:19:34

26180000 -- (-7553.266) [...7 remote chains...] -- 0:19:30

26190000 -- (-7544.949) [...7 remote chains...] -- 0:19:27

26200000 -- (-7552.220) [...7 remote chains...] -- 0:19:24

Average standard deviation of split frequencies: 0.006460

26210000 -- (-7567.246) [...7 remote chains...] -- 0:19:21

26220000 -- (-7557.909) [...7 remote chains...] -- 0:19:18

26230000 -- (-7554.449) [...7 remote chains...] -- 0:19:15

26240000 -- (-7553.761) [...7 remote chains...] -- 0:19:12

26250000 -- (-7580.243) [...7 remote chains...] -- 0:19:09

Average standard deviation of split frequencies: 0.006370

26260000 -- (-7584.170) [...7 remote chains...] -- 0:19:06

26270000 -- (-7580.798) [...7 remote chains...] -- 0:19:03

26280000 -- (-7562.903) [...7 remote chains...] -- 0:19:00

26290000 -- (-7566.610) [...7 remote chains...] -- 0:18:57

26300000 -- (-7557.882) [...7 remote chains...] -- 0:18:54

Average standard deviation of split frequencies: 0.006354

26310000 -- (-7570.853) [...7 remote chains...] -- 0:18:50

26320000 -- (-7560.535) [...7 remote chains...] -- 0:18:47

26330000 -- (-7549.801) [...7 remote chains...] -- 0:18:44

26340000 -- (-7561.881) [...7 remote chains...] -- 0:18:41

26350000 -- (-7536.266) [...7 remote chains...] -- 0:18:38

Average standard deviation of split frequencies: 0.006289

26360000 -- (-7547.227) [...7 remote chains...] -- 0:18:35

26370000 -- [-7549.523] [...7 remote chains...] -- 0:18:32

26380000 -- [-7545.230] [...7 remote chains...] -- 0:18:29

26390000 -- [-7545.239] [...7 remote chains...] -- 0:18:26

26400000 -- [-7544.806] [...7 remote chains...] -- 0:18:23

Average standard deviation of split frequencies: 0.006212

26410000 -- [-7552.881] [...7 remote chains...] -- 0:18:20

26420000 -- (-7561.526) [...7 remote chains...] -- 0:18:17

26430000 -- [-7551.589] [...7 remote chains...] -- 0:18:14

26440000 -- (-7550.735) [...7 remote chains...] -- 0:18:11

26450000 -- [-7556.368] [...7 remote chains...] -- 0:18:07

Average standard deviation of split frequencies: 0.006135

26460000 -- [-7550.926] [...7 remote chains...] -- 0:18:04

26470000 -- [-7550.044] [...7 remote chains...] -- 0:18:01

26480000 -- [-7561.843] [...7 remote chains...] -- 0:17:58

26490000 -- [-7567.939] [...7 remote chains...] -- 0:17:55

26500000 -- [-7566.532] [...7 remote chains...] -- 0:17:52

Average standard deviation of split frequencies: 0.006058

26510000 -- [-7557.277] [...7 remote chains...] -- 0:17:49

26520000 -- (-7570.203) [...7 remote chains...] -- 0:17:46

26530000 -- [-7563.691] [...7 remote chains...] -- 0:17:43

26540000 -- [-7553.803] [...7 remote chains...] -- 0:17:40

26550000 -- [-7570.234] [...7 remote chains...] -- 0:17:37

Average standard deviation of split frequencies: 0.006031

26560000 -- (-7571.207) [...7 remote chains...] -- 0:17:34

26570000 -- (-7567.375) [...7 remote chains...] -- 0:17:31

26580000 -- (-7552.713) [...7 remote chains...] -- 0:17:28

26590000 -- (-7554.005) [...7 remote chains...] -- 0:17:25

26600000 -- (-7584.773) [...7 remote chains...] -- 0:17:21

Average standard deviation of split frequencies: 0.006063

26610000 -- (-7563.403) [...7 remote chains...] -- 0:17:18

26620000 -- (-7564.648) [...7 remote chains...] -- 0:17:15

26630000 -- (-7554.040) [...7 remote chains...] -- 0:17:12

26640000 -- (-7541.492) [...7 remote chains...] -- 0:17:09

26650000 -- (-7562.950) [...7 remote chains...] -- 0:17:06

Average standard deviation of split frequencies: 0.006136

26660000 -- (-7555.915) [...7 remote chains...] -- 0:17:03

26670000 -- (-7545.679) [...7 remote chains...] -- 0:17:00

26680000 -- (-7547.564) [...7 remote chains...] -- 0:16:57

26690000 -- (-7569.748) [...7 remote chains...] -- 0:16:54

26700000 -- (-7567.152) [...7 remote chains...] -- 0:16:51

Average standard deviation of split frequencies: 0.006142

26710000 -- (-7554.859) [...7 remote chains...] -- 0:16:48

26720000 -- (-7545.785) [...7 remote chains...] -- 0:16:45

26730000 -- (-7554.515) [...7 remote chains...] -- 0:16:42

26740000 -- (-7553.513) [...7 remote chains...] -- 0:16:38

26750000 -- (-7568.904) [...7 remote chains...] -- 0:16:35

Average standard deviation of split frequencies: 0.006117

26760000 -- (-7544.174) [...7 remote chains...] -- 0:16:32

26770000 -- (-7558.074) [...7 remote chains...] -- 0:16:29

26780000 -- (-7582.420) [...7 remote chains...] -- 0:16:26

26790000 -- (-7566.142) [...7 remote chains...] -- 0:16:23

26800000 -- (-7565.431) [...7 remote chains...] -- 0:16:20

Average standard deviation of split frequencies: 0.006079

26810000 -- (-7554.196) [...7 remote chains...] -- 0:16:17

26820000 -- (-7556.207) [...7 remote chains...] -- 0:16:14

26830000 -- (-7554.987) [...7 remote chains...] -- 0:16:11

26840000 -- [-7537.878] [...7 remote chains...] -- 0:16:08

26850000 -- [-7544.185] [...7 remote chains...] -- 0:16:05

Average standard deviation of split frequencies: 0.005976

26860000 -- [-7535.943] [...7 remote chains...] -- 0:16:02

26870000 -- [-7556.152] [...7 remote chains...] -- 0:15:59

26880000 -- [-7546.984] [...7 remote chains...] -- 0:15:55

26890000 -- [-7537.982] [...7 remote chains...] -- 0:15:52

26900000 -- (-7545.460) [...7 remote chains...] -- 0:15:49

Average standard deviation of split frequencies: 0.006018

26910000 -- [-7543.497] [...7 remote chains...] -- 0:15:46

26920000 -- [-7555.194] [...7 remote chains...] -- 0:15:43

26930000 -- [-7548.897] [...7 remote chains...] -- 0:15:40

26940000 -- [-7560.316] [...7 remote chains...] -- 0:15:37

26950000 -- [-7541.087] [...7 remote chains...] -- 0:15:34

Average standard deviation of split frequencies: 0.006044

26960000 -- [-7548.193] [...7 remote chains...] -- 0:15:31

26970000 -- [-7547.888] [...7 remote chains...] -- 0:15:28

26980000 -- [-7545.023] [...7 remote chains...] -- 0:15:25

26990000 -- [-7535.511] [...7 remote chains...] -- 0:15:22

27000000 -- (-7541.752) [...7 remote chains...] -- 0:15:19

Average standard deviation of split frequencies: 0.006038

27010000 -- [-7541.598] [...7 remote chains...] -- 0:15:16

27020000 -- [-7556.789] [...7 remote chains...] -- 0:15:12

27030000 -- (-7554.692) [...7 remote chains...] -- 0:15:10

27040000 -- [-7547.508] [...7 remote chains...] -- 0:15:06

27050000 -- [-7550.360] [...7 remote chains...] -- 0:15:03

Average standard deviation of split frequencies: 0.006091

27060000 -- [-7547.578] [...7 remote chains...] -- 0:15:00

27070000 -- [-7548.565] [...7 remote chains...] -- 0:14:57

27080000 -- [-7546.919] [...7 remote chains...] -- 0:14:54

27090000 -- [-7549.479] [...7 remote chains...] -- 0:14:51

27100000 -- [-7556.438] [...7 remote chains...] -- 0:14:48

Average standard deviation of split frequencies: 0.006176

27110000 -- [-7566.666] [...7 remote chains...] -- 0:14:45

27120000 -- (-7561.657) [...7 remote chains...] -- 0:14:42

27130000 -- [-7532.661] [...7 remote chains...] -- 0:14:39

27140000 -- [-7531.290] [...7 remote chains...] -- 0:14:36

27150000 -- (-7555.192) [...7 remote chains...] -- 0:14:33

Average standard deviation of split frequencies: 0.006198

27160000 -- [-7539.278] [...7 remote chains...] -- 0:14:30

27170000 -- [-7538.780] [...7 remote chains...] -- 0:14:27

27180000 -- [-7554.129] [...7 remote chains...] -- 0:14:23

27190000 -- [-7569.752] [...7 remote chains...] -- 0:14:20

27200000 -- [-7548.443] [...7 remote chains...] -- 0:14:17

Average standard deviation of split frequencies: 0.006231

27210000 -- [-7542.738] [...7 remote chains...] -- 0:14:14

27220000 -- [-7567.035] [...7 remote chains...] -- 0:14:11

27230000 -- [-7567.164] [...7 remote chains...] -- 0:14:08

27240000 -- [-7569.723] [...7 remote chains...] -- 0:14:05

27250000 -- [-7558.422] [...7 remote chains...] -- 0:14:02

Average standard deviation of split frequencies: 0.006130

27260000 -- [-7554.391] [...7 remote chains...] -- 0:13:59

27270000 -- [-7540.434] [...7 remote chains...] -- 0:13:56

27280000 -- [-7547.459] [...7 remote chains...] -- 0:13:53

27290000 -- [-7555.301] [...7 remote chains...] -- 0:13:50

27300000 -- [-7552.649] [...7 remote chains...] -- 0:13:47

Average standard deviation of split frequencies: 0.006053

27310000 -- [-7551.270] [...7 remote chains...] -- 0:13:44

27320000 -- [-7551.349] [...7 remote chains...] -- 0:13:40

27330000 -- [-7557.432] [...7 remote chains...] -- 0:13:37

27340000 -- [-7573.330] [...7 remote chains...] -- 0:13:34

27350000 -- [-7560.508] [...7 remote chains...] -- 0:13:31

Average standard deviation of split frequencies: 0.006036

27360000 -- [-7536.939] [...7 remote chains...] -- 0:13:28

27370000 -- [-7572.113] [...7 remote chains...] -- 0:13:25

27380000 -- [-7554.986] [...7 remote chains...] -- 0:13:22

27390000 -- [-7570.335] [...7 remote chains...] -- 0:13:19

27400000 -- [-7548.295] [...7 remote chains...] -- 0:13:16

Average standard deviation of split frequencies: 0.006025

27410000 -- [-7564.570] [...7 remote chains...] -- 0:13:13

27420000 -- [-7568.253] [...7 remote chains...] -- 0:13:10

27430000 -- [-7579.492] [...7 remote chains...] -- 0:13:07

27440000 -- [-7555.990] [...7 remote chains...] -- 0:13:04

27450000 -- [-7555.153] [...7 remote chains...] -- 0:13:01

Average standard deviation of split frequencies: 0.005980

27460000 -- [-7557.812] [...7 remote chains...] -- 0:12:58

27470000 -- [-7542.480] [...7 remote chains...] -- 0:12:55

27480000 -- [-7563.745] [...7 remote chains...] -- 0:12:51

27490000 -- [-7539.643] [...7 remote chains...] -- 0:12:48

27500000 -- (-7535.343) [...7 remote chains...] -- 0:12:45

Average standard deviation of split frequencies: 0.005874

27510000 -- (-7564.183) [...7 remote chains...] -- 0:12:42

27520000 -- (-7566.429) [...7 remote chains...] -- 0:12:39

27530000 -- (-7547.689) [...7 remote chains...] -- 0:12:36

27540000 -- (-7545.665) [...7 remote chains...] -- 0:12:33

27550000 -- (-7558.319) [...7 remote chains...] -- 0:12:30

Average standard deviation of split frequencies: 0.005900

27560000 -- (-7541.034) [...7 remote chains...] -- 0:12:27

27570000 -- (-7546.946) [...7 remote chains...] -- 0:12:24

27580000 -- (-7556.514) [...7 remote chains...] -- 0:12:21

27590000 -- (-7564.456) [...7 remote chains...] -- 0:12:18

27600000 -- (-7556.113) [...7 remote chains...] -- 0:12:15

Average standard deviation of split frequencies: 0.005944

27610000 -- [-7544.552] [...7 remote chains...] -- 0:12:12

27620000 -- [-7548.366] [...7 remote chains...] -- 0:12:08

27630000 -- [-7558.462] [...7 remote chains...] -- 0:12:05

27640000 -- (-7565.935) [...7 remote chains...] -- 0:12:02

27650000 -- (-7534.064) [...7 remote chains...] -- 0:11:59

Average standard deviation of split frequencies: 0.005961

27660000 -- (-7569.279) [...7 remote chains...] -- 0:11:56

27670000 -- (-7569.003) [...7 remote chains...] -- 0:11:53

27680000 -- (-7602.915) [...7 remote chains...] -- 0:11:50

27690000 -- (-7549.097) [...7 remote chains...] -- 0:11:47

27700000 -- (-7571.386) [...7 remote chains...] -- 0:11:44

Average standard deviation of split frequencies: 0.005945

27710000 -- (-7560.504) [...7 remote chains...] -- 0:11:41

27720000 -- (-7580.681) [...7 remote chains...] -- 0:11:38

27730000 -- (-7556.585) [...7 remote chains...] -- 0:11:35

27740000 -- (-7573.139) [...7 remote chains...] -- 0:11:32

27750000 -- (-7544.503) [...7 remote chains...] -- 0:11:29

Average standard deviation of split frequencies: 0.005977

27760000 -- [-7554.333] [...7 remote chains...] -- 0:11:26

27770000 -- [-7567.565] [...7 remote chains...] -- 0:11:23

27780000 -- [-7544.064] [...7 remote chains...] -- 0:11:19

27790000 -- [-7566.692] [...7 remote chains...] -- 0:11:16

27800000 -- [-7537.669] [...7 remote chains...] -- 0:11:13

Average standard deviation of split frequencies: 0.006048

27810000 -- (-7568.573) [...7 remote chains...] -- 0:11:10

27820000 -- [-7555.947] [...7 remote chains...] -- 0:11:07

27830000 -- (-7566.249) [...7 remote chains...] -- 0:11:04

27840000 -- (-7564.097) [...7 remote chains...] -- 0:11:01

27850000 -- (-7561.307) [...7 remote chains...] -- 0:10:58

Average standard deviation of split frequencies: 0.006132

27860000 -- (-7570.948) [...7 remote chains...] -- 0:10:55

27870000 -- (-7567.757) [...7 remote chains...] -- 0:10:52

27880000 -- (-7554.383) [...7 remote chains...] -- 0:10:49

27890000 -- (-7573.275) [...7 remote chains...] -- 0:10:46

27900000 -- (-7558.037) [...7 remote chains...] -- 0:10:43

Average standard deviation of split frequencies: 0.006084

27910000 -- (-7556.505) [...7 remote chains...] -- 0:10:40

27920000 -- (-7534.990) [...7 remote chains...] -- 0:10:37

27930000 -- (-7545.846) [...7 remote chains...] -- 0:10:33

27940000 -- (-7540.737) [...7 remote chains...] -- 0:10:30

27950000 -- (-7571.721) [...7 remote chains...] -- 0:10:27

Average standard deviation of split frequencies: 0.005993

27960000 -- (-7568.525) [...7 remote chains...] -- 0:10:24

27970000 -- (-7540.869) [...7 remote chains...] -- 0:10:21

27980000 -- (-7557.121) [...7 remote chains...] -- 0:10:18

27990000 -- (-7567.686) [...7 remote chains...] -- 0:10:15

28000000 -- (-7565.890) [...7 remote chains...] -- 0:10:12

Average standard deviation of split frequencies: 0.006107

28010000 -- (-7548.698) [...7 remote chains...] -- 0:10:09

28020000 -- (-7541.149) [...7 remote chains...] -- 0:10:06

28030000 -- (-7559.608) [...7 remote chains...] -- 0:10:03

28040000 -- (-7587.386) [...7 remote chains...] -- 0:10:00

28050000 -- (-7573.852) [...7 remote chains...] -- 0:09:57

Average standard deviation of split frequencies: 0.006023

28060000 -- (-7564.251) [...7 remote chains...] -- 0:09:54

28070000 -- (-7544.642) [...7 remote chains...] -- 0:09:51

28080000 -- (-7560.523) [...7 remote chains...] -- 0:09:48

28090000 -- (-7573.323) [...7 remote chains...] -- 0:09:44

28100000 -- (-7554.970) [...7 remote chains...] -- 0:09:41

Average standard deviation of split frequencies: 0.005973

28110000 -- (-7585.491) [...7 remote chains...] -- 0:09:38

28120000 -- (-7545.750) [...7 remote chains...] -- 0:09:35

28130000 -- (-7558.844) [...7 remote chains...] -- 0:09:32

28140000 -- (-7547.078) [...7 remote chains...] -- 0:09:29

28150000 -- (-7564.026) [...7 remote chains...] -- 0:09:26

Average standard deviation of split frequencies: 0.006082

28160000 -- (-7568.158) [...7 remote chains...] -- 0:09:23

28170000 -- (-7547.513) [...7 remote chains...] -- 0:09:20

28180000 -- [-7561.473] [...7 remote chains...] -- 0:09:17

28190000 -- [-7546.575] [...7 remote chains...] -- 0:09:14

28200000 -- [-7549.606] [...7 remote chains...] -- 0:09:11

Average standard deviation of split frequencies: 0.006083

28210000 -- [-7566.662] [...7 remote chains...] -- 0:09:08

28220000 -- (-7558.465) [...7 remote chains...] -- 0:09:05

28230000 -- (-7553.027) [...7 remote chains...] -- 0:09:02

28240000 -- (-7565.883) [...7 remote chains...] -- 0:08:58

28250000 -- (-7541.962) [...7 remote chains...] -- 0:08:55

Average standard deviation of split frequencies: 0.006083

28260000 -- (-7553.052) [...7 remote chains...] -- 0:08:52

28270000 -- (-7568.925) [...7 remote chains...] -- 0:08:49

28280000 -- (-7575.242) [...7 remote chains...] -- 0:08:46

28290000 -- (-7574.975) [...7 remote chains...] -- 0:08:43

28300000 -- (-7569.086) [...7 remote chains...] -- 0:08:40

Average standard deviation of split frequencies: 0.006023

28310000 -- (-7563.672) [...7 remote chains...] -- 0:08:37

28320000 -- (-7549.428) [...7 remote chains...] -- 0:08:34

28330000 -- (-7575.306) [...7 remote chains...] -- 0:08:31

28340000 -- (-7552.551) [...7 remote chains...] -- 0:08:28

28350000 -- (-7555.461) [...7 remote chains...] -- 0:08:25

Average standard deviation of split frequencies: 0.005896

28360000 -- (-7543.528) [...7 remote chains...] -- 0:08:22

28370000 -- (-7550.749) [...7 remote chains...] -- 0:08:19

28380000 -- (-7565.122) [...7 remote chains...] -- 0:08:16

28390000 -- [-7543.441] [...7 remote chains...] -- 0:08:13

28400000 -- (-7554.083) [...7 remote chains...] -- 0:08:09

Average standard deviation of split frequencies: 0.005927

28410000 -- (-7561.744) [...7 remote chains...] -- 0:08:06

28420000 -- [-7554.290] [...7 remote chains...] -- 0:08:03

28430000 -- [-7537.417] [...7 remote chains...] -- 0:08:00

28440000 -- [-7562.812] [...7 remote chains...] -- 0:07:57

28450000 -- (-7544.939) [...7 remote chains...] -- 0:07:54

Average standard deviation of split frequencies: 0.005908

28460000 -- [-7546.162] [...7 remote chains...] -- 0:07:51

28470000 -- [-7524.842] [...7 remote chains...] -- 0:07:48

28480000 -- [-7549.279] [...7 remote chains...] -- 0:07:45

28490000 -- [-7562.086] [...7 remote chains...] -- 0:07:42

28500000 -- [-7553.375] [...7 remote chains...] -- 0:07:39

Average standard deviation of split frequencies: 0.005824

28510000 -- [-7555.713] [...7 remote chains...] -- 0:07:36

28520000 -- [-7549.765] [...7 remote chains...] -- 0:07:33

28530000 -- [-7550.337] [...7 remote chains...] -- 0:07:30

28540000 -- (-7556.291) [...7 remote chains...] -- 0:07:27

28550000 -- [-7539.573] [...7 remote chains...] -- 0:07:23

Average standard deviation of split frequencies: 0.005841

28560000 -- (-7560.235) [...7 remote chains...] -- 0:07:20

28570000 -- (-7562.356) [...7 remote chains...] -- 0:07:17

28580000 -- [-7547.532] [...7 remote chains...] -- 0:07:14

28590000 -- (-7561.813) [...7 remote chains...] -- 0:07:11

28600000 -- (-7541.553) [...7 remote chains...] -- 0:07:08

Average standard deviation of split frequencies: 0.005827

28610000 -- [-7540.057] [...7 remote chains...] -- 0:07:05

28620000 -- [-7537.744] [...7 remote chains...] -- 0:07:02

28630000 -- (-7537.881) [...7 remote chains...] -- 0:06:59

28640000 -- (-7562.958) [...7 remote chains...] -- 0:06:56

28650000 -- (-7540.779) [...7 remote chains...] -- 0:06:53

Average standard deviation of split frequencies: 0.005820

28660000 -- (-7589.527) [...7 remote chains...] -- 0:06:50

28670000 -- [-7535.268] [...7 remote chains...] -- 0:06:47

28680000 -- (-7561.985) [...7 remote chains...] -- 0:06:44

28690000 -- [-7570.596] [...7 remote chains...] -- 0:06:41

28700000 -- [-7569.615] [...7 remote chains...] -- 0:06:38

Average standard deviation of split frequencies: 0.005822

28710000 -- [-7547.138] [...7 remote chains...] -- 0:06:34

28720000 -- (-7558.692) [...7 remote chains...] -- 0:06:31

28730000 -- [-7565.300] [...7 remote chains...] -- 0:06:28

28740000 -- (-7550.306) [...7 remote chains...] -- 0:06:25

28750000 -- (-7550.542) [...7 remote chains...] -- 0:06:22

Average standard deviation of split frequencies: 0.005770

28760000 -- (-7541.223) [...7 remote chains...] -- 0:06:19

28770000 -- (-7548.510) [...7 remote chains...] -- 0:06:16

28780000 -- [-7540.933] [...7 remote chains...] -- 0:06:13

28790000 -- [-7549.824] [...7 remote chains...] -- 0:06:10

28800000 -- [-7540.612] [...7 remote chains...] -- 0:06:07

Average standard deviation of split frequencies: 0.005727

28810000 -- [-7548.980] [...7 remote chains...] -- 0:06:04

28820000 -- (-7557.487) [...7 remote chains...] -- 0:06:01

28830000 -- [-7539.211] [...7 remote chains...] -- 0:05:58

28840000 -- [-7552.938] [...7 remote chains...] -- 0:05:55

28850000 -- [-7561.770] [...7 remote chains...] -- 0:05:52

Average standard deviation of split frequencies: 0.005658

28860000 -- [-7557.979] [...7 remote chains...] -- 0:05:49

28870000 -- [-7549.873] [...7 remote chains...] -- 0:05:45

28880000 -- [-7540.971] [...7 remote chains...] -- 0:05:42

28890000 -- [-7536.428] [...7 remote chains...] -- 0:05:39

28900000 -- [-7563.786] [...7 remote chains...] -- 0:05:36

Average standard deviation of split frequencies: 0.005641

28910000 -- [-7541.523] [...7 remote chains...] -- 0:05:33

28920000 -- (-7547.409) [...7 remote chains...] -- 0:05:30

28930000 -- [-7542.755] [...7 remote chains...] -- 0:05:27

28940000 -- [-7551.457] [...7 remote chains...] -- 0:05:24

28950000 -- (-7559.517) [...7 remote chains...] -- 0:05:21

Average standard deviation of split frequencies: 0.005571

28960000 -- (-7556.591) [...7 remote chains...] -- 0:05:18

28970000 -- (-7564.745) [...7 remote chains...] -- 0:05:15

28980000 -- [-7557.041] [...7 remote chains...] -- 0:05:12

28990000 -- [-7531.992] [...7 remote chains...] -- 0:05:09

29000000 -- (-7537.577) [...7 remote chains...] -- 0:05:06

Average standard deviation of split frequencies: 0.005540

29010000 -- (-7549.517) [...7 remote chains...] -- 0:05:03

29020000 -- (-7565.455) [...7 remote chains...] -- 0:05:00

29030000 -- [-7544.995] [...7 remote chains...] -- 0:04:56

29040000 -- [-7575.666] [...7 remote chains...] -- 0:04:53

29050000 -- [-7540.050] [...7 remote chains...] -- 0:04:50

Average standard deviation of split frequencies: 0.005452

29060000 -- [-7562.912] [...7 remote chains...] -- 0:04:47

29070000 -- (-7573.815) [...7 remote chains...] -- 0:04:44

29080000 -- (-7561.401) [...7 remote chains...] -- 0:04:41

29090000 -- (-7581.654) [...7 remote chains...] -- 0:04:38

29100000 -- (-7563.741) [...7 remote chains...] -- 0:04:35

Average standard deviation of split frequencies: 0.005401

29110000 -- (-7533.076) [...7 remote chains...] -- 0:04:32

29120000 -- (-7580.601) [...7 remote chains...] -- 0:04:29

29130000 -- (-7557.425) [...7 remote chains...] -- 0:04:26

29140000 -- (-7558.901) [...7 remote chains...] -- 0:04:23

29150000 -- [-7544.742] [...7 remote chains...] -- 0:04:20

Average standard deviation of split frequencies: 0.005441

29160000 -- (-7552.791) [...7 remote chains...] -- 0:04:17

29170000 -- (-7565.408) [...7 remote chains...] -- 0:04:14

29180000 -- (-7559.508) [...7 remote chains...] -- 0:04:11

29190000 -- (-7537.280) [...7 remote chains...] -- 0:04:07

29200000 -- (-7567.515) [...7 remote chains...] -- 0:04:04

Average standard deviation of split frequencies: 0.005499

29210000 -- (-7541.717) [...7 remote chains...] -- 0:04:01

29220000 -- (-7559.006) [...7 remote chains...] -- 0:03:58

29230000 -- (-7559.964) [...7 remote chains...] -- 0:03:55

29240000 -- (-7557.499) [...7 remote chains...] -- 0:03:52

29250000 -- (-7562.935) [...7 remote chains...] -- 0:03:49

Average standard deviation of split frequencies: 0.005540

29260000 -- (-7554.109) [...7 remote chains...] -- 0:03:46

29270000 -- (-7564.512) [...7 remote chains...] -- 0:03:43

29280000 -- (-7555.313) [...7 remote chains...] -- 0:03:40

29290000 -- (-7561.226) [...7 remote chains...] -- 0:03:37

29300000 -- (-7562.595) [...7 remote chains...] -- 0:03:34

Average standard deviation of split frequencies: 0.005535

29310000 -- (-7566.688) [...7 remote chains...] -- 0:03:31

29320000 -- (-7544.153) [...7 remote chains...] -- 0:03:28

29330000 -- (-7557.949) [...7 remote chains...] -- 0:03:25

29340000 -- (-7547.762) [...7 remote chains...] -- 0:03:22

29350000 -- (-7558.884) [...7 remote chains...] -- 0:03:18

Average standard deviation of split frequencies: 0.005630

29360000 -- (-7558.652) [...7 remote chains...] -- 0:03:15

29370000 -- (-7558.071) [...7 remote chains...] -- 0:03:12

29380000 -- (-7561.799) [...7 remote chains...] -- 0:03:09

29390000 -- (-7546.719) [...7 remote chains...] -- 0:03:06

29400000 -- (-7546.390) [...7 remote chains...] -- 0:03:03

Average standard deviation of split frequencies: 0.005560

29410000 -- (-7547.747) [...7 remote chains...] -- 0:03:00

29420000 -- (-7581.516) [...7 remote chains...] -- 0:02:57

29430000 -- (-7576.616) [...7 remote chains...] -- 0:02:54

29440000 -- (-7576.811) [...7 remote chains...] -- 0:02:51

29450000 -- (-7559.430) [...7 remote chains...] -- 0:02:48

Average standard deviation of split frequencies: 0.005359

29460000 -- (-7557.397) [...7 remote chains...] -- 0:02:45

29470000 -- (-7551.025) [...7 remote chains...] -- 0:02:42

29480000 -- (-7566.052) [...7 remote chains...] -- 0:02:39

29490000 -- (-7556.989) [...7 remote chains...] -- 0:02:36

29500000 -- (-7576.560) [...7 remote chains...] -- 0:02:33

Average standard deviation of split frequencies: 0.005258

29510000 -- (-7552.573) [...7 remote chains...] -- 0:02:29

29520000 -- (-7544.535) [...7 remote chains...] -- 0:02:26

29530000 -- (-7558.280) [...7 remote chains...] -- 0:02:23

29540000 -- (-7558.703) [...7 remote chains...] -- 0:02:20

29550000 -- (-7559.673) [...7 remote chains...] -- 0:02:17

Average standard deviation of split frequencies: 0.005263

29560000 -- (-7570.144) [...7 remote chains...] -- 0:02:14

29570000 -- (-7565.188) [...7 remote chains...] -- 0:02:11

29580000 -- (-7576.191) [...7 remote chains...] -- 0:02:08

29590000 -- (-7574.746) [...7 remote chains...] -- 0:02:05

29600000 -- (-7583.873) [...7 remote chains...] -- 0:02:02

Average standard deviation of split frequencies: 0.005315

29610000 -- (-7575.684) [...7 remote chains...] -- 0:01:59

29620000 -- (-7567.280) [...7 remote chains...] -- 0:01:56

29630000 -- (-7552.273) [...7 remote chains...] -- 0:01:53

29640000 -- (-7569.244) [...7 remote chains...] -- 0:01:50

29650000 -- (-7555.381) [...7 remote chains...] -- 0:01:47

Average standard deviation of split frequencies: 0.005351

29660000 -- (-7543.651) [...7 remote chains...] -- 0:01:44

29670000 -- (-7569.097) [...7 remote chains...] -- 0:01:41

29680000 -- (-7538.641) [...7 remote chains...] -- 0:01:37

29690000 -- (-7564.524) [...7 remote chains...] -- 0:01:34

29700000 -- (-7551.033) [...7 remote chains...] -- 0:01:31

Average standard deviation of split frequencies: 0.005313

29710000 -- (-7559.362) [...7 remote chains...] -- 0:01:28

29720000 -- (-7554.655) [...7 remote chains...] -- 0:01:25

29730000 -- (-7557.708) [...7 remote chains...] -- 0:01:22

29740000 -- (-7560.975) [...7 remote chains...] -- 0:01:19

29750000 -- (-7569.668) [...7 remote chains...] -- 0:01:16

Average standard deviation of split frequencies: 0.005327

29760000 -- (-7567.553) [...7 remote chains...] -- 0:01:13

29770000 -- (-7541.298) [...7 remote chains...] -- 0:01:10

29780000 -- (-7537.239) [...7 remote chains...] -- 0:01:07

29790000 -- (-7545.785) [...7 remote chains...] -- 0:01:04

29800000 -- (-7554.683) [...7 remote chains...] -- 0:01:01

Average standard deviation of split frequencies: 0.005362

29810000 -- (-7550.938) [...7 remote chains...] -- 0:00:58

29820000 -- (-7558.611) [...7 remote chains...] -- 0:00:55

29830000 -- (-7561.774) [...7 remote chains...] -- 0:00:52

29840000 -- (-7584.014) [...7 remote chains...] -- 0:00:48

29850000 -- (-7577.951) [...7 remote chains...] -- 0:00:45

Average standard deviation of split frequencies: 0.005379

29860000 -- (-7565.803) [...7 remote chains...] -- 0:00:42

29870000 -- (-7588.930) [...7 remote chains...] -- 0:00:39

29880000 -- (-7576.091) [...7 remote chains...] -- 0:00:36

29890000 -- (-7574.912) [...7 remote chains...] -- 0:00:33

29900000 -- (-7561.337) [...7 remote chains...] -- 0:00:30

Average standard deviation of split frequencies: 0.005302

29910000 -- (-7527.329) [...7 remote chains...] -- 0:00:27

29920000 -- (-7552.147) [...7 remote chains...] -- 0:00:24

29930000 -- (-7544.401) [...7 remote chains...] -- 0:00:21

29940000 -- (-7546.481) [...7 remote chains...] -- 0:00:18

29950000 -- (-7562.447) [...7 remote chains...] -- 0:00:15

Average standard deviation of split frequencies: 0.005310

29960000 -- (-7550.541) [...7 remote chains...] -- 0:00:12

29970000 -- (-7574.267) [...7 remote chains...] -- 0:00:09

29980000 -- (-7569.047) [...7 remote chains...] -- 0:00:06

29990000 -- (-7561.589) [...7 remote chains...] -- 0:00:03

30000000 -- (-7551.672) [...7 remote chains...] -- 0:00:00

Average standard deviation of split frequencies: 0.005206

Analysis completed in 2 hours 33 mins 2 seconds

Analysis used 9179.29 seconds of CPU time on processor 0

Likelihood of best state for "cold" chain of run 1 was -7501.53

Likelihood of best state for "cold" chain of run 2 was -7508.41

Acceptance rates for the moves in the "cold" chain of run 1:

With prob. (last 1000) chain accepted proposals by move

31.4 % ( 21 %) Dirichlet(Tratio{4})

24.6 % ( 25 %) Dirichlet(Tratio{5})

24.9 % ( 26 %) Dirichlet(Pi{4})

26.6 % ( 26 %) Slider(Pi{4})

22.0 % ( 28 %) Dirichlet(Pi{5})

24.8 % ( 25 %) Slider(Pi{5})

32.1 % ( 20 %) Multiplier(Alpha{1,2,3})

29.9 % ( 25 %) Multiplier(Alpha{4})

25.3 % ( 23 %) Multiplier(Alpha{5})

25.0 % ( 22 %) Dirichlet(Ratemultiplier{all})

69.6 % ( 60 %) Slider(Ratemultiplier{all})

8.3 % ( 7 %) ExtSPRClock(Tau{all},V{all})

25.3 % ( 27 %) NNIClock(Tau{all},V{all})

3.2 % ( 3 %) ParsSPRClock(Tau{all},V{all})

7.3 % ( 10 %) AddBranch(V{all})

7.2 % ( 8 %) DelBranch(V{all})

47.4 % ( 52 %) NodesliderClock(V{all})

34.7 % ( 21 %) TreeStretch(V{all})

43.8 % ( 25 %) Multiplier(Net_speciation{all})

24.5 % ( 28 %) Slider(Relative_extinction{all})

23.0 % ( 26 %) Slider(Relative_fossilization{all})

60.9 % ( 26 %) Multiplier(ILNvar{1})

59.3 % ( 25 %) Multiplier(ILNvar{2})

61.8 % ( 25 %) Multiplier(ILNvar{3})

59.2 % ( 22 %) Multiplier(ILNvar{4,5})

30.5 % ( 26 %) Multiplier(IlnBrlens{1})

30.8 % ( 14 %) Multiplier(IlnBrlens{2})

30.9 % ( 24 %) Multiplier(IlnBrlens{3})

30.1 % ( 15 %) Multiplier(IlnBrlens{4,5})

25.0 % ( 26 %) Multiplier(Clockrate{all})

Acceptance rates for the moves in the "cold" chain of run 2:

With prob. (last 1000) chain accepted proposals by move

31.4 % ( 26 %) Dirichlet(Tratio{4})

24.6 % ( 23 %) Dirichlet(Tratio{5})

24.7 % ( 25 %) Dirichlet(Pi{4})

26.5 % ( 25 %) Slider(Pi{4})

21.9 % ( 25 %) Dirichlet(Pi{5})

25.0 % ( 24 %) Slider(Pi{5})

31.8 % ( 23 %) Multiplier(Alpha{1,2,3})

29.8 % ( 26 %) Multiplier(Alpha{4})

25.4 % ( 26 %) Multiplier(Alpha{5})

25.0 % ( 24 %) Dirichlet(Ratemultiplier{all})

69.9 % ( 62 %) Slider(Ratemultiplier{all})

8.3 % ( 8 %) ExtSPRClock(Tau{all},V{all})

25.3 % ( 22 %) NNIClock(Tau{all},V{all})

3.2 % ( 2 %) ParsSPRClock(Tau{all},V{all})

7.2 % ( 7 %) AddBranch(V{all})

7.1 % ( 6 %) DelBranch(V{all})

47.4 % ( 46 %) NodesliderClock(V{all})

36.3 % ( 22 %) TreeStretch(V{all})

43.7 % ( 25 %) Multiplier(Net_speciation{all})

24.6 % ( 18 %) Slider(Relative_extinction{all})

23.2 % ( 20 %) Slider(Relative_fossilization{all})

60.8 % ( 24 %) Multiplier(ILNvar{1})

59.1 % ( 26 %) Multiplier(ILNvar{2})

62.0 % ( 24 %) Multiplier(ILNvar{3})

59.1 % ( 21 %) Multiplier(ILNvar{4,5})

30.5 % ( 27 %) Multiplier(IlnBrlens{1})

29.9 % ( 19 %) Multiplier(IlnBrlens{2})

31.1 % ( 20 %) Multiplier(IlnBrlens{3})

29.8 % ( 20 %) Multiplier(IlnBrlens{4,5})

25.1 % ( 26 %) Multiplier(Clockrate{all})

Chain swap information for run 1:

1 2 3 4

--------------------------------------

1 | 0.16 0.01 0.00

2 | 4999218 0.23 0.02

3 | 4998918 4997575 0.28

4 | 5001888 5001690 5000711

Chain swap information for run 2:

1 2 3 4

--------------------------------------

1 | 0.18 0.01 0.00

2 | 5002923 0.24 0.02

3 | 4999917 4997287 0.26

4 | 5001555 5000895 4997423

Upper diagonal: Proportion of successful state exchanges between chains

Lower diagonal: Number of attempted state exchanges between chains

Chain information:

ID -- Heat

-----------

1 -- 1.00 (cold chain)

2 -- 0.93

3 -- 0.88

4 -- 0.83

Heat = 1 / (1 + T * (ID - 1))

(where T = 0.07 is the temperature and ID is the chain number)

Setting sumt output file name to "run.te.maj"

Summarizing trees in files "run.te.run1.t" and "run.te.run2.t"

Using relative burnin ('relburnin=yes'), discarding the first 25 % of sampled trees

Writing statistics to files run.te.maj.<parts|tstat|vstat|trprobs|con>

Examining first file ...

Found one tree block in file "run.te.run1.t" with 75001 trees in last block

Expecting the same number of trees in the last tree block of all files

Tree reading status:

0 10 20 30 40 50 60 70 80 90 100

v-------v-------v-------v-------v-------v-------v-------v-------v-------v-------v

*********************************************************************************

Read a total of 150002 trees in 2 files (sampling 112502 of them)

(Each file contained 75001 trees of which 56251 were sampled)

General explanation:

In an unrooted tree, a taxon bipartition (split) is specified by removing a

branch, thereby dividing the species into those to the left and those to the

right of the branch. Here, taxa to one side of the removed branch are denoted

'.' and those to the other side are denoted '*'. Specifically, the '.' symbol

is used for the taxa on the same side as the outgroup.

In a rooted or clock tree, the tree is rooted using the model and not by

reference to an outgroup. Each bipartition therefore corresponds to a clade,

that is, a group that includes all the descendants of a particular branch in

the tree. Taxa that are included in each clade are denoted using '*', and

taxa that are not included are denoted using the '.' symbol.

The output first includes a key to all the bipartitions with frequency larger

or equal to (Minpartfreq) in at least one run. Minpartfreq is a parameter to

sumt command and currently it is set to 0.10. This is followed by a table

with statistics for the informative bipartitions (those including at least

two taxa), sorted from highest to lowest probability. For each bipartition,

the table gives the number of times the partition or split was observed in all

runs (#obs) and the posterior probability of the bipartition (Probab.), which

is the same as the split frequency. If several runs are summarized, this is

followed by the minimum split frequency (Min(s)), the maximum frequency

(Max(s)), and the standard deviation of frequencies (Stddev(s)) across runs.

The latter value should approach 0 for all bipartitions as MCMC runs converge.

This is followed by a table summarizing branch lengths, node heights (if a

clock model was used) and relaxed clock parameters (if a relaxed clock model

was used). The mean, variance, and 95 % credible interval are given for each

of these parameters. If several runs are summarized, the potential scale

reduction factor (PSRF) is also given; it should approach 1 as runs converge.

Node heights will take calibration points into account, if such points were

used in the analysis.

Note that Stddev may be unreliable if the partition is not present in all

runs (the last column indicates the number of runs that sampled the partition

if more than one run is summarized). The PSRF is not calculated at all if

the partition is not present in all runs.The PSRF is also sensitive to small

sample sizes and it should only be considered a rough guide to convergence

since some of the assumptions allowing one to interpret it as a true potential

scale reduction factor are violated in MrBayes.

List of taxa in bipartitions:

1 -- Euconodonta

2 -- Jamoytius

3 -- Euphanerops

4 -- Achanarella

5 -- Ciderius

6 -- Cornovichthys

7 -- Lasanius

8 -- Birkenia

9 -- Rhyncholepis

10 -- Myxinikela

11 -- Tethymyxine

12 -- Paramyxine_fernholmi

13 -- Eptatretus_burgeri

14 -- Eptatretus_stoutii

15 -- Myxine_glutinosa

16 -- Rubicundus_eos

17 -- Rubicundus_lopheliae

18 -- Neomyxine_biniplicata

19 -- Myxineidus

20 -- Gilpichthys

21 -- Lethenteron_camtschaticum

22 -- Petromyzon_marinus

23 -- Lampetra_fluviatilis

24 -- Geotria_australis

25 -- Ichthyomyzon_bdellium

26 -- Ichthyomyzon_castaneus

27 -- Ichthyomyzon_unicuspis

28 -- Mordacia_mordax

29 -- Mordacia_lapicida

30 -- Caspiomyzon_wagneri

31 -- Tetrapleurodon_spadiceus

32 -- Entosphenus_macrostomus

33 -- Entosphenus_minimus

34 -- Entosphenus_similis

35 -- Entosphenus_tridentatus

36 -- Eudontomyzon_danfordi

37 -- Eudontomyzon_morii

38 -- Lampetra_ayresii

39 -- Mesomyzon

40 -- Yanliaomyzon_igensdentes

41 -- Yanliaomyzon_occisor

42 -- Priscomyzon

43 -- Mayomyzon

44 -- Hardistiella

45 -- Pipiscius

Key to taxon bipartitions (saved to file "run.te.maj.parts"):

ID -- Partition

----------------------------------------------------

0 -- *********************************************

1 -- *............................................

2 -- .*...........................................

3 -- ..*..........................................

4 -- ...*.........................................

5 -- ....*........................................

6 -- .....*.......................................

7 -- ......*......................................

8 -- .......*.....................................

9 -- ........*....................................

10 -- .........*...................................

11 -- ..........*..................................

12 -- ...........*.................................

13 -- ............*................................

14 -- .............*...............................

15 -- ..............*..............................

16 -- ...............*.............................

17 -- ................*............................

18 -- .................*...........................

19 -- ..................*..........................

20 -- ...................*.........................

21 -- ....................*........................

22 -- .....................*.......................

23 -- ......................*......................

24 -- .......................*.....................

25 -- ........................*....................

26 -- .........................*...................

27 -- ..........................*..................

28 -- ...........................*.................

29 -- ............................*................

30 -- .............................*...............

31 -- ..............................*..............

32 -- ...............................*.............

33 -- ................................*............

34 -- .................................*...........

35 -- ..................................*..........

36 -- ...................................*.........

37 -- ....................................*........

38 -- .....................................*.......

39 -- ......................................*......

40 -- .......................................*.....

41 -- ........................................*....

42 -- .........................................*...

43 -- ..........................................*..

44 -- ...........................................*.

45 -- ............................................*

46 -- ..........********...........................

47 -- ...........................**................

48 -- ...........***...............................

49 -- .********************************************

50 -- ...............**............................

51 -- ..............*..*...........................

52 -- ....................*********************....

53 -- ....................***.***..*********.......

54 -- ....................******************.......

55 -- ......................*..............*.......

56 -- .......**....................................

57 -- ...................................**........

58 -- ........................***..................

59 -- .........*********...........................

60 -- ....................*************************

61 -- .**..........................................

62 -- ...........****..*...........................

63 -- ...............................*..*..........

64 -- ...........*******...........................

65 -- ....................*.*............***.......

66 -- .....................*..***..................

67 -- .....................*..***..*...............

68 -- ....................*.*.......********.......

69 -- .**...***....................................

70 -- ......***....................................

71 -- ....................***.**************.......

72 -- ...............................****..........

73 -- ...........**................................

74 -- ...***...************************************

75 -- ..............................*****..........

76 -- ....................*********************..*.

77 -- ....................******************.**....

78 -- ...**........................................

79 -- ...............................*.**..........

80 -- ....................******************..*....

81 -- ....................*..............**........

82 -- ........................*.*..................

83 -- ........................**...................

84 -- ....................*********************.**.

85 -- ..................**.........................

86 -- .........************************************

87 -- ...***.......................................

88 -- ....................*********************.***

89 -- ...........*.*...............................

90 -- .......................................**....

91 -- ...*.*.......................................

92 -- ....................*.*..............*.......

93 -- ....................************************.

94 -- .........*********.*.........................

95 -- ....................*******************......

96 -- ......................*............***.......

97 -- .........*********.**************************

98 -- ................................**...........

99 -- ....................**********************...

100 -- .........***********.........................

101 -- .........................**..................

102 -- ..........................................**.

103 -- ..........................................*.*

104 -- ....................*.*.......*....***.......

105 -- ....................*******************.*....

106 -- .....*............*..........................

107 -- ...................**************************

108 -- .**...*......................................

109 -- ...***............*..........................

110 -- ..............................**..*..........

111 -- ......................................***....

112 -- ....................*******..*********.......

113 -- ...............................**.*..........

114 -- ..................***************************

115 -- .........**********..........................

116 -- .......................*...**................

117 -- ....................*.*......*********.......

118 -- ....................*.*.......*****..*.......

119 -- .********....................................

120 -- ..........................................***

121 -- .....*...************************************

122 -- .....................*.......*...............

123 -- ....................**********************.*.

----------------------------------------------------

Summary statistics for informative taxon bipartitions (clades)

(saved to file "run.te.maj.tstat"):

ID #obs Probab. Sd(s)+ Min(s) Max(s) Nruns

-------------------------------------------------------------------

46 112502 1.000000 0.000000 1.000000 1.000000 2

47 112502 1.000000 0.000000 1.000000 1.000000 2

48 112502 1.000000 0.000000 1.000000 1.000000 2

49 112502 1.000000 0.000000 1.000000 1.000000 2

50 112482 0.999822 0.000226 0.999662 0.999982 2

51 112467 0.999689 0.000113 0.999609 0.999769 2

52 112447 0.999511 0.000239 0.999342 0.999680 2

53 112303 0.998231 0.000314 0.998009 0.998453 2

54 112251 0.997769 0.000189 0.997636 0.997902 2

55 112138 0.996765 0.001031 0.996036 0.997493 2

56 111927 0.994889 0.000641 0.994436 0.995342 2

57 111094 0.987485 0.001282 0.986578 0.988391 2

58 105687 0.939423 0.001270 0.938526 0.940321 2

59 105633 0.938943 0.001244 0.938063 0.939823 2

60 103466 0.919681 0.001911 0.918330 0.921033 2

61 102259 0.908953 0.006122 0.904624 0.913282 2

62 100885 0.896740 0.011653 0.888500 0.904979 2

63 98871 0.878838 0.001571 0.877727 0.879949 2

64 97230 0.864251 0.009780 0.857336 0.871167 2

65 93968 0.835256 0.008070 0.829550 0.840963 2

66 91444 0.812821 0.006662 0.808110 0.817532 2

67 90103 0.800901 0.004513 0.797710 0.804092 2

68 87968 0.781924 0.002087 0.780448 0.783399 2

69 85161 0.756973 0.016027 0.745640 0.768306 2

70 84105 0.747587 0.005594 0.743631 0.751542 2

71 81870 0.727720 0.015839 0.716521 0.738920 2

72 77879 0.692245 0.003155 0.690014 0.694477 2

73 76244 0.677712 0.009554 0.670957 0.684468 2

74 75183 0.668281 0.026939 0.649233 0.687330 2

75 68582 0.609607 0.000352 0.609358 0.609856 2

76 67716 0.601909 0.012219 0.593269 0.610549 2

77 63618 0.565483 0.011691 0.557217 0.573750 2

78 53787 0.478098 0.007379 0.472880 0.483316 2

79 52208 0.464063 0.004827 0.460650 0.467476 2

80 46065 0.409459 0.004010 0.406624 0.412295 2

81 45783 0.406953 0.001999 0.405539 0.408366 2

82 43618 0.387709 0.004375 0.384615 0.390802 2

83 42477 0.377567 0.003633 0.374998 0.380135 2

84 41442 0.368367 0.009528 0.361629 0.375104 2

85 37573 0.333976 0.004940 0.330483 0.337470 2

86 37352 0.332012 0.016719 0.320190 0.343834 2

87 37262 0.331212 0.007190 0.326128 0.336296 2

88 35202 0.312901 0.017121 0.300795 0.325008 2

89 35126 0.312226 0.009805 0.305292 0.319159 2

90 34480 0.306483 0.004249 0.303479 0.309488 2

91 34041 0.302581 0.004337 0.299515 0.305648 2

92 32242 0.286590 0.002539 0.284795 0.288386 2

93 31578 0.280688 0.010358 0.273364 0.288013 2

94 28786 0.255871 0.002288 0.254253 0.257489 2

95 27536 0.244760 0.000805 0.244191 0.245329 2

96 27495 0.244396 0.008485 0.238396 0.250396 2

97 26080 0.231818 0.003796 0.229134 0.234502 2

98 25885 0.230085 0.003407 0.227676 0.232494 2

99 25747 0.228858 0.007354 0.223658 0.234058 2

100 25712 0.228547 0.007341 0.223356 0.233738 2

101 24891 0.221249 0.000817 0.220672 0.221827 2

102 21688 0.192779 0.005254 0.189063 0.196494 2

103 21623 0.192201 0.001798 0.190930 0.193472 2

104 20881 0.185606 0.006801 0.180797 0.190414 2

105 20806 0.184939 0.004073 0.182059 0.187819 2

106 20530 0.182486 0.003042 0.180335 0.184637 2

107 20246 0.179961 0.001684 0.178770 0.181152 2

108 18650 0.165775 0.004752 0.162415 0.169135 2

109 17876 0.158895 0.002615 0.157046 0.160744 2

110 17345 0.154175 0.000013 0.154166 0.154184 2

111 16310 0.144975 0.004073 0.142095 0.147855 2

112 15829 0.140700 0.000465 0.140371 0.141029 2

113 15520 0.137953 0.001131 0.137153 0.138753 2

114 15427 0.137126 0.000365 0.136869 0.137384 2

115 15344 0.136389 0.005355 0.132602 0.140175 2

116 14780 0.131375 0.016317 0.119838 0.142913 2

117 14603 0.129802 0.003130 0.127589 0.132015 2

118 13651 0.121340 0.005342 0.117562 0.125118 2

119 13291 0.118140 0.017687 0.105634 0.130647 2

120 13086 0.116318 0.000151 0.116211 0.116425 2

121 13002 0.115571 0.003796 0.112887 0.118256 2

122 12552 0.111571 0.004852 0.108140 0.115002 2

123 11569 0.102834 0.005795 0.098736 0.106931 2

-------------------------------------------------------------------

+ Convergence diagnostic (standard deviation of split frequencies)

should approach 0.0 as runs converge.

Summary statistics for branch and node parameters

(saved to file "run.te.maj.vstat"):

95% HPD Interval

--------------------

Parameter Mean Variance Lower Upper Median PSRF+ Nruns

------------------------------------------------------------------------------------------------------

length{all}[1] 0.230897 0.018137 0.004061 0.486892 0.207148 1.001 2

length{all}[2] 0.020679 0.002768 0.000000 0.131083 0.000000 1.000 2

length{all}[3] 0.234319 0.006327 0.104474 0.414164 0.221727 1.000 2

length{all}[4] 0.142900 0.006844 0.000000 0.282846 0.137322 1.000 2

length{all}[5] 0.029983 0.004592 0.000000 0.172771 0.000000 1.001 2

length{all}[6] 0.161876 0.018943 0.000000 0.424137 0.132726 1.001 2

length{all}[7] 0.142863 0.005188 0.037558 0.294240 0.128463 1.000 2

length{all}[8] 0.001900 0.000067 0.000000 0.013622 0.000000 1.001 2

length{all}[9] 0.013671 0.000077 0.005672 0.027643 0.011730 1.000 2

length{all}[10] 0.030390 0.010991 0.000000 0.225770 0.000000 1.000 2

length{all}[11] 0.005084 0.000423 0.000000 0.036546 0.000000 1.000 2

length{all}[12] 0.037451 0.000221 0.013325 0.067000 0.034869 1.003 2

length{all}[13] 0.043549 0.000356 0.013542 0.081188 0.040043 1.003 2

length{all}[14] 0.049591 0.000407 0.016912 0.089608 0.046283 1.001 2

length{all}[15] 0.116430 0.001763 0.045184 0.200597 0.110642 1.000 2

length{all}[16] 0.021094 0.000437 0.000186 0.059968 0.014902 1.000 2

length{all}[17] 0.021093 0.000437 0.000186 0.059968 0.014902 1.000 2

length{all}[18] 0.116425 0.001762 0.045181 0.200576 0.110641 1.000 2

length{all}[19] 0.313996 0.032292 0.029841 0.675308 0.281387 1.000 2

length{all}[20] 0.305863 0.030520 0.000000 0.621571 0.286369 1.000 2

length{all}[21] 0.024779 0.000105 0.006442 0.044369 0.023634 1.001 2

length{all}[22] 0.029196 0.000299 0.003883 0.063165 0.025344 1.000 2

length{all}[23] 0.008820 0.000039 0.000372 0.020878 0.007369 1.001 2

length{all}[24] 0.252382 0.005523 0.122709 0.402047 0.241872 1.000 2

length{all}[25] 0.005758 0.000028 0.000020 0.015954 0.004240 1.000 2

length{all}[26] 0.007048 0.000041 0.000045 0.019157 0.005251 1.000 2

length{all}[27] 0.006931 0.000040 0.000021 0.018790 0.005166 1.000 2

length{all}[28] 0.019639 0.000244 0.001287 0.050301 0.015363 1.000 2

length{all}[29] 0.019639 0.000244 0.001287 0.050301 0.015363 1.000 2

length{all}[30] 0.050736 0.000688 0.008712 0.101740 0.046036 1.000 2

length{all}[31] 0.033459 0.000420 0.001636 0.071080 0.030571 1.000 2

length{all}[32] 0.004175 0.000027 0.000000 0.013961 0.002445 1.000 2

length{all}[33] 0.020761 0.000219 0.001638 0.050312 0.016855 1.000 2

length{all}[34] 0.015532 0.000148 0.000326 0.039557 0.012235 1.000 2

length{all}[35] 0.004430 0.000033 0.000000 0.015061 0.002519 1.000 2

length{all}[36] 0.009931 0.000093 0.000246 0.026413 0.007313 1.001 2

length{all}[37] 0.009953 0.000096 0.000246 0.026415 0.007312 1.001 2

length{all}[38] 0.008821 0.000039 0.000360 0.020828 0.007369 1.001 2

length{all}[39] 0.186089 0.011233 0.020573 0.395858 0.167202 1.000 2

length{all}[40] 0.001091 0.000028 0.000000 0.006572 0.000000 1.000 2

length{all}[41] 0.007927 0.000111 0.000000 0.025038 0.000000 1.000 2

length{all}[42] 0.074971 0.004977 0.000000 0.205531 0.065933 1.000 2

length{all}[43] 0.177844 0.008761 0.000000 0.348033 0.164770 1.000 2

length{all}[44] 0.074543 0.009028 0.000000 0.263247 0.033361 1.000 2

length{all}[45] 0.245660 0.013839 0.053903 0.477372 0.228612 1.000 2

length{all}[46] 0.744293 0.044576 0.371517 1.167416 0.713793 1.000 2

length{all}[47] 0.192614 0.004222 0.082982 0.323352 0.182353 1.000 2

length{all}[48] 0.137717 0.002754 0.043029 0.242177 0.132021 1.000 2

length{all}[49] 0.135870 0.011604 0.000002 0.342751 0.112086 1.000 2

length{all}[50] 0.239394 0.004842 0.111861 0.379346 0.232457 1.000 2

length{all}[51] 0.077629 0.001558 0.016745 0.156833 0.069940 1.000 2

length{all}[52] 0.526697 0.034034 0.208518 0.909239 0.502194 1.000 2

length{all}[53] 0.120619 0.002716 0.033170 0.226599 0.113074 1.000 2

length{all}[54] 0.293442 0.019168 0.042534 0.558519 0.275259 1.000 2

length{all}[55] 0.018486 0.000092 0.002348 0.036745 0.017042 1.001 2

length{all}[56] 0.132033 0.007053 0.016420 0.300076 0.112482 1.000 2

length{all}[57] 0.019020 0.000222 0.000864 0.048535 0.015075 1.001 2

length{all}[58] 0.021699 0.000276 0.000000 0.053012 0.017659 1.000 2

length{all}[59] 0.404726 0.044871 0.063049 0.831574 0.371122 1.000 2

length{all}[60] 0.192011 0.012927 0.019739 0.420041 0.168710 1.000 2

length{all}[61] 0.192139 0.010918 0.025258 0.401838 0.174602 1.000 2

length{all}[62] 0.078771 0.002638 0.000016 0.173280 0.068750 1.000 2

length{all}[63] 0.011692 0.000113 0.000004 0.032376 0.008645 1.000 2

length{all}[64] 0.079568 0.004331 0.000001 0.206019 0.064313 1.001 2

length{all}[65] 0.022722 0.000282 0.000551 0.056191 0.018445 1.000 2

length{all}[66] 0.029965 0.000491 0.000000 0.072787 0.024614 1.000 2

length{all}[67] 0.036328 0.000460 0.000003 0.075623 0.033143 1.000 2

length{all}[68] 0.033691 0.000416 0.000030 0.071029 0.030551 1.000 2

length{all}[69] 0.195010 0.012995 0.005455 0.412294 0.175790 1.000 2

length{all}[70] 0.133929 0.009249 0.000001 0.316547 0.113842 1.000 2

length{all}[71] 0.066471 0.002292 0.000007 0.158497 0.055072 1.001 2

length{all}[72] 0.019802 0.000256 0.000000 0.050694 0.015619 1.001 2

length{all}[73] 0.018051 0.000170 0.000649 0.043724 0.014864 1.000 2

length{all}[74] 0.202210 0.015987 0.000332 0.438150 0.181163 1.000 2

length{all}[75] 0.020532 0.000276 0.000000 0.052158 0.016354 1.000 2

length{all}[76] 0.136999 0.006909 0.000740 0.291765 0.123488 1.001 2

length{all}[77] 0.104325 0.007218 0.000004 0.264433 0.084341 1.000 2

length{all}[78] 0.151390 0.011759 0.000012 0.359014 0.128010 1.001 2

length{all}[79] 0.012225 0.000145 0.000002 0.035550 0.008579 1.000 2

length{all}[80] 0.015683 0.000050 0.000000 0.026128 0.015526 1.000 2

length{all}[81] 0.009848 0.000059 0.000001 0.024701 0.008261 1.000 2

length{all}[82] 0.005221 0.000034 0.000000 0.016052 0.003431 1.000 2

length{all}[83] 0.005142 0.000034 0.000000 0.016010 0.003338 1.000 2

length{all}[84] 0.088141 0.004602 0.000004 0.216979 0.074282 1.000 2

length{all}[85] 0.235603 0.024727 0.000008 0.526628 0.211301 1.000 2

length{all}[86] 0.197073 0.022404 0.000018 0.490709 0.161798 1.003 2

length{all}[87] 0.150899 0.012538 0.000010 0.364552 0.127500 1.000 2

length{all}[88] 0.066515 0.002964 0.000004 0.172951 0.054255 1.000 2

length{all}[89] 0.019830 0.000172 0.000011 0.045080 0.017119 1.000 2

length{all}[90] 0.040944 0.001513 0.000003 0.116674 0.030014 1.000 2

length{all}[91] 0.107971 0.007306 0.000004 0.276806 0.086922 1.000 2

length{all}[92] 0.010601 0.000115 0.000000 0.031771 0.007271 1.001 2

length{all}[93] 0.097282 0.010317 0.000007 0.299998 0.065174 1.000 2

length{all}[94] 0.167395 0.017087 0.000002 0.418697 0.139966 1.000 2

length{all}[95] 0.051708 0.001892 0.000006 0.132193 0.041940 1.000 2

length{all}[96] 0.006632 0.000034 0.000001 0.017817 0.005134 1.000 2

length{all}[97] 0.184727 0.020134 0.000010 0.463461 0.152647 1.001 2

length{all}[98] 0.008473 0.000083 0.000002 0.026185 0.005606 1.000 2

length{all}[99] 0.099468 0.004138 0.000027 0.220738 0.087157 1.000 2

length{all}[100] 0.168798 0.018644 0.000020 0.432366 0.138117 1.000 2

length{all}[101] 0.003867 0.000021 0.000000 0.012718 0.002349 1.000 2

length{all}[102] 0.096991 0.005719 0.000004 0.243557 0.079785 1.000 2

length{all}[103] 0.069109 0.003978 0.000002 0.192984 0.051140 1.001 2

length{all}[104] 0.013916 0.000173 0.000002 0.039635 0.010146 1.000 2

length{all}[105] 0.015448 0.000064 0.000015 0.026783 0.015726 1.002 2

length{all}[106] 0.178400 0.016948 0.000005 0.427008 0.150481 1.000 2

length{all}[107] 0.121999 0.010949 0.000002 0.328669 0.095056 1.000 2

length{all}[108] 0.085757 0.005470 0.000013 0.227378 0.067706 1.000 2

length{all}[109] 0.164736 0.015213 0.000024 0.400202 0.140128 1.000 2

length{all}[110] 0.011346 0.000118 0.000009 0.032624 0.008011 1.003 2

length{all}[111] 0.062228 0.003855 0.000011 0.181705 0.043972 1.000 2

length{all}[112] 0.058880 0.002619 0.000015 0.159320 0.046168 1.000 2

length{all}[113] 0.007679 0.000072 0.000000 0.024499 0.005058 1.000 2

length{all}[114] 0.120362 0.009713 0.000098 0.310259 0.096618 1.000 2

length{all}[115] 0.186519 0.020414 0.000049 0.462243 0.156557 1.002 2

length{all}[116] 0.045205 0.001408 0.000008 0.120823 0.035989 1.000 2

length{all}[117] 0.020854 0.000276 0.000006 0.052469 0.017159 1.000 2

length{all}[118] 0.019550 0.000222 0.000033 0.048486 0.015708 1.000 2

length{all}[119] 0.169075 0.010732 0.000167 0.363689 0.151950 1.002 2

length{all}[120] 0.074313 0.004113 0.000006 0.196510 0.058460 1.000 2

length{all}[121] 0.121381 0.011927 0.000003 0.335115 0.090852 1.000 2

length{all}[122] 0.013299 0.000165 0.000001 0.037327 0.009776 1.003 2

length{all}[123] 0.049836 0.002196 0.000007 0.141281 0.036527 1.000 2

height{all}[0] 2.065942 0.266486 1.170176 3.092430 1.990418 1.000 2

height{all}[1] 1.835045 0.219084 1.043306 2.781548 1.765154 1.000 2

height{all}[2] 1.492023 0.144833 0.848283 2.261598 1.435197 1.000 2

height{all}[3] 1.267911 0.104591 0.720865 1.921891 1.219621 1.000 2

height{all}[4] 1.319313 0.113243 0.750089 1.999805 1.269065 1.000 2

height{all}[5] 1.480372 0.142580 0.841658 2.243938 1.423990 1.000 2

height{all}[6] 1.319313 0.113243 0.750089 1.999805 1.269065 1.000 2

height{all}[7] 1.467350 0.140083 0.834255 2.224199 1.411464 1.000 2

height{all}[8] 1.492023 0.144833 0.848283 2.261598 1.435197 1.000 2

height{all}[9] 1.480201 0.142547 0.841561 2.243678 1.423825 1.000 2

height{all}[10] 1.062304 0.073420 0.603968 1.610233 1.021845 1.000 2

height{all}[11] 0.325545 0.006895 0.185087 0.493459 0.313146 1.000 2

height{all}[12] 0.000000 0.000000 0.000000 0.000000 0.000000 1.000 2

height{all}[13] 0.000000 0.000000 0.000000 0.000000 0.000000 1.000 2

height{all}[14] 0.000000 0.000000 0.000000 0.000000 0.000000 1.000 2

height{all}[15] 0.000000 0.000000 0.000000 0.000000 0.000000 1.000 2

height{all}[16] 0.000000 0.000000 0.000000 0.000000 0.000000 1.000 2

height{all}[17] 0.000000 0.000000 0.000000 0.000000 0.000000 1.000 2

height{all}[18] 0.000000 0.000000 0.000000 0.000000 0.000000 1.000 2

height{all}[19] 1.062304 0.073420 0.603968 1.610233 1.021845 1.000 2

height{all}[20] 1.062304 0.073420 0.603968 1.610233 1.021845 1.000 2

height{all}[21] 0.000000 0.000000 0.000000 0.000000 0.000000 1.000 2

height{all}[22] 0.000000 0.000000 0.000000 0.000000 0.000000 1.000 2

height{all}[23] 0.000000 0.000000 0.000000 0.000000 0.000000 1.000 2

height{all}[24] 0.000000 0.000000 0.000000 0.000000 0.000000 1.000 2

height{all}[25] 0.000000 0.000000 0.000000 0.000000 0.000000 1.000 2

height{all}[26] 0.000000 0.000000 0.000000 0.000000 0.000000 1.000 2

height{all}[27] 0.000000 0.000000 0.000000 0.000000 0.000000 1.000 2

height{all}[28] 0.000000 0.000000 0.000000 0.000000 0.000000 1.000 2

height{all}[29] 0.000000 0.000000 0.000000 0.000000 0.000000 1.000 2

height{all}[30] 0.000000 0.000000 0.000000 0.000000 0.000000 1.000 2

height{all}[31] 0.000000 0.000000 0.000000 0.000000 0.000000 1.000 2

height{all}[32] 0.000000 0.000000 0.000000 0.000000 0.000000 1.000 2

height{all}[33] 0.000000 0.000000 0.000000 0.000000 0.000000 1.000 2

height{all}[34] 0.000000 0.000000 0.000000 0.000000 0.000000 1.000 2

height{all}[35] 0.000000 0.000000 0.000000 0.000000 0.000000 1.000 2

height{all}[36] 0.000000 0.000000 0.000000 0.000000 0.000000 1.000 2

height{all}[37] 0.000000 0.000000 0.000000 0.000000 0.000000 1.000 2

height{all}[38] 0.000000 0.000000 0.000000 0.000000 0.000000 1.000 2

height{all}[39] 0.428348 0.011937 0.243535 0.649287 0.412034 1.000 2

height{all}[40] 0.558566 0.020299 0.317570 0.846671 0.537292 1.000 2

height{all}[41] 0.541432 0.019072 0.307829 0.820699 0.520811 1.000 2

height{all}[42] 1.233643 0.099014 0.701382 1.869948 1.186658 1.000 2

height{all}[43] 1.062304 0.073420 0.603968 1.610233 1.021845 1.000 2

height{all}[44] 1.096572 0.078233 0.623451 1.662176 1.054807 1.000 2

height{all}[45] 1.062304 0.073420 0.603968 1.610233 1.021845 1.000 2

height{all}[46] 0.335884 0.007109 0.197146 0.506492 0.322022 1.001 2

height{all}[47] 0.019639 0.000244 0.001287 0.050301 0.015363 1.000 2

height{all}[48] 0.055876 0.000392 0.024433 0.096293 0.052336 1.002 2

height{all}[49] 1.930072 0.228363 1.121930 2.895695 1.858060 1.000 2

height{all}[50] 0.021056 0.000429 0.000096 0.059826 0.014900 1.000 2

height{all}[51] 0.116399 0.001760 0.045333 0.200597 0.110629 1.000 2

height{all}[52] 0.640543 0.030053 0.349966 0.982424 0.613132 1.000 2

height{all}[53] 0.089432 0.000583 0.050648 0.139057 0.085435 1.001 2

height{all}[54] 0.266266 0.005272 0.144253 0.410906 0.255360 1.000 2

height{all}[55] 0.008754 0.000037 0.000471 0.020696 0.007348 1.000 2

height{all}[56] 1.494027 0.144957 0.848516 2.262118 1.437322 1.000 2

height{all}[57] 0.009397 0.000066 0.000246 0.024216 0.007219 1.001 2

height{all}[58] 0.009326 0.000044 0.000700 0.022032 0.007693 1.000 2

height{all}[59] 1.071255 0.076343 0.595616 1.616308 1.029784 1.000 2

height{all}[60] 1.363387 0.113956 0.784617 2.038019 1.313212 1.000 2

height{all}[61] 1.503487 0.148341 0.856606 2.287222 1.446342 1.000 2

height{all}[62] 0.190477 0.002618 0.100838 0.293333 0.184223 1.000 2

height{all}[63] 0.003420 0.000016 0.000000 0.011199 0.002083 1.000 2

height{all}[64] 0.259326 0.004142 0.144463 0.388515 0.251531 1.000 2

height{all}[65] 0.030579 0.000113 0.013024 0.051640 0.028769 1.002 2

height{all}[66] 0.027760 0.000228 0.005912 0.058272 0.024450 1.000 2

height{all}[67] 0.047526 0.000394 0.015198 0.086714 0.044222 1.000 2

height{all}[68] 0.052568 0.000290 0.023828 0.086343 0.049998 1.001 2

height{all}[69] 1.716139 0.186048 0.971878 2.568879 1.651655 1.000 2

height{all}[70] 1.604642 0.164468 0.907292 2.407140 1.543101 1.000 2

height{all}[71] 0.201300 0.002973 0.106607 0.309170 0.193235 1.000 2

height{all}[72] 0.021355 0.000141 0.003674 0.044677 0.018699 1.000 2

height{all}[73] 0.037395 0.000229 0.012533 0.066943 0.034659 1.002 2

height{all}[74] 1.736127 0.181150 0.999873 2.569306 1.672901 1.000 2

height{all}[75] 0.030791 0.000216 0.007601 0.059580 0.028151 1.000 2

height{all}[76] 1.117185 0.082345 0.628800 1.695158 1.073110 1.000 2

height{all}[77] 0.565675 0.020396 0.319704 0.854860 0.543636 1.000 2

height{all}[78] 1.466379 0.140564 0.826439 2.223546 1.411161 1.001 2

height{all}[79] 0.011515 0.000066 0.000670 0.027324 0.009488 1.000 2

height{all}[80] 0.545492 0.018663 0.313206 0.824493 0.524640 1.000 2

height{all}[81] 0.019806 0.000075 0.005471 0.036843 0.018569 1.001 2

height{all}[82] 0.004600 0.000017 0.000019 0.012407 0.003466 1.001 2

height{all}[83] 0.004621 0.000017 0.000039 0.012600 0.003448 1.000 2

height{all}[84] 1.224442 0.095924 0.691638 1.848235 1.177072 1.000 2

height{all}[85] 1.272257 0.109835 0.695221 1.922200 1.221602 1.000 2

height{all}[86] 1.611846 0.152021 0.967480 2.402860 1.551078 1.000 2

height{all}[87] 1.529895 0.149062 0.851985 2.286484 1.473265 1.000 2

height{all}[88] 1.299717 0.100323 0.753522 1.932502 1.255849 1.000 2

height{all}[89] 0.037150 0.000194 0.012516 0.063253 0.034964 1.006 2

height{all}[90] 0.546075 0.020397 0.302988 0.829487 0.524532 1.000 2

height{all}[91] 1.440227 0.130829 0.815522 2.161818 1.384480 1.000 2

height{all}[92] 0.026514 0.000089 0.010515 0.044168 0.025232 1.007 2

height{all}[93] 1.316366 0.112561 0.745711 1.988170 1.263930 1.000 2

height{all}[94] 1.351615 0.121414 0.757991 2.060625 1.297376 1.000 2

height{all}[95] 0.533302 0.019158 0.297532 0.798752 0.513295 1.002 2

height{all}[96] 0.022625 0.000073 0.008033 0.039522 0.021339 1.001 2

height{all}[97] 1.569153 0.153680 0.912899 2.349652 1.506066 1.000 2

height{all}[98] 0.014664 0.000095 0.001618 0.033829 0.012221 1.000 2

height{all}[99] 1.230912 0.103250 0.711045 1.888687 1.182699 1.000 2

height{all}[100] 1.429878 0.127379 0.822261 2.147093 1.376427 1.000 2

height{all}[101] 0.005466 0.000019 0.000135 0.013989 0.004316 1.000 2

height{all}[102] 1.213320 0.100198 0.692965 1.850306 1.162482 1.000 2

height{all}[103] 1.248742 0.097684 0.715806 1.874257 1.204588 1.000 2

height{all}[104] 0.042755 0.000226 0.018044 0.072672 0.040417 1.000 2

height{all}[105] 0.571249 0.020065 0.324011 0.834866 0.551410 1.003 2

height{all}[106] 1.368201 0.127202 0.756484 2.084418 1.317961 1.000 2

height{all}[107] 1.480188 0.131687 0.853185 2.216389 1.427128 1.000 2

height{all}[108] 1.617915 0.166821 0.919001 2.428177 1.559530 1.001 2

height{all}[109] 1.562940 0.164385 0.853208 2.362687 1.503761 1.000 2

height{all}[110] 0.013809 0.000093 0.001233 0.033142 0.011370 1.000 2

height{all}[111] 0.556820 0.021269 0.309884 0.851778 0.533164 1.000 2

height{all}[112] 0.221235 0.003296 0.123601 0.328966 0.214193 1.001 2

height{all}[113] 0.014179 0.000085 0.001745 0.032518 0.011892 1.000 2

height{all}[114] 1.497179 0.135523 0.858435 2.212063 1.444569 1.000 2

height{all}[115] 1.329129 0.113943 0.731059 1.977709 1.282679 1.000 2

height{all}[116] 0.200479 0.003459 0.099106 0.321076 0.193585 1.001 2

height{all}[117] 0.068888 0.000428 0.030933 0.109756 0.066450 1.002 2

height{all}[118] 0.039593 0.000191 0.017355 0.067482 0.036852 1.001 2

height{all}[119] 1.755417 0.180405 0.997933 2.582788 1.693728 1.001 2

height{all}[120] 1.295867 0.107009 0.751405 1.951319 1.244922 1.000 2

height{all}[121] 1.664141 0.161186 0.987112 2.490860 1.599117 1.000 2

height{all}[122] 0.029844 0.000243 0.005997 0.061407 0.026732 1.001 2

height{all}[123] 1.283070 0.102372 0.740970 1.932439 1.238368 1.000 2

age{all}[0] 604.922016 1586.564804 535.553387 680.241385 598.638267 1.002 2

age{all}[1] 535.500020 0.000000 535.499919 535.500123 535.500020 1.000 2

age{all}[2] 435.400020 0.000000 435.399931 435.400110 435.400020 1.000 2

age{all}[3] 370.000020 0.000000 369.999937 370.000103 370.000020 1.000 2

age{all}[4] 385.000020 0.000000 384.999940 385.000102 385.000019 1.000 2

age{all}[5] 432.000020 0.000000 431.999935 432.000106 432.000020 1.000 2

age{all}[6] 385.000020 0.000000 384.999941 385.000101 385.000019 1.000 2

age{all}[7] 428.200020 0.000000 428.199931 428.200108 428.200019 1.000 2

age{all}[8] 435.400020 0.000000 435.399931 435.400109 435.400019 1.000 2

age{all}[9] 431.950020 0.000000 431.949932 431.950109 431.950019 1.000 2

age{all}[10] 310.000020 0.000000 309.999956 310.000088 310.000019 1.000 2

age{all}[11] 95.000020 0.000000 94.999985 95.000066 95.000016 1.000 2

age{all}[12] 0.000020 0.000000 0.000000 0.000062 0.000014 1.000 2

age{all}[13] 0.000020 0.000000 0.000000 0.000062 0.000014 1.000 2

age{all}[14] 0.000020 0.000000 0.000000 0.000062 0.000014 1.000 2

age{all}[15] 0.000020 0.000000 0.000000 0.000062 0.000015 1.000 2

age{all}[16] 0.000020 0.000000 0.000000 0.000062 0.000015 1.000 2

age{all}[17] 0.000020 0.000000 0.000000 0.000062 0.000015 1.000 2

age{all}[18] 0.000020 0.000000 0.000000 0.000062 0.000015 1.000 2

age{all}[19] 310.000020 0.000000 309.999950 310.000092 310.000019 1.000 2

age{all}[20] 310.000020 0.000000 309.999952 310.000090 310.000019 1.000 2

age{all}[21] 0.000020 0.000000 0.000000 0.000061 0.000014 1.000 2

age{all}[22] 0.000020 0.000000 0.000000 0.000061 0.000014 1.000 2

age{all}[23] 0.000020 0.000000 0.000000 0.000061 0.000014 1.000 2

age{all}[24] 0.000020 0.000000 0.000000 0.000061 0.000015 1.000 2

age{all}[25] 0.000020 0.000000 0.000000 0.000061 0.000014 1.000 2

age{all}[26] 0.000020 0.000000 0.000000 0.000061 0.000014 1.000 2

age{all}[27] 0.000020 0.000000 0.000000 0.000061 0.000014 1.000 2

age{all}[28] 0.000020 0.000000 0.000000 0.000062 0.000015 1.000 2

age{all}[29] 0.000020 0.000000 0.000000 0.000062 0.000015 1.000 2

age{all}[30] 0.000020 0.000000 0.000000 0.000061 0.000014 1.000 2

age{all}[31] 0.000020 0.000000 0.000000 0.000061 0.000014 1.000 2

age{all}[32] 0.000020 0.000000 0.000000 0.000060 0.000014 1.000 2

age{all}[33] 0.000020 0.000000 0.000000 0.000060 0.000014 1.000 2

age{all}[34] 0.000020 0.000000 0.000000 0.000060 0.000014 1.000 2

age{all}[35] 0.000020 0.000000 0.000000 0.000060 0.000014 1.000 2

age{all}[36] 0.000020 0.000000 0.000000 0.000060 0.000014 1.000 2

age{all}[37] 0.000020 0.000000 0.000000 0.000060 0.000014 1.000 2

age{all}[38] 0.000020 0.000000 0.000000 0.000061 0.000014 1.000 2

age{all}[39] 125.000020 0.000000 124.999976 125.000069 125.000018 1.000 2

age{all}[40] 163.000020 0.000000 162.999974 163.000069 163.000018 1.000 2

age{all}[41] 158.000020 0.000000 157.999975 158.000068 158.000018 1.000 2

age{all}[42] 360.000020 0.000000 359.999949 360.000095 360.000019 1.000 2

age{all}[43] 310.000020 0.000000 309.999953 310.000090 310.000019 1.000 2

age{all}[44] 320.000020 0.000000 319.999954 320.000090 320.000019 1.000 2

age{all}[45] 310.000020 0.000000 309.999954 310.000092 310.000019 1.000 2

age{all}[46] 98.550997 94.286352 94.999970 119.168785 95.000022 1.000 2

age{all}[47] 5.907731 22.081822 0.388212 15.263551 4.598273 1.000 2

age{all}[48] 16.930560 38.846171 6.495838 29.495135 15.888508 1.002 2

age{all}[49] 565.545650 1476.493904 496.457013 642.509688 561.899966 1.002 2

age{all}[50] 6.370155 39.884838 0.033957 18.281932 4.514850 1.000 2

age{all}[51] 35.541257 204.940088 11.771068 62.837297 33.461798 1.000 2

age{all}[52] 187.754362 604.909690 162.999947 236.122921 182.092818 1.000 2

age{all}[53] 27.125613 64.614648 13.465493 43.583233 25.855064 1.001 2

age{all}[54] 80.526193 534.404118 39.863055 126.906975 77.920768 1.000 2

age{all}[55] 2.649552 3.477914 0.119346 6.281899 2.213898 1.001 2

age{all}[56] 435.982638 6.240101 435.399816 439.578260 435.400027 1.001 2

age{all}[57] 2.837893 6.051057 0.079991 7.355942 2.167693 1.001 2

age{all}[58] 2.813717 4.086346 0.162864 6.634216 2.311812 1.000 2

age{all}[59] 312.884817 154.210090 309.999884 329.981693 310.000024 1.000 2

age{all}[60] 400.495189 576.240366 359.999925 444.326122 397.718013 1.001 2

age{all}[61] 439.505833 127.087913 435.399837 463.006935 435.400039 1.000 2

age{all}[62] 57.346343 255.458809 28.973296 88.020969 55.994354 1.000 2

age{all}[63] 1.032720 1.494617 0.000012 3.387033 0.628863 1.000 2

age{all}[64] 75.085549 203.577795 46.419711 94.999446 76.642804 1.001 2

age{all}[65] 9.316673 12.417697 3.489374 16.261234 8.764578 1.002 2

age{all}[66] 8.401282 21.084269 1.514335 17.569499 7.386597 1.000 2

age{all}[67] 14.418791 39.337706 4.379502 27.118451 13.269401 1.001 2

age{all}[68] 16.004332 31.273685 6.660585 27.348108 15.119710 1.001 2

age{all}[69] 502.374875 721.468151 457.206752 555.672608 498.234531 1.000 2

age{all}[70] 468.176340 320.747048 440.930619 504.008051 464.761808 1.000 2

age{all}[71] 60.649451 340.117152 27.889700 96.423824 58.406726 1.000 2

age{all}[72] 6.502159 13.865400 1.099400 13.973698 5.642207 1.000 2

age{all}[73] 11.311854 23.179869 3.463660 20.281152 10.578138 1.002 2

age{all}[74] 503.694970 1267.268379 441.032416 574.287625 499.632545 1.001 2

age{all}[75] 9.323443 21.081907 2.079933 18.400612 8.432360 1.000 2

age{all}[76] 326.745698 202.440278 319.999884 359.044475 320.000040 1.000 2

age{all}[77] 166.558299 59.972676 162.999941 183.236647 163.000036 1.000 2

age{all}[78] 435.932612 112.054936 431.999850 457.294034 432.000041 1.001 2

age{all}[79] 3.495330 6.121522 0.260633 8.360577 2.874952 1.000 2

age{all}[80] 158.577615 2.010016 157.999943 161.985875 158.000025 1.000 2

age{all}[81] 6.031538 7.465221 1.377405 11.308275 5.613361 1.001 2

age{all}[82] 1.391820 1.555610 0.006651 3.758219 1.043446 1.001 2

age{all}[83] 1.395071 1.597198 0.006535 3.779221 1.034734 1.000 2

age{all}[84] 356.716633 410.539451 319.999940 393.265525 354.031434 1.002 2

age{all}[85] 372.812638 1161.149853 318.899349 439.672507 367.039804 1.001 2

age{all}[86] 462.514685 1540.540083 394.405733 542.837413 456.974373 1.002 2

age{all}[87] 449.946007 585.378554 431.999851 499.501701 438.895671 1.001 2

age{all}[88] 371.140701 481.309591 332.094667 411.944423 370.185996 1.004 2

age{all}[89] 11.423237 21.235250 3.532939 20.452297 10.739783 1.005 2

age{all}[90] 163.443986 3.105738 162.999922 166.028194 163.000023 1.000 2

age{all}[91] 415.862917 274.688193 389.499294 448.130356 413.348028 1.000 2

age{all}[92] 7.993887 9.089428 3.071160 14.228019 7.555110 1.008 2

age{all}[93] 389.565571 378.837228 359.999916 425.079848 387.377050 1.000 2

age{all}[94] 395.709437 1407.996921 329.989085 468.341077 391.427930 1.000 2

age{all}[95] 150.816821 157.234563 124.999972 174.127942 149.824589 1.000 2

age{all}[96] 6.924888 7.712364 2.241001 12.501524 6.518741 1.002 2

age{all}[97] 453.537254 1334.104217 391.774480 527.350880 448.757436 1.001 2

age{all}[98] 4.431628 8.887327 0.390418 10.288143 3.690299 1.001 2

age{all}[99] 365.534401 137.819635 359.999897 391.536884 360.000042 1.000 2

age{all}[100] 415.893010 1443.852627 345.605780 489.194571 411.946503 1.001 2

age{all}[101] 1.652146 1.792590 0.036739 4.272104 1.293366 1.000 2

age{all}[102] 354.542860 429.926088 319.999919 392.018225 352.215062 1.000 2

age{all}[103] 361.318950 490.272450 322.215803 403.261842 359.075258 1.001 2

age{all}[104] 13.103041 25.646357 4.622084 23.481190 12.325891 1.000 2

age{all}[105] 159.042320 3.693280 157.999951 162.590650 158.000035 1.000 2

age{all}[106] 403.550187 806.451205 384.999866 463.632908 385.000081 1.000 2

age{all}[107] 438.933993 1029.705144 381.654766 500.545336 434.957955 1.000 2

age{all}[108] 474.806718 372.765354 442.956035 512.761949 471.477814 1.000 2

age{all}[109] 460.111383 824.711902 431.999871 515.322889 453.474309 1.000 2

age{all}[110] 4.136285 8.488528 0.360453 9.833819 3.415009 1.000 2

age{all}[111] 169.234763 93.802751 162.999942 189.256821 163.801121 1.001 2

age{all}[112] 68.746352 448.841961 34.376554 109.634495 65.788755 1.001 2

age{all}[113] 4.296821 8.112864 0.452276 9.992890 3.596548 1.000 2

age{all}[114] 447.575279 1088.511909 389.423894 514.392708 443.549935 1.005 2

age{all}[115] 387.384419 1344.256537 326.482929 459.108937 381.930813 1.001 2

age{all}[116] 63.048051 457.147835 26.674259 109.297999 60.419720 1.003 2

age{all}[117] 20.715159 45.199284 9.631183 33.887063 19.724097 1.000 2

age{all}[118] 11.824480 17.717910 4.705079 20.199871 11.035633 1.002 2

age{all}[119] 518.981307 943.021833 464.980633 579.461029 514.902304 1.004 2

age{all}[120] 375.660441 438.389815 334.973219 415.315326 373.789898 1.000 2

age{all}[121] 474.399671 1319.141854 411.982099 551.192570 469.918369 1.005 2

age{all}[122] 8.881867 21.617824 1.634251 18.322065 7.918888 1.001 2

age{all}[123] 383.572043 302.827957 359.999905 414.621262 381.688951 1.000 2

IlnBrlens{1}_length[1] 0.500937 0.320051 0.000019 1.502505 0.340735 1.000 2

IlnBrlens{1}_length[2] 0.010395 0.001118 0.000000 0.062768 0.000000 1.000 2

IlnBrlens{1}_length[3] 0.154832 0.015060 0.008853 0.391330 0.123043 1.000 2

IlnBrlens{1}_length[4] 0.132059 0.019823 0.000000 0.386506 0.091798 1.000 2

IlnBrlens{1}_length[5] 0.015611 0.001940 0.000000 0.089481 0.000000 1.001 2

IlnBrlens{1}_length[6] 0.134765 0.030159 0.000000 0.455437 0.079201 1.001 2

IlnBrlens{1}_length[7] 0.065478 0.004265 0.000000 0.188567 0.046241 1.000 2

IlnBrlens{1}_length[8] 0.001169 0.000030 0.000000 0.007553 0.000000 1.000 2

IlnBrlens{1}_length[9] 0.010972 0.000098 0.000000 0.029045 0.008267 1.000 2

IlnBrlens{1}_length[10] 0.050227 0.065317 0.000000 0.292756 0.000000 1.000 2

IlnBrlens{1}_length[11] 0.004211 0.000419 0.000000 0.023288 0.000000 1.000 2

IlnBrlens{1}_length[12] 0.023553 0.000413 0.000436 0.063077 0.017920 1.001 2

IlnBrlens{1}_length[13] 0.019423 0.000347 0.000221 0.054218 0.014034 1.002 2

IlnBrlens{1}_length[14] 0.026408 0.000551 0.000502 0.070542 0.020003 1.001 2

IlnBrlens{1}_length[15] 0.050266 0.001718 0.000938 0.129185 0.039093 1.002 2

IlnBrlens{1}_length[16] 0.013705 0.000276 0.000002 0.045230 0.008346 1.000 2

IlnBrlens{1}_length[17] 0.015293 0.000348 0.000011 0.049869 0.009308 1.000 2

IlnBrlens{1}_length[18] 0.046877 0.001510 0.001189 0.121091 0.036708 1.000 2

IlnBrlens{1}_length[19] 0.447258 0.227615 0.000000 1.278400 0.314609 1.000 2

IlnBrlens{1}_length[20] 0.231807 0.063644 0.000000 0.671081 0.160869 1.000 2

IlnBrlens{1}_length[21] 0.015423 0.000182 0.000130 0.041470 0.011663 1.000 2

IlnBrlens{1}_length[22] 0.026278 0.000440 0.000703 0.066816 0.020791 1.000 2

IlnBrlens{1}_length[23] 0.007985 0.000061 0.000041 0.022759 0.005689 1.000 2

IlnBrlens{1}_length[24] 0.135429 0.009775 0.005135 0.325266 0.112365 1.001 2

IlnBrlens{1}_length[25] 0.003524 0.000022 0.000001 0.012001 0.001978 1.000 2

IlnBrlens{1}_length[26] 0.004237 0.000030 0.000004 0.014182 0.002447 1.000 2

IlnBrlens{1}_length[27] 0.004068 0.000028 0.000002 0.013630 0.002346 1.000 2

IlnBrlens{1}_length[28] 0.021534 0.000541 0.000037 0.065226 0.014425 1.000 2

IlnBrlens{1}_length[29] 0.016085 0.000321 0.000033 0.049299 0.010565 1.000 2

IlnBrlens{1}_length[30] 0.019709 0.000337 0.000183 0.054314 0.014539 1.001 2

IlnBrlens{1}_length[31] 0.013987 0.000198 0.000062 0.040827 0.009719 1.000 2

IlnBrlens{1}_length[32] 0.002906 0.000024 0.000000 0.011135 0.001245 1.001 2

IlnBrlens{1}_length[33] 0.011256 0.000131 0.000075 0.032922 0.007775 1.001 2

IlnBrlens{1}_length[34] 0.014877 0.000257 0.000020 0.044904 0.009909 1.000 2

IlnBrlens{1}_length[35] 0.002914 0.000022 0.000000 0.011211 0.001272 1.000 2

IlnBrlens{1}_length[36] 0.006252 0.000059 0.000006 0.019971 0.003835 1.000 2

IlnBrlens{1}_length[37] 0.010023 0.000145 0.000012 0.031324 0.006304 1.000 2

IlnBrlens{1}_length[38] 0.005477 0.000041 0.000005 0.017265 0.003426 1.000 2

IlnBrlens{1}_length[39] 0.200352 0.027942 0.000000 0.515630 0.156744 1.000 2

IlnBrlens{1}_length[40] 0.000562 0.000012 0.000000 0.002488 0.000000 1.000 2

IlnBrlens{1}_length[41] 0.004531 0.000079 0.000000 0.020791 0.000000 1.000 2

IlnBrlens{1}_length[42] 0.119773 0.024840 0.000000 0.402336 0.075824 1.000 2

IlnBrlens{1}_length[43] 0.160947 0.023424 0.000000 0.438937 0.119096 1.000 2

IlnBrlens{1}_length[44] 0.120905 0.039913 0.000000 0.501785 0.028960 1.000 2

IlnBrlens{1}_length[45] 0.127508 0.016087 0.000000 0.362095 0.090744 1.000 2

IlnBrlens{1}_length[46] 4.107029 27.628795 0.170046 12.215980 2.573029 1.000 2

IlnBrlens{1}_length[47] 0.126984 0.008150 0.003305 0.297351 0.106216 1.000 2

IlnBrlens{1}_length[48] 0.054262 0.002251 0.000953 0.146149 0.041178 1.000 2

IlnBrlens{1}_length[49] 0.265063 0.172296 0.000001 1.010754 0.113705 1.000 2

IlnBrlens{1}_length[50] 0.088010 0.004949 0.002296 0.224997 0.069152 1.000 2

IlnBrlens{1}_length[51] 0.068034 0.003334 0.001631 0.178256 0.052376 1.000 2

IlnBrlens{1}_length[52] 0.667000 0.282739 0.030163 1.660986 0.529365 1.000 2

IlnBrlens{1}_length[53] 0.083524 0.004769 0.001081 0.215696 0.065246 1.000 2

IlnBrlens{1}_length[54] 0.394894 0.089633 0.013076 0.954324 0.319532 1.000 2

IlnBrlens{1}_length[55] 0.008578 0.000070 0.000048 0.024501 0.006082 1.001 2

IlnBrlens{1}_length[56] 0.189151 0.027931 0.001602 0.500228 0.141648 1.000 2

IlnBrlens{1}_length[57] 0.008912 0.000104 0.000045 0.027807 0.005699 1.000 2

IlnBrlens{1}_length[58] 0.022935 0.000478 0.000000 0.064813 0.016759 1.000 2

IlnBrlens{1}_length[59] 3.190556 30.112116 0.000170 11.533750 1.481186 1.000 2

IlnBrlens{1}_length[60] 0.160615 0.051481 0.000032 0.542978 0.089461 1.000 2

IlnBrlens{1}_length[61] 0.126019 0.017291 0.000002 0.375188 0.086216 1.000 2

IlnBrlens{1}_length[62] 0.060140 0.003126 0.000000 0.167747 0.044466 1.000 2

IlnBrlens{1}_length[63] 0.007519 0.000081 0.000000 0.024572 0.004567 1.000 2

IlnBrlens{1}_length[64] 0.047047 0.003434 0.000000 0.157177 0.027614 1.000 2

IlnBrlens{1}_length[65] 0.012749 0.000170 0.000001 0.037562 0.008857 1.001 2

IlnBrlens{1}_length[66] 0.020743 0.000431 0.000000 0.060089 0.014764 1.000 2

IlnBrlens{1}_length[67] 0.015147 0.000251 0.000002 0.044347 0.010425 1.001 2

IlnBrlens{1}_length[68] 0.015015 0.000233 0.000003 0.044130 0.010337 1.000 2

IlnBrlens{1}_length[69] 0.210393 0.060191 0.000012 0.670440 0.131673 1.000 2

IlnBrlens{1}_length[70] 0.097617 0.015118 0.000001 0.323122 0.058516 1.000 2

IlnBrlens{1}_length[71] 0.042922 0.002352 0.000003 0.134812 0.027514 1.000 2

IlnBrlens{1}_length[72] 0.009673 0.000113 0.000000 0.029870 0.006287 1.001 2

IlnBrlens{1}_length[73] 0.012137 0.000201 0.000017 0.038841 0.007554 1.000 2

IlnBrlens{1}_length[74] 0.235371 0.072252 0.000004 0.699315 0.159083 1.000 2

IlnBrlens{1}_length[75] 0.009122 0.000105 0.000000 0.028185 0.005892 1.001 2

IlnBrlens{1}_length[76] 0.322237 0.113980 0.000015 0.928051 0.227247 1.000 2

IlnBrlens{1}_length[77] 0.074429 0.010070 0.000004 0.252060 0.042391 1.000 2

IlnBrlens{1}_length[78] 0.130465 0.023897 0.000004 0.417701 0.080953 1.000 2

IlnBrlens{1}_length[79] 0.008927 0.000102 0.000000 0.027882 0.005715 1.001 2

IlnBrlens{1}_length[80] 0.010617 0.000144 0.000000 0.032897 0.006869 1.000 2

IlnBrlens{1}_length[81] 0.007330 0.000084 0.000000 0.024426 0.004267 1.000 2

IlnBrlens{1}_length[82] 0.003219 0.000022 0.000000 0.011703 0.001620 1.001 2

IlnBrlens{1}_length[83] 0.003309 0.000025 0.000000 0.012202 0.001613 1.000 2

IlnBrlens{1}_length[84] 0.101698 0.024887 0.000003 0.357566 0.052053 1.001 2

IlnBrlens{1}_length[85] 0.193259 0.059819 0.000001 0.632809 0.116643 1.000 2

IlnBrlens{1}_length[86] 0.228000 0.072392 0.000003 0.722872 0.145141 1.001 2

IlnBrlens{1}_length[87] 0.138583 0.032819 0.000008 0.471315 0.079757 1.000 2

IlnBrlens{1}_length[88] 0.064409 0.008450 0.000001 0.231979 0.033171 1.001 2

IlnBrlens{1}_length[89] 0.011611 0.000183 0.000001 0.036926 0.007225 1.000 2

IlnBrlens{1}_length[90] 0.032851 0.002462 0.000000 0.119447 0.016153 1.000 2

IlnBrlens{1}_length[91] 0.081301 0.011727 0.000001 0.274413 0.046873 1.000 2

IlnBrlens{1}_length[92] 0.005446 0.000051 0.000000 0.019025 0.003026 1.000 2

IlnBrlens{1}_length[93] 0.118773 0.057584 0.000002 0.493643 0.041216 1.000 2

IlnBrlens{1}_length[94] 0.198948 0.260650 0.000001 0.714510 0.076564 1.000 2

IlnBrlens{1}_length[95] 0.056063 0.006763 0.000003 0.202960 0.027533 1.000 2

IlnBrlens{1}_length[96] 0.003944 0.000025 0.000000 0.013352 0.002246 1.000 2

IlnBrlens{1}_length[97] 0.213070 0.065166 0.000002 0.677674 0.133935 1.000 2

IlnBrlens{1}_length[98] 0.004782 0.000045 0.000001 0.016562 0.002558 1.001 2

IlnBrlens{1}_length[99] 0.227584 0.069903 0.000022 0.714138 0.148011 1.000 2

IlnBrlens{1}_length[100] 0.245149 0.507028 0.000014 0.893803 0.085797 1.000 2

IlnBrlens{1}_length[101] 0.002508 0.000015 0.000000 0.009630 0.001145 1.000 2

IlnBrlens{1}_length[102] 0.089384 0.016916 0.000004 0.303402 0.048393 1.000 2

IlnBrlens{1}_length[103] 0.045362 0.003846 0.000000 0.156058 0.024558 1.001 2

IlnBrlens{1}_length[104] 0.008865 0.000120 0.000000 0.030117 0.005122 1.000 2

IlnBrlens{1}_length[105] 0.011325 0.000204 0.000000 0.037384 0.006697 1.000 2

IlnBrlens{1}_length[106] 0.159196 0.046585 0.000003 0.535267 0.091594 1.000 2

IlnBrlens{1}_length[107] 0.147334 0.041047 0.000001 0.520428 0.079158 1.000 2

IlnBrlens{1}_length[108] 0.075611 0.011695 0.000003 0.267485 0.039874 1.000 2

IlnBrlens{1}_length[109] 0.133847 0.029392 0.000003 0.444486 0.079118 1.000 2

IlnBrlens{1}_length[110] 0.005981 0.000054 0.000001 0.020006 0.003466 1.001 2

IlnBrlens{1}_length[111] 0.095211 0.021974 0.000009 0.339759 0.048728 1.000 2

IlnBrlens{1}_length[112] 0.034694 0.002025 0.000004 0.117209 0.019697 1.002 2

IlnBrlens{1}_length[113] 0.005887 0.000060 0.000000 0.020707 0.003250 1.000 2

IlnBrlens{1}_length[114] 0.142344 0.037758 0.000026 0.481689 0.080103 1.000 2

IlnBrlens{1}_length[115] 0.743489 5.978453 0.000011 2.923191 0.223569 1.002 2

IlnBrlens{1}_length[116] 0.042539 0.003025 0.000001 0.147196 0.023638 1.000 2

IlnBrlens{1}_length[117] 0.014471 0.000270 0.000001 0.046182 0.009062 1.001 2

IlnBrlens{1}_length[118] 0.008770 0.000090 0.000009 0.026894 0.005624 1.000 2

IlnBrlens{1}_length[119] 0.299345 0.104474 0.000015 0.921026 0.194860 1.000 2

IlnBrlens{1}_length[120] 0.048569 0.004247 0.000004 0.166108 0.026877 1.000 2

IlnBrlens{1}_length[121] 0.121948 0.032790 0.000002 0.449700 0.058805 1.000 2

IlnBrlens{1}_length[122] 0.007352 0.000089 0.000000 0.025439 0.004179 1.003 2

IlnBrlens{1}_length[123] 0.069590 0.018080 0.000005 0.306534 0.024038 1.000 2

IlnBrlens{1}_rate[1] 2.430049 8.448816 0.014700 7.338215 1.567105 1.000 2

IlnBrlens{1}_rate[2] 0.877814 0.112550 0.104361 1.000682 1.000000 1.000 2

IlnBrlens{1}_rate[3] 0.696927 0.358441 0.046209 1.724795 0.549355 1.000 2

IlnBrlens{1}_rate[4] 1.059349 1.379208 0.011369 2.996621 0.771178 1.000 2

IlnBrlens{1}_rate[5] 0.860524 0.126879 0.044948 1.000597 1.000000 1.000 2

IlnBrlens{1}_rate[6] 0.965467 1.058132 0.005123 2.595226 0.778028 1.000 2

IlnBrlens{1}_rate[7] 0.495206 0.211625 0.008986 1.343852 0.362896 1.000 2

IlnBrlens{1}_rate[8] 0.974213 0.035422 0.370334 1.000242 1.000000 1.000 2

IlnBrlens{1}_rate[9] 0.864511 0.512030 0.024647 2.245427 0.679464 1.000 2

IlnBrlens{1}_rate[10] 1.088708 0.526753 0.102995 1.689577 1.000000 1.000 2

IlnBrlens{1}_rate[11] 0.994611 0.087928 0.097351 1.000000 1.000000 1.000 2

IlnBrlens{1}_rate[12] 0.670064 0.330484 0.016815 1.768395 0.516276 1.000 2

IlnBrlens{1}_rate[13] 0.472719 0.182142 0.006074 1.278501 0.355106 1.000 2

IlnBrlens{1}_rate[14] 0.576044 0.266922 0.009227 1.512607 0.437009 1.000 2

IlnBrlens{1}_rate[15] 0.463701 0.146868 0.011246 1.203799 0.362028 1.002 2

IlnBrlens{1}_rate[16] 0.829806 0.865925 0.002888 2.435184 0.570580 1.000 2

IlnBrlens{1}_rate[17] 0.941479 1.264900 0.017664 2.727172 0.631723 1.000 2

IlnBrlens{1}_rate[18] 0.433831 0.132014 0.010044 1.128560 0.336764 1.000 2

IlnBrlens{1}_rate[19] 1.575000 2.682199 0.027426 4.318033 1.133803 1.000 2

IlnBrlens{1}_rate[20] 0.840866 0.824186 0.009958 2.272250 0.610968 1.000 2

IlnBrlens{1}_rate[21] 0.659116 0.320065 0.024643 1.728687 0.505859 1.000 2

IlnBrlens{1}_rate[22] 1.082638 0.997206 0.019550 2.862214 0.811520 1.000 2

IlnBrlens{1}_rate[23] 1.091057 1.189649 0.018188 3.010448 0.791314 1.000 2

IlnBrlens{1}_rate[24] 0.560508 0.166557 0.014732 1.334530 0.467257 1.001 2

IlnBrlens{1}_rate[25] 0.711488 0.583664 0.009437 2.070064 0.489819 1.000 2

IlnBrlens{1}_rate[26] 0.697476 0.550379 0.004790 1.985042 0.487025 1.000 2

IlnBrlens{1}_rate[27] 0.683164 0.549765 0.004134 1.963765 0.476237 1.000 2

IlnBrlens{1}_rate[28] 1.359030 2.415623 0.007149 4.029374 0.920057 1.000 2

IlnBrlens{1}_rate[29] 1.021832 1.449750 0.008503 3.107861 0.669042 1.000 2

IlnBrlens{1}_rate[30] 0.449283 0.206807 0.007262 1.252626 0.320714 1.000 2

IlnBrlens{1}_rate[31] 0.504565 0.283930 0.007277 1.418728 0.356454 1.001 2

IlnBrlens{1}_rate[32] 0.829266 0.977212 0.001171 2.476572 0.546188 1.001 2

IlnBrlens{1}_rate[33] 0.667057 0.521486 0.004887 1.932144 0.463475 1.000 2

IlnBrlens{1}_rate[34] 1.134498 1.380284 0.013124 3.174391 0.809080 1.000 2

IlnBrlens{1}_rate[35] 0.805620 0.897338 0.007081 2.342021 0.543847 1.000 2

IlnBrlens{1}_rate[36] 0.780743 0.817081 0.004839 2.350280 0.522796 1.000 2

IlnBrlens{1}_rate[37] 1.224869 1.783438 0.007135 3.562717 0.838471 1.000 2

IlnBrlens{1}_rate[38] 0.702979 0.579344 0.008713 2.031376 0.488891 1.000 2

IlnBrlens{1}_rate[39] 1.236310 1.130698 0.044798 3.136425 0.964577 1.000 2

IlnBrlens{1}_rate[40] 0.955399 0.042414 0.322247 1.000061 1.000000 1.000 2

IlnBrlens{1}_rate[41] 0.794124 0.196901 0.020420 1.182868 1.000000 1.000 2

IlnBrlens{1}_rate[42] 1.574361 2.394525 0.074081 4.252449 1.000000 1.000 2

IlnBrlens{1}_rate[43] 1.043565 1.740085 0.020501 2.719252 0.752101 1.000 2

IlnBrlens{1}_rate[44] 1.423786 1.785174 0.063836 3.559619 1.000000 1.000 2

IlnBrlens{1}_rate[45] 0.565172 0.330871 0.005161 1.522600 0.415862 1.000 2

IlnBrlens{1}_rate[46] 5.537906 43.610507 0.302038 16.216923 3.590016 1.000 2

IlnBrlens{1}_rate[47] 0.707057 0.276844 0.014769 1.690360 0.577125 1.000 2

IlnBrlens{1}_rate[48] 0.414559 0.119972 0.015184 1.092934 0.323589 1.000 2

IlnBrlens{1}_rate[49] 1.988662 9.601465 0.007150 6.697109 1.038321 1.000 2

IlnBrlens{1}_rate[50] 0.384288 0.094292 0.010958 0.970133 0.300824 1.000 2

IlnBrlens{1}_rate[51] 0.958696 0.632488 0.043237 2.427949 0.761452 1.000 2

IlnBrlens{1}_rate[52] 1.321629 1.053609 0.091330 3.266960 1.065889 1.000 2

IlnBrlens{1}_rate[53] 0.761811 0.427738 0.019899 1.961202 0.591705 1.000 2

IlnBrlens{1}_rate[54] 1.541336 1.752101 0.059489 3.787235 1.214249 1.000 2

IlnBrlens{1}_rate[55] 0.509699 0.231944 0.007234 1.360286 0.372881 1.000 2

IlnBrlens{1}_rate[56] 1.695217 2.311657 0.032747 4.462697 1.282666 1.000 2

IlnBrlens{1}_rate[57] 0.539379 0.280161 0.007805 1.491104 0.384762 1.000 2

IlnBrlens{1}_rate[58] 1.281924 1.730459 0.021142 3.445058 0.928961 1.000 2

IlnBrlens{1}_rate[59] 7.630884 140.095026 0.033414 25.433095 4.033889 1.000 2

IlnBrlens{1}_rate[60] 0.824138 0.921349 0.007486 2.385998 0.557824 1.000 2

IlnBrlens{1}_rate[61] 0.711888 0.501699 0.006759 1.986621 0.516878 1.000 2

IlnBrlens{1}_rate[62] 0.873140 0.654327 0.013410 2.320498 0.661036 1.000 2

IlnBrlens{1}_rate[63] 0.774140 0.695968 0.007951 2.248345 0.542674 1.000 2

IlnBrlens{1}_rate[64] 0.670848 0.478516 0.010806 1.899360 0.479431 1.000 2

IlnBrlens{1}_rate[65] 0.681426 0.468669 0.012851 1.897492 0.489739 1.001 2

IlnBrlens{1}_rate[66] 0.856830 0.789670 0.010800 2.374959 0.614979 1.000 2

IlnBrlens{1}_rate[67] 0.475711 0.223913 0.003474 1.324010 0.341760 1.000 2

IlnBrlens{1}_rate[68] 0.502604 0.227722 0.006760 1.370890 0.368954 1.000 2

IlnBrlens{1}_rate[69] 1.168153 1.803947 0.009522 3.502039 0.789357 1.000 2

IlnBrlens{1}_rate[70] 0.795447 0.730361 0.002376 2.293971 0.550664 1.000 2

IlnBrlens{1}_rate[71] 0.727938 0.566526 0.007730 2.065968 0.518403 1.000 2

IlnBrlens{1}_rate[72] 0.609795 0.409822 0.005515 1.727268 0.430640 1.000 2

IlnBrlens{1}_rate[73] 0.754754 0.632297 0.008025 2.184796 0.532036 1.000 2

IlnBrlens{1}_rate[74] 1.289316 1.900716 0.024048 3.641030 0.902288 1.000 2

IlnBrlens{1}_rate[75] 0.553993 0.352270 0.005985 1.587544 0.391785 1.000 2

IlnBrlens{1}_rate[76] 2.646398 8.607412 0.018250 7.247921 1.870348 1.000 2

IlnBrlens{1}_rate[77] 0.810618 0.857507 0.013997 2.399119 0.541774 1.000 2

IlnBrlens{1}_rate[78] 0.952074 1.021070 0.006693 2.704750 0.667559 1.000 2

IlnBrlens{1}_rate[79] 0.979304 1.261429 0.018102 2.801848 0.673289 1.000 2

IlnBrlens{1}_rate[80] 0.672463 0.439013 0.006428 1.913168 0.478873 1.000 2

IlnBrlens{1}_rate[81] 0.836688 0.807209 0.003792 2.433254 0.573665 1.000 2

IlnBrlens{1}_rate[82] 0.746347 0.697769 0.003528 2.122190 0.515496 1.001 2

IlnBrlens{1}_rate[83] 0.764868 0.725365 0.009558 2.187861 0.523346 1.000 2

IlnBrlens{1}_rate[84] 1.215173 2.528757 0.011583 3.766137 0.760371 1.001 2

IlnBrlens{1}_rate[85] 0.861187 0.837657 0.004568 2.408076 0.599394 1.000 2

IlnBrlens{1}_rate[86] 1.280756 1.919971 0.006472 3.575287 0.890867 1.000 2

IlnBrlens{1}_rate[87] 1.002418 1.429206 0.010560 2.956206 0.668077 1.000 2

IlnBrlens{1}_rate[88] 1.110049 2.201309 0.004127 3.662021 0.641727 1.001 2

IlnBrlens{1}_rate[89] 0.640633 0.398888 0.009847 1.807549 0.452834 1.000 2

IlnBrlens{1}_rate[90] 0.882514 1.019975 0.008256 2.644441 0.584710 1.000 2

IlnBrlens{1}_rate[91] 0.817148 0.839121 0.009561 2.319834 0.576294 1.000 2

IlnBrlens{1}_rate[92] 0.656028 0.506350 0.005581 1.893315 0.457138 1.000 2

IlnBrlens{1}_rate[93] 1.110780 1.784857 0.004795 3.375283 0.707976 1.000 2

IlnBrlens{1}_rate[94] 1.059035 2.426903 0.006038 3.291448 0.631747 1.000 2

IlnBrlens{1}_rate[95] 1.096504 1.688313 0.003453 3.309707 0.708663 1.000 2

IlnBrlens{1}_rate[96] 0.704870 0.591787 0.003028 1.974453 0.485949 1.000 2

IlnBrlens{1}_rate[97] 1.285897 2.052057 0.023322 3.682544 0.874232 1.001 2

IlnBrlens{1}_rate[98] 0.708185 0.685797 0.009453 2.066859 0.472871 1.000 2

IlnBrlens{1}_rate[99] 2.477194 7.778760 0.017892 7.239002 1.672199 1.001 2

IlnBrlens{1}_rate[100] 1.248532 5.216887 0.009717 3.836819 0.720128 1.000 2

IlnBrlens{1}_rate[101] 0.779199 0.837661 0.008863 2.281778 0.530207 1.000 2

IlnBrlens{1}_rate[102] 0.994652 1.398853 0.010050 2.888099 0.659581 1.000 2

IlnBrlens{1}_rate[103] 0.772942 0.786197 0.010370 2.271945 0.516208 1.000 2

IlnBrlens{1}_rate[104] 0.785427 0.782983 0.010739 2.290858 0.539693 1.000 2

IlnBrlens{1}_rate[105] 0.727207 0.625848 0.004180 2.157571 0.489198 1.000 2

IlnBrlens{1}_rate[106] 0.994052 1.528134 0.006928 2.924750 0.653079 1.001 2

IlnBrlens{1}_rate[107] 1.265489 2.160051 0.008170 3.678079 0.850595 1.000 2

IlnBrlens{1}_rate[108] 0.954651 1.311363 0.008399 2.778315 0.634814 1.000 2

IlnBrlens{1}_rate[109] 0.878996 0.963664 0.016391 2.482348 0.610192 1.001 2

IlnBrlens{1}_rate[110] 0.666915 0.603852 0.008475 1.917693 0.452885 1.000 2

IlnBrlens{1}_rate[111] 1.703872 4.587524 0.004560 5.245065 1.008228 1.001 2

IlnBrlens{1}_rate[112] 0.695645 0.556026 0.015934 1.985769 0.480343 1.001 2

IlnBrlens{1}_rate[113] 0.980678 1.470039 0.012447 2.869086 0.647526 1.000 2

IlnBrlens{1}_rate[114] 1.286309 2.283136 0.018308 3.956757 0.841542 1.000 2

IlnBrlens{1}_rate[115] 3.225790 44.731104 0.007629 11.895512 1.424196 1.001 2

IlnBrlens{1}_rate[116] 1.011173 1.215514 0.024844 2.884803 0.688992 1.000 2

IlnBrlens{1}_rate[117] 0.811120 0.753187 0.009506 2.261708 0.573473 1.002 2

IlnBrlens{1}_rate[118] 0.535121 0.262364 0.010821 1.475373 0.392819 1.000 2

IlnBrlens{1}_rate[119] 1.862659 3.642566 0.027441 5.526638 1.269801 1.001 2

IlnBrlens{1}_rate[120] 0.748585 0.653687 0.007255 2.171247 0.510699 1.000 2

IlnBrlens{1}_rate[121] 1.038422 1.409649 0.012932 3.154052 0.690105 1.000 2

IlnBrlens{1}_rate[122] 0.669722 0.502759 0.011778 1.910918 0.482323 1.000 2

IlnBrlens{1}_rate[123] 1.285284 3.103799 0.014642 4.312248 0.728025 1.002 2

IlnBrlens{2}_length[1] 0.226535 0.070739 0.000023 0.636245 0.157888 1.000 2

IlnBrlens{2}_length[2] 0.019894 0.004050 0.000000 0.119709 0.000000 1.000 2

IlnBrlens{2}_length[3] 0.351301 0.126928 0.015441 0.908239 0.259565 1.000 2

IlnBrlens{2}_length[4] 0.154175 0.033072 0.000000 0.427732 0.111262 1.000 2

IlnBrlens{2}_length[5] 0.028410 0.006058 0.000000 0.163182 0.000000 1.001 2

IlnBrlens{2}_length[6] 0.182445 0.051786 0.000000 0.572919 0.119633 1.000 2

IlnBrlens{2}_length[7] 0.126029 0.012680 0.000000 0.329946 0.097103 1.000 2

IlnBrlens{2}_length[8] 0.001606 0.000057 0.000000 0.010121 0.000000 1.001 2

IlnBrlens{2}_length[9] 0.017206 0.000287 0.000000 0.045298 0.012622 1.000 2

IlnBrlens{2}_length[10] 0.030532 0.015337 0.000000 0.203347 0.000000 1.000 2

IlnBrlens{2}_length[11] 0.004325 0.000418 0.000000 0.026390 0.000000 1.000 2

IlnBrlens{2}_length[12] 0.049565 0.002039 0.000818 0.129202 0.037810 1.000 2

IlnBrlens{2}_length[13] 0.043689 0.001489 0.000726 0.108343 0.034248 1.001 2

IlnBrlens{2}_length[14] 0.063024 0.003560 0.001612 0.165895 0.047464 1.000 2

IlnBrlens{2}_length[15] 0.106371 0.008164 0.003580 0.261203 0.085148 1.000 2

IlnBrlens{2}_length[16] 0.016759 0.000450 0.000015 0.053534 0.010231 1.000 2

IlnBrlens{2}_length[17] 0.016927 0.000461 0.000011 0.054093 0.010307 1.000 2

IlnBrlens{2}_length[18] 0.094595 0.005814 0.003074 0.229891 0.076970 1.000 2

IlnBrlens{2}_length[19] 0.358234 0.195955 0.000000 1.011518 0.250429 1.000 2

IlnBrlens{2}_length[20] 0.264776 0.073173 0.000000 0.714539 0.196546 1.000 2

IlnBrlens{2}_length[21] 0.020980 0.000329 0.000349 0.052674 0.016769 1.001 2

IlnBrlens{2}_length[22] 0.024281 0.000534 0.000238 0.065358 0.018217 1.001 2

IlnBrlens{2}_length[23] 0.008029 0.000086 0.000014 0.023707 0.005360 1.001 2

IlnBrlens{2}_length[24] 0.148821 0.012179 0.002625 0.347801 0.124266 1.002 2

IlnBrlens{2}_length[25] 0.005410 0.000052 0.000005 0.017817 0.003168 1.000 2

IlnBrlens{2}_length[26] 0.006451 0.000075 0.000003 0.020692 0.003875 1.000 2

IlnBrlens{2}_length[27] 0.006411 0.000070 0.000005 0.020787 0.003821 1.000 2

IlnBrlens{2}_length[28] 0.016602 0.000348 0.000063 0.049907 0.011057 1.000 2

IlnBrlens{2}_length[29] 0.016821 0.000374 0.000081 0.050878 0.011024 1.000 2

IlnBrlens{2}_length[30] 0.039114 0.001139 0.000596 0.101284 0.030462 1.000 2

IlnBrlens{2}_length[31] 0.026881 0.000657 0.000181 0.073644 0.019832 1.000 2

IlnBrlens{2}_length[32] 0.003936 0.000044 0.000000 0.014507 0.001797 1.000 2

IlnBrlens{2}_length[33] 0.017976 0.000375 0.000058 0.052322 0.012283 1.000 2

IlnBrlens{2}_length[34] 0.013526 0.000242 0.000038 0.041301 0.008822 1.000 2

IlnBrlens{2}_length[35] 0.004119 0.000051 0.000000 0.015451 0.001816 1.000 2

IlnBrlens{2}_length[36] 0.008929 0.000148 0.000026 0.027989 0.005413 1.001 2

IlnBrlens{2}_length[37] 0.008973 0.000170 0.000006 0.028183 0.005385 1.001 2

IlnBrlens{2}_length[38] 0.008221 0.000091 0.000019 0.024449 0.005467 1.000 2

IlnBrlens{2}_length[39] 0.132821 0.013170 0.000000 0.346676 0.103643 1.000 2

IlnBrlens{2}_length[40] 0.000871 0.000022 0.000000 0.004590 0.000000 1.000 2

IlnBrlens{2}_length[41] 0.006694 0.000131 0.000000 0.027284 0.000000 1.000 2

IlnBrlens{2}_length[42] 0.067899 0.006903 0.000000 0.218153 0.046086 1.000 2

IlnBrlens{2}_length[43] 0.120953 0.011014 0.000000 0.316284 0.094358 1.000 2

IlnBrlens{2}_length[44] 0.052479 0.007060 0.000000 0.217393 0.014013 1.001 2

IlnBrlens{2}_length[45] 0.329010 0.099370 0.000000 0.824955 0.250918 1.000 2

IlnBrlens{2}_length[46] 0.657662 0.244082 0.039135 1.518277 0.553112 1.000 2

IlnBrlens{2}_length[47] 0.118321 0.007862 0.001894 0.281230 0.099202 1.001 2

IlnBrlens{2}_length[48] 0.137364 0.017943 0.001746 0.360140 0.105008 1.000 2

IlnBrlens{2}_length[49] 0.134534 0.030803 0.000002 0.431044 0.082377 1.000 2

IlnBrlens{2}_length[50] 0.257778 0.042719 0.009920 0.613003 0.212117 1.000 2

IlnBrlens{2}_length[51] 0.101862 0.014746 0.001312 0.272411 0.072438 1.000 2

IlnBrlens{2}_length[52] 0.442723 0.125598 0.017388 1.032473 0.371229 1.000 2

IlnBrlens{2}_length[53] 0.080973 0.003964 0.001317 0.198988 0.066631 1.001 2

IlnBrlens{2}_length[54] 0.195522 0.025995 0.001833 0.486348 0.156398 1.001 2

IlnBrlens{2}_length[55] 0.016035 0.000236 0.000098 0.042568 0.012149 1.001 2

IlnBrlens{2}_length[56] 0.131017 0.017895 0.001360 0.358013 0.094894 1.000 2

IlnBrlens{2}_length[57] 0.016277 0.000333 0.000092 0.048336 0.010991 1.001 2

IlnBrlens{2}_length[58] 0.018334 0.000407 0.000000 0.054406 0.012382 1.000 2

IlnBrlens{2}_length[59] 0.493849 0.257869 0.004951 1.310876 0.365113 1.001 2

IlnBrlens{2}_length[60] 0.168270 0.030167 0.000647 0.470972 0.120684 1.000 2

IlnBrlens{2}_length[61] 0.313692 0.114513 0.000001 0.876329 0.222772 1.000 2

IlnBrlens{2}_length[62] 0.104487 0.017002 0.000000 0.317555 0.067822 1.000 2

IlnBrlens{2}_length[63] 0.010551 0.000190 0.000000 0.033770 0.006314 1.000 2

IlnBrlens{2}_length[64] 0.083776 0.012089 0.000001 0.265762 0.051020 1.000 2

IlnBrlens{2}_length[65] 0.019338 0.000442 0.000004 0.057708 0.013068 1.000 2

IlnBrlens{2}_length[66] 0.024041 0.000666 0.000000 0.071671 0.016341 1.000 2

IlnBrlens{2}_length[67] 0.028901 0.000718 0.000002 0.077972 0.021915 1.001 2

IlnBrlens{2}_length[68] 0.027059 0.000677 0.000002 0.075108 0.019949 1.000 2

IlnBrlens{2}_length[69] 0.209671 0.071515 0.000006 0.595450 0.141993 1.000 2

IlnBrlens{2}_length[70] 0.201200 0.071261 0.000001 0.618485 0.129074 1.000 2

IlnBrlens{2}_length[71] 0.049337 0.002505 0.000005 0.143122 0.034524 1.001 2

IlnBrlens{2}_length[72] 0.016599 0.000356 0.000000 0.051185 0.010733 1.001 2

IlnBrlens{2}_length[73] 0.017718 0.000568 0.000005 0.053560 0.011258 1.000 2

IlnBrlens{2}_length[74] 0.216842 0.068541 0.000009 0.633049 0.146034 1.000 2

IlnBrlens{2}_length[75] 0.017597 0.000416 0.000000 0.054035 0.011397 1.001 2

IlnBrlens{2}_length[76] 0.117599 0.016870 0.000009 0.329773 0.083811 1.001 2

IlnBrlens{2}_length[77] 0.087346 0.010202 0.000003 0.264498 0.057697 1.000 2

IlnBrlens{2}_length[78] 0.217433 0.089198 0.000006 0.663884 0.137830 1.000 2

IlnBrlens{2}_length[79] 0.010711 0.000207 0.000001 0.035258 0.006249 1.000 2

IlnBrlens{2}_length[80] 0.014544 0.000198 0.000000 0.038594 0.011186 1.000 2

IlnBrlens{2}_length[81] 0.008837 0.000101 0.000000 0.027263 0.005728 1.000 2

IlnBrlens{2}_length[82] 0.004760 0.000051 0.000000 0.016700 0.002449 1.000 2

IlnBrlens{2}_length[83] 0.004781 0.000052 0.000000 0.017005 0.002432 1.000 2

IlnBrlens{2}_length[84] 0.072414 0.006117 0.000001 0.213789 0.049466 1.001 2

IlnBrlens{2}_length[85] 0.262999 0.112212 0.000004 0.781797 0.175047 1.000 2

IlnBrlens{2}_length[86] 0.183595 0.042533 0.000017 0.537772 0.124169 1.001 2

IlnBrlens{2}_length[87] 0.212606 0.077596 0.000002 0.684746 0.131226 1.001 2

IlnBrlens{2}_length[88] 0.060665 0.004822 0.000001 0.186286 0.040185 1.000 2

IlnBrlens{2}_length[89] 0.022281 0.000709 0.000007 0.065223 0.015132 1.000 2

IlnBrlens{2}_length[90] 0.044252 0.003268 0.000003 0.144004 0.026947 1.000 2

IlnBrlens{2}_length[91] 0.136688 0.043290 0.000001 0.403270 0.087189 1.000 2

IlnBrlens{2}_length[92] 0.009485 0.000162 0.000000 0.032900 0.005236 1.001 2

IlnBrlens{2}_length[93] 0.092668 0.018612 0.000005 0.324412 0.048926 1.000 2

IlnBrlens{2}_length[94] 0.161091 0.043586 0.000002 0.494762 0.101788 1.000 2

IlnBrlens{2}_length[95] 0.049164 0.002838 0.000002 0.146345 0.033484 1.000 2

IlnBrlens{2}_length[96] 0.006216 0.000061 0.000000 0.020639 0.003648 1.000 2

IlnBrlens{2}_length[97] 0.182976 0.050998 0.000013 0.551769 0.118320 1.001 2

IlnBrlens{2}_length[98] 0.007682 0.000130 0.000001 0.026989 0.004020 1.000 2

IlnBrlens{2}_length[99] 0.109727 0.014395 0.000022 0.318512 0.076133 1.000 2

IlnBrlens{2}_length[100] 0.166436 0.048142 0.000014 0.515076 0.105191 1.000 2

IlnBrlens{2}_length[101] 0.003607 0.000034 0.000000 0.013018 0.001695 1.000 2

IlnBrlens{2}_length[102] 0.076391 0.007139 0.000003 0.232946 0.050814 1.001 2

IlnBrlens{2}_length[103] 0.057104 0.005265 0.000001 0.192066 0.033635 1.000 2

IlnBrlens{2}_length[104] 0.012225 0.000272 0.000001 0.041814 0.006905 1.002 2

IlnBrlens{2}_length[105] 0.014098 0.000192 0.000001 0.038058 0.010654 1.000 2

IlnBrlens{2}_length[106] 0.262418 0.131439 0.000003 0.881446 0.149697 1.000 2

IlnBrlens{2}_length[107] 0.127669 0.027414 0.000002 0.416538 0.076382 1.000 2

IlnBrlens{2}_length[108] 0.078365 0.017466 0.000008 0.240972 0.046694 1.000 2

IlnBrlens{2}_length[109] 0.259664 0.165193 0.000020 0.899389 0.137818 1.000 2

IlnBrlens{2}_length[110] 0.010041 0.000163 0.000004 0.033679 0.005749 1.000 2

IlnBrlens{2}_length[111] 0.055845 0.005634 0.000007 0.193224 0.031368 1.000 2

IlnBrlens{2}_length[112] 0.042932 0.002356 0.000004 0.132310 0.027913 1.002 2

IlnBrlens{2}_length[113] 0.006893 0.000103 0.000000 0.024679 0.003671 1.000 2

IlnBrlens{2}_length[114] 0.120759 0.023386 0.000020 0.388517 0.073993 1.001 2

IlnBrlens{2}_length[115] 0.174144 0.045487 0.000034 0.520560 0.114219 1.000 2

IlnBrlens{2}_length[116] 0.034608 0.001344 0.000002 0.107599 0.023134 1.003 2

IlnBrlens{2}_length[117] 0.017913 0.000436 0.000007 0.055620 0.011402 1.000 2

IlnBrlens{2}_length[118] 0.016411 0.000362 0.000003 0.048530 0.010936 1.000 2

IlnBrlens{2}_length[119] 0.165670 0.030800 0.000077 0.447692 0.120558 1.001 2

IlnBrlens{2}_length[120] 0.064384 0.006338 0.000004 0.202078 0.039821 1.000 2

IlnBrlens{2}_length[121] 0.114017 0.024610 0.000001 0.373402 0.066640 1.000 2

IlnBrlens{2}_length[122] 0.011958 0.000293 0.000000 0.039147 0.006861 1.005 2

IlnBrlens{2}_length[123] 0.046703 0.003979 0.000006 0.158092 0.025866 1.000 2

IlnBrlens{2}_rate[1] 0.980756 0.799265 0.017830 2.332908 0.838133 1.000 2

IlnBrlens{2}_rate[2] 0.990908 0.091895 0.254641 1.317673 1.000000 1.000 2

IlnBrlens{2}_rate[3] 1.506081 1.944694 0.100717 3.771675 1.133124 1.000 2

IlnBrlens{2}_rate[4] 1.048227 0.765645 0.044000 2.399907 0.910977 1.000 2

IlnBrlens{2}_rate[5] 0.980979 0.126488 0.180392 1.372314 1.000000 1.000 2

IlnBrlens{2}_rate[6] 1.130180 0.787375 0.059562 2.544029 1.000000 1.000 2

IlnBrlens{2}_rate[7] 0.906444 0.463437 0.037366 2.027263 0.800810 1.000 2

IlnBrlens{2}_rate[8] 0.985537 0.019881 0.708827 1.106988 1.000000 1.000 2

IlnBrlens{2}_rate[9] 1.305809 1.291699 0.050584 3.187171 1.028628 1.000 2

IlnBrlens{2}_rate[10] 0.996700 0.069119 0.437543 1.238162 1.000000 1.000 2

IlnBrlens{2}_rate[11] 0.981267 0.033888 0.530351 1.093189 1.000000 1.000 2

IlnBrlens{2}_rate[12] 1.364321 1.465523 0.061826 3.442504 1.051314 1.001 2

IlnBrlens{2}_rate[13] 1.037998 0.727903 0.031418 2.466303 0.884123 1.000 2

IlnBrlens{2}_rate[14] 1.305773 1.412170 0.070927 3.268597 1.015687 1.000 2

IlnBrlens{2}_rate[15] 0.925326 0.473151 0.027534 2.054734 0.819755 1.000 2

IlnBrlens{2}_rate[16] 0.860868 0.437315 0.025669 1.959567 0.767471 1.000 2

IlnBrlens{2}_rate[17] 0.862195 0.406551 0.021028 1.950822 0.770415 1.000 2

IlnBrlens{2}_rate[18] 0.830238 0.357674 0.027875 1.864937 0.739896 1.000 2

IlnBrlens{2}_rate[19] 1.153474 1.446046 0.024789 2.831025 0.923801 1.000 2

IlnBrlens{2}_rate[20] 0.892404 0.501060 0.019721 1.990443 0.798500 1.000 2

IlnBrlens{2}_rate[21] 0.861733 0.420352 0.024356 1.917687 0.759775 1.000 2

IlnBrlens{2}_rate[22] 0.863018 0.437974 0.015822 1.946383 0.770108 1.000 2

IlnBrlens{2}_rate[23] 0.932024 0.632976 0.016473 2.142276 0.812001 1.000 2

IlnBrlens{2}_rate[24] 0.599741 0.159754 0.022699 1.284240 0.528509 1.002 2

IlnBrlens{2}_rate[25] 0.966973 0.658654 0.018964 2.271682 0.821271 1.000 2

IlnBrlens{2}_rate[26] 0.942226 0.672283 0.023416 2.150823 0.811118 1.000 2

IlnBrlens{2}_rate[27] 0.955740 0.685078 0.013899 2.241614 0.817251 1.000 2

IlnBrlens{2}_rate[28] 0.891765 0.493530 0.023157 2.061509 0.785323 1.000 2

IlnBrlens{2}_rate[29] 0.890994 0.479373 0.022980 2.050980 0.784520 1.000 2

IlnBrlens{2}_rate[30] 0.800795 0.318310 0.025478 1.768961 0.720440 1.001 2

IlnBrlens{2}_rate[31] 0.838366 0.390574 0.020494 1.862086 0.746173 1.000 2

IlnBrlens{2}_rate[32] 0.973328 0.716475 0.026560 2.290778 0.823729 1.000 2

IlnBrlens{2}_rate[33] 0.900910 0.507199 0.027723 2.053561 0.789647 1.000 2

IlnBrlens{2}_rate[34] 0.909891 0.563528 0.010098 2.113174 0.783029 1.000 2

IlnBrlens{2}_rate[35] 0.961630 0.713775 0.016932 2.266886 0.817462 1.000 2

IlnBrlens{2}_rate[36] 0.930948 0.563630 0.025010 2.144245 0.809802 1.000 2

IlnBrlens{2}_rate[37] 0.937468 0.670905 0.024442 2.168460 0.813732 1.000 2

IlnBrlens{2}_rate[38] 0.953311 0.662238 0.030570 2.223215 0.821094 1.000 2

IlnBrlens{2}_rate[39] 0.752247 0.243742 0.021740 1.605301 0.686798 1.001 2

IlnBrlens{2}_rate[40] 0.981589 0.025935 0.661605 1.107846 1.000000 1.000 2

IlnBrlens{2}_rate[41] 0.920316 0.159864 0.065726 1.409063 1.000000 1.000 2

IlnBrlens{2}_rate[42] 0.953678 0.295232 0.045420 1.803833 1.000000 1.000 2

IlnBrlens{2}_rate[43] 0.704088 0.221215 0.028005 1.476762 0.646388 1.000 2

IlnBrlens{2}_rate[44] 0.844960 0.135520 0.037000 1.270110 1.000000 1.000 2

IlnBrlens{2}_rate[45] 1.400054 1.435851 0.112428 3.362673 1.085840 1.001 2

IlnBrlens{2}_rate[46] 0.885941 0.359595 0.065608 1.881587 0.792903 1.000 2

IlnBrlens{2}_rate[47] 0.631277 0.182849 0.011256 1.362757 0.566360 1.001 2

IlnBrlens{2}_rate[48] 0.995555 0.689003 0.035125 2.386004 0.858044 1.000 2

IlnBrlens{2}_rate[49] 0.997580 0.766592 0.024101 2.383866 0.840718 1.000 2

IlnBrlens{2}_rate[50] 1.096957 0.692229 0.050344 2.555424 0.935571 1.000 2

IlnBrlens{2}_rate[51] 1.331698 1.629133 0.044972 3.263947 1.027518 1.000 2

IlnBrlens{2}_rate[52] 0.855272 0.401245 0.048733 1.832860 0.758294 1.000 2

IlnBrlens{2}_rate[53] 0.696994 0.218453 0.017515 1.478331 0.635413 1.001 2

IlnBrlens{2}_rate[54] 0.686374 0.208413 0.029456 1.449945 0.622463 1.002 2

IlnBrlens{2}_rate[55] 0.887534 0.484359 0.012722 1.997316 0.782373 1.000 2

IlnBrlens{2}_rate[56] 1.034590 0.657630 0.035532 2.408092 0.898428 1.000 2

IlnBrlens{2}_rate[57] 0.893540 0.495476 0.025951 2.026119 0.785134 1.000 2

IlnBrlens{2}_rate[58] 0.884976 0.457988 0.028891 2.035570 0.779263 1.000 2

IlnBrlens{2}_rate[59] 1.312040 1.610161 0.033762 3.292873 1.013041 1.001 2

IlnBrlens{2}_rate[60] 0.893887 0.492550 0.022193 2.015261 0.786244 1.000 2

IlnBrlens{2}_rate[61] 1.804232 4.177858 0.036433 5.132055 1.203095 1.000 2

IlnBrlens{2}_rate[62] 1.327108 1.873407 0.009800 3.478803 1.004358 1.000 2

IlnBrlens{2}_rate[63] 0.943462 0.654522 0.022593 2.182633 0.805351 1.000 2

IlnBrlens{2}_rate[64] 1.058632 1.133388 0.029276 2.484270 0.877042 1.000 2

IlnBrlens{2}_rate[65] 0.887764 0.480079 0.026834 2.032162 0.780224 1.000 2

IlnBrlens{2}_rate[66] 0.851916 0.423049 0.021138 1.885248 0.751755 1.000 2

IlnBrlens{2}_rate[67] 0.834991 0.384982 0.028826 1.839193 0.749392 1.000 2

IlnBrlens{2}_rate[68] 0.839561 0.414762 0.022434 1.863205 0.747500 1.000 2

IlnBrlens{2}_rate[69] 1.082143 1.105141 0.016217 2.725137 0.876476 1.000 2

IlnBrlens{2}_rate[70] 1.561114 3.803380 0.026541 4.296566 1.076059 1.000 2

IlnBrlens{2}_rate[71] 0.788994 0.319516 0.023223 1.797922 0.692920 1.000 2

IlnBrlens{2}_rate[72] 0.885957 0.465079 0.026312 2.041917 0.777423 1.000 2

IlnBrlens{2}_rate[73] 0.996582 0.937015 0.033959 2.396635 0.830232 1.000 2

IlnBrlens{2}_rate[74] 1.083147 1.156590 0.030332 2.675748 0.872407 1.000 2

IlnBrlens{2}_rate[75] 0.897697 0.500759 0.020433 2.068907 0.792442 1.000 2

IlnBrlens{2}_rate[76] 0.866260 0.466357 0.022797 1.946380 0.759628 1.000 2

IlnBrlens{2}_rate[77] 0.893704 0.462500 0.018008 2.063062 0.776002 1.000 2

IlnBrlens{2}_rate[78] 1.472121 2.408698 0.068071 3.804540 1.080774 1.001 2

IlnBrlens{2}_rate[79] 0.928728 0.630091 0.022134 2.098189 0.809549 1.000 2

IlnBrlens{2}_rate[80] 0.915617 0.516647 0.031473 2.125443 0.781747 1.000 2

IlnBrlens{2}_rate[81] 0.935340 0.599934 0.022414 2.190741 0.817604 1.000 2

IlnBrlens{2}_rate[82] 0.952532 0.663238 0.024879 2.285678 0.806855 1.000 2

IlnBrlens{2}_rate[83] 0.958247 0.642933 0.027741 2.270819 0.818842 1.000 2

IlnBrlens{2}_rate[84] 0.866169 0.406691 0.012906 1.921451 0.776795 1.001 2

IlnBrlens{2}_rate[85] 1.120865 1.250296 0.028681 2.729371 0.906396 1.000 2

IlnBrlens{2}_rate[86] 0.969797 0.627691 0.018920 2.146193 0.846236 1.000 2

IlnBrlens{2}_rate[87] 1.389255 1.874652 0.026090 3.752553 1.032906 1.001 2

IlnBrlens{2}_rate[88] 0.959179 0.541060 0.019566 2.194223 0.830130 1.000 2

IlnBrlens{2}_rate[89] 1.132066 1.058142 0.024977 2.714540 0.932681 1.000 2

IlnBrlens{2}_rate[90] 1.163197 1.169706 0.024590 2.863164 0.960564 1.000 2

IlnBrlens{2}_rate[91] 1.292743 2.051516 0.056705 3.077609 1.005927 1.000 2

IlnBrlens{2}_rate[92] 0.956696 0.681305 0.025677 2.270904 0.823859 1.000 2

IlnBrlens{2}_rate[93] 0.982294 0.745497 0.026761 2.213734 0.835630 1.000 2

IlnBrlens{2}_rate[94] 0.984282 0.752234 0.028427 2.322829 0.829918 1.000 2

IlnBrlens{2}_rate[95] 1.037742 0.719429 0.022321 2.466130 0.891391 1.000 2

IlnBrlens{2}_rate[96] 0.969293 0.667592 0.029966 2.344373 0.836481 1.000 2
[truncated: 295,827 more chars]
